# Supplementary material for: Interaction of Cleat-Matrix on Coal Permeability from Experimental Observations and Numerical Analysis
Source: Hindawi journal article supplement (doi:10.1155/2019/7474587), 2019-11-18
Supplement: f1 [file 7474587.f1.zip]

Archive with 3 entries (3 files):
- 7474587.f1.xlsx/Fig.4.xlsx
- 7474587.f1.xlsx/Fig.5.xlsx
- 7474587.f1.xlsx/Fig.7 and Fig.8.xlsx
