# Supplementary material for: Interaction of Cleat-Matrix on Coal Permeability from Experimental Observations and Numerical Analysis
Source: Hindawi journal article supplement (doi:10.1155/2019/7474587), 2019-11-18
Supplement: f1 [file 7474587.f1.zip › 7474587.f1.xlsx/Fig.4.xlsx]

## Sheet: 4(a)
Time	Upstream pressure(5MPa)	Downstream pressure	Time	Upstream pressure(3MPa)	Downstream pressure	Time	Upstream pressure(1MPa)	Downstream pressure
0	0	0	0	-0.002	0.001	0	0.007	0
30	0.41	0	30	-0.002	0.001	30	0.118	0
60	1.002	0	60	0.902	0.001	60	0.389	0
90	1.563	0.001	90	1.357	0.001	90	0.622	0
120	2.1	0.001	120	1.591	0.001	120	0.801	0.001
150	2.583	0.001	150	1.81	0.002	150	0.936	0.001
180	3.015	0.001	180	2.006	0.003	180	1.029	0.001
210	3.396	0.004	210	2.185	0.004	210	1.095	0.001
240	3.72	0.009	240	2.342	0.005	240	1.138	0.002
270	3.982	0.017	270	2.483	0.007	270	1.168	0.002
300	4.2	0.027	300	2.603	0.011	300	1.188	0.003
330	4.37	0.039	330	2.71	0.015	330	1.202	0.004
360	4.507	0.053	360	2.801	0.019	360	1.211	0.004
390	4.611	0.069	390	2.878	0.024	390	1.217	0.005
420	4.693	0.086	420	3.006	0.029	420	1.222	0.006
450	4.755	0.104	450	3.139	0.035	450	1.225	0.007
480	4.802	0.124	480	3.22	0.041	480	1.227	0.008
510	4.836	0.145	510	3.274	0.049	510	1.228	0.009
540	4.864	0.165	540	3.304	0.056	540	1.252	0.01
570	4.884	0.186	570	3.325	0.064	570	1.252	0.01
600	4.9	0.208	600	3.335	0.072	600	1.252	0.011
630	4.912	0.231	630	3.341	0.081	630	1.252	0.013
660	4.922	0.253	660	3.344	0.089	660	1.252	0.014
690	4.929	0.276	690	3.346	0.097	674	1.251	0.015
720	4.934	0.298	720	3.347	0.106	734	1.252	0.018
750	4.957	0.321	750	3.349	0.114	794	1.252	0.02
780	5.019	0.343	780	3.349	0.123	854	1.252	0.022
810	5.046	0.367	810	3.403	0.131	914	1.252	0.025
840	5.092	0.391	837	3.403	0.139	974	1.252	0.027
870	5.115	0.415	897	3.403	0.157	1034	1.252	0.029
900	5.145	0.442	957	3.404	0.175	1094	1.252	0.032
930	5.146	0.468	1017	3.405	0.193	1154	1.252	0.034
960	5.146	0.494	1077	3.404	0.211	1214	1.252	0.037
986	5.148	0.517	1137	3.405	0.229	1274	1.252	0.039
1046	5.148	0.57	1197	3.404	0.247	1334	1.252	0.042
1106	5.148	0.624	1257	3.405	0.265	1394	1.252	0.045
1166	5.148	0.678	1317	3.405	0.284	1454	1.252	0.047
1226	5.148	0.732	1377	3.406	0.303	1514	1.252	0.049
1286	5.148	0.786	1437	3.406	0.321	1574	1.252	0.052
1346	5.149	0.839	1497	3.406	0.339	1634	1.252	0.055
1406	5.148	0.892	1557	3.406	0.358	1694	1.252	0.057
1466	5.148	0.945	1617	3.407	0.376	1754	1.252	0.06
1526	5.149	0.999	1677	3.407	0.394	1814	1.252	0.062
1586	5.149	1.054	1737	3.407	0.412	1874	1.252	0.064
1646	5.15	1.106	1797	3.408	0.431	1934	1.252	0.067
1706	5.15	1.159	1857	3.408	0.449	1994	1.252	0.069
1766	5.151	1.212	1917	3.409	0.467	2054	1.252	0.072
1826	5.151	1.265	1977	3.409	0.486	2114	1.252	0.074
1886	5.152	1.318	2037	3.41	0.504	2174	1.252	0.076
1946	5.153	1.372	2097	3.41	0.523	2234	1.252	0.079
2006	5.152	1.423	2157	3.411	0.541	2294	1.252	0.082
2066	5.153	1.475	2217	3.412	0.559	2354	1.252	0.084
2126	5.153	1.528	2277	3.412	0.578	2414	1.252	0.086
2186	5.154	1.58	2337	3.412	0.596	2474	1.252	0.088
2246	5.154	1.632	2397	3.413	0.614	2534	1.252	0.091
2306	5.155	1.684	2457	3.413	0.632	2594	1.252	0.094
2366	5.155	1.735	2517	3.414	0.65	2654	1.252	0.096
2426	5.156	1.786	2577	3.415	0.669	2714	1.252	0.099
2486	5.156	1.836	2637	3.415	0.687	2774	1.252	0.1
2546	5.157	1.886	2697	3.415	0.705	2834	1.252	0.103
2606	5.157	1.936	2757	3.416	0.723	2894	1.252	0.106
2666	5.158	1.987	2817	3.416	0.741	2954	1.252	0.108
2726	5.158	2.036	2877	3.418	0.759	3014	1.252	0.11
2786	5.158	2.085	2937	3.418	0.777	3074	1.252	0.113
2846	5.16	2.134	2997	3.418	0.795	3134	1.252	0.115
2906	5.16	2.182	3057	3.418	0.813	3194	1.252	0.118
2966	5.16	2.231	3117	3.419	0.831	3254	1.252	0.12
3026	5.16	2.278	3177	3.42	0.849	3314	1.252	0.122
3086	5.161	2.326	3237	3.42	0.866	3374	1.252	0.124
3146	5.161	2.372	3297	3.42	0.884	3434	1.252	0.127
3206	5.161	2.42	3357	3.421	0.902	3494	1.252	0.13
3266	5.162	2.466	3417	3.421	0.919	3554	1.252	0.132
3326	5.162	2.512	3477	3.421	0.937	3614	1.252	0.134
3386	5.162	2.557	3537	3.421	0.955	3674	1.252	0.136
3446	5.163	2.602	3597	3.422	0.973	3734	1.252	0.139
3506	5.163	2.647	3657	3.422	0.99	3794	1.252	0.141
3566	5.163	2.691	3717	3.422	1.008	3854	1.252	0.143
3626	5.163	2.734	3777	3.422	1.024	3914	1.251	0.145
3686	5.163	2.779	3837	3.422	1.042	3974	1.252	0.148
3746	5.164	2.822	3897	3.423	1.059	4034	1.252	0.151
3806	5.164	2.864	3957	3.422	1.076	4094	1.252	0.153
3866	5.163	2.906	4017	3.423	1.093	4154	1.252	0.155
3926	5.164	2.948	4077	3.423	1.111	4214	1.251	0.157
3986	5.164	2.989	4137	3.424	1.127	4274	1.252	0.16
4046	5.164	3.03	4197	3.424	1.144	4334	1.252	0.162
4106	5.164	3.07	4257	3.424	1.161	4394	1.252	0.165
4166	5.164	3.11	4317	3.424	1.178	4454	1.252	0.167
4226	5.164	3.149	4377	3.424	1.194	4514	1.252	0.169
4286	5.165	3.188	4437	3.424	1.211	4574	1.251	0.172
4346	5.164	3.226	4497	3.424	1.228	4634	1.252	0.173
4406	5.165	3.264	4557	3.426	1.244	4694	1.25	0.176
4466	5.164	3.301	4617	3.425	1.261	4754	1.252	0.178
4526	5.165	3.338	4677	3.424	1.277	4814	1.252	0.18
4586	5.165	3.375	4737	3.426	1.294	4874	1.252	0.182
4646	5.165	3.411	4797	3.426	1.309	4934	1.252	0.185
4706	5.166	3.445	4857	3.425	1.326	4994	1.252	0.188
4766	5.165	3.48	4917	3.425	1.342	5054	1.252	0.19
4826	5.166	3.514	4977	3.426	1.358	5114	1.252	0.192
4886	5.166	3.549	5037	3.426	1.374	5174	1.251	0.194
4946	5.166	3.582	5097	3.427	1.39	5234	1.251	0.197
5006	5.166	3.616	5157	3.427	1.405	5294	1.252	0.199
5066	5.166	3.648	5217	3.427	1.422	5354	1.251	0.201
5126	5.166	3.68	5277	3.427	1.437	5414	1.252	0.203
5186	5.166	3.711	5337	3.427	1.453	5474	1.251	0.205
5246	5.167	3.742	5397	3.427	1.468	5534	1.251	0.208
5306	5.166	3.773	5457	3.427	1.483	5594	1.25	0.21
5366	5.167	3.802	5517	3.427	1.499	5654	1.252	0.213
5426	5.167	3.832	5577	3.427	1.514	5714	1.251	0.215
5486	5.167	3.862	5637	3.428	1.529	5774	1.251	0.217
5546	5.166	3.89	5697	3.427	1.544	5834	1.252	0.219
5606	5.168	3.918	5757	3.428	1.56	5894	1.251	0.221
5666	5.168	3.946	5817	3.428	1.574	5954	1.251	0.223
5726	5.168	3.973	5877	3.428	1.589	6014	1.252	0.226
5786	5.168	4	5937	3.428	1.604	6074	1.252	0.228
5846	5.168	4.026	5997	3.429	1.619	6134	1.25	0.23
5906	5.168	4.051	6057	3.428	1.633	6194	1.251	0.232
5966	5.169	4.077	6117	3.429	1.648	6254	1.251	0.235
6026	5.169	4.101	6177	3.429	1.663	6314	1.252	0.237
6086	5.169	4.126	6237	3.429	1.677	6374	1.251	0.239
6146	5.169	4.15	6297	3.43	1.691	6434	1.251	0.241
6206	5.169	4.174	6357	3.43	1.705	6494	1.251	0.244
6266	5.169	4.196	6417	3.43	1.72	6554	1.251	0.246
6326	5.169	4.219	6477	3.429	1.734	6614	1.25	0.248
6386	5.169	4.242	6537	3.43	1.748	6674	1.251	0.251
6446	5.169	4.264	6597	3.43	1.761	6734	1.251	0.252
6506	5.17	4.285	6657	3.43	1.775	6794	1.25	0.255
6566	5.169	4.306	6717	3.43	1.789	6854	1.25	0.257
6626	5.17	4.326	6777	3.43	1.802	6914	1.25	0.259
6686	5.169	4.346	6837	3.43	1.816	6974	1.25	0.261
6746	5.17	4.366	6897	3.431	1.829	7034	1.25	0.263
6806	5.17	4.385	6957	3.43	1.842	7094	1.251	0.265
6866	5.17	4.404	7017	3.431	1.856	7154	1.249	0.267
6926	5.17	4.423	7077	3.432	1.869	7214	1.25	0.27
6986	5.17	4.441	7137	3.432	1.882	7274	1.249	0.271
7046	5.17	4.459	7197	3.431	1.895	7334	1.25	0.274
7106	5.169	4.476	7257	3.431	1.908	7394	1.251	0.276
7166	5.17	4.493	7317	3.431	1.921	7454	1.25	0.278
7226	5.172	4.51	7377	3.431	1.933	7514	1.25	0.28
7286	5.171	4.526	7437	3.431	1.946	7574	1.251	0.283
7346	5.171	4.542	7497	3.432	1.959	7634	1.251	0.285
7406	5.172	4.557	7557	3.432	1.972	7694	1.251	0.286
7466	5.171	4.572	7617	3.431	1.984	7754	1.25	0.289
7526	5.172	4.587	7677	3.431	1.996	7814	1.251	0.292
7586	5.171	4.602	7737	3.431	2.008	7874	1.25	0.293
7646	5.171	4.615	7797	3.431	2.021	7990	1.251	0.298
7706	5.171	4.63	7857	3.431	2.033	8050	1.25	0.3
7766	5.172	4.643	7917	3.431	2.045	8110	1.25	0.302
7826	5.17	4.657	7977	3.431	2.057	8170	1.25	0.304
7886	5.17	4.669	8037	3.431	2.068	8230	1.25	0.306
7946	5.171	4.682	8097	3.431	2.08	8290	1.25	0.309
8006	5.172	4.694	8157	3.431	2.092	8350	1.249	0.31
8066	5.171	4.706	8217	3.432	2.104	8410	1.25	0.313
8126	5.171	4.717	8277	3.431	2.115	8470	1.249	0.315
8186	5.171	4.729	8337	3.43	2.127	8530	1.25	0.317
8246	5.171	4.74	8397	3.431	2.138	8590	1.25	0.319
8306	5.172	4.75	8457	3.431	2.149	8650	1.25	0.322
8366	5.172	4.762	8517	3.431	2.161	8710	1.25	0.324
8426	5.172	4.771	8577	3.432	2.173	8770	1.25	0.325
8486	5.171	4.781	8637	3.431	2.183	8830	1.25	0.328
8546	5.172	4.792	8697	3.431	2.194	8890	1.25	0.33
8606	5.172	4.801	8757	3.431	2.205	8950	1.25	0.332
8666	5.172	4.81	8817	3.431	2.216	9010	1.25	0.334
8726	5.173	4.82	8877	3.431	2.226	9070	1.25	0.337
8786	5.173	4.828	8937	3.431	2.236	9130	1.249	0.338
8846	5.174	4.837	8997	3.431	2.248	9190	1.25	0.341
8906	5.174	4.845	9057	3.431	2.257	9250	1.25	0.343
8966	5.175	4.854	9117	3.431	2.268	9310	1.25	0.345
9026	5.176	4.862	9177	3.431	2.278	9370	1.25	0.347
9086	5.176	4.87	9237	3.431	2.289	9430	1.249	0.349
9146	5.176	4.878	9297	3.431	2.299	9490	1.249	0.351
9206	5.176	4.885	9357	3.431	2.309	9550	1.249	0.354
9266	5.177	4.892	9417	3.431	2.319	9610	1.249	0.355
9326	5.176	4.899	9477	3.43	2.329	9670	1.249	0.358
9386	5.177	4.906	9537	3.431	2.339	9730	1.25	0.36
9446	5.178	4.913	9597	3.43	2.348	9790	1.249	0.363
9506	5.178	4.92	9657	3.43	2.358	9850	1.249	0.364
9566	5.178	4.927	9717	3.43	2.368	9910	1.249	0.366
9626	5.178	4.933	9777	3.43	2.377	9970	1.249	0.368
9686	5.178	4.939	9837	3.43	2.387	10030	1.249	0.37
9746	5.18	4.946	9897	3.43	2.396	10090	1.249	0.373
9806	5.179	4.951	9957	3.43	2.405	10150	1.249	0.374
9866	5.18	4.957	10017	3.43	2.414	10210	1.249	0.377
9926	5.179	4.963	10077	3.429	2.423	10270	1.249	0.379
9986	5.178	4.968	10137	3.429	2.433	10330	1.249	0.381
10046	5.178	4.973	10197	3.429	2.442	10390	1.249	0.383
10106	5.179	4.978	10257	3.429	2.451	10450	1.249	0.385
10166	5.179	4.983	10317	3.429	2.46	10510	1.249	0.387
10226	5.179	4.988	10377	3.429	2.468	10570	1.249	0.389
10286	5.178	4.992	10437	3.428	2.477	10630	1.249	0.391
10346	5.179	4.997	10497	3.428	2.486	10690	1.249	0.393
10406	5.178	5.001	10557	3.429	2.494	10750	1.249	0.395
10466	5.178	5.005	10617	3.429	2.502	10810	1.249	0.397
10526	5.178	5.01	10677	3.428	2.51	10870	1.249	0.4
10586	5.178	5.014	10737	3.428	2.519	10930	1.249	0.401
10646	5.179	5.017	10797	3.428	2.527	10990	1.249	0.404
10706	5.178	5.022	10857	3.428	2.536	11050	1.249	0.406
10766	5.178	5.025	10917	3.428	2.544	11110	1.249	0.408
10826	5.178	5.028	10977	3.428	2.552	11170	1.249	0.41
10886	5.178	5.032	11037	3.428	2.56	11230	1.249	0.412
10946	5.178	5.035	11097	3.428	2.568	11290	1.249	0.414
11006	5.178	5.039	11157	3.427	2.575	11350	1.249	0.416
11066	5.178	5.041	11217	3.427	2.583	11410	1.249	0.418
11126	5.178	5.044	11277	3.427	2.59	11470	1.249	0.42
11186	5.178	5.048	11337	3.427	2.599	11530	1.249	0.422
11246	5.178	5.051	11397	3.427	2.606	11590	1.249	0.424
11306	5.178	5.054	11457	3.427	2.614	11650	1.249	0.426
11366	5.178	5.057	11517	3.427	2.622	11710	1.248	0.428
11426	5.178	5.059	11577	3.427	2.629	11770	1.249	0.43
11486	5.178	5.062	11637	3.427	2.635	11830	1.249	0.432
11546	5.178	5.065	11697	3.426	2.643	11890	1.249	0.434
11606	5.178	5.067	11757	3.427	2.651	11950	1.248	0.436
11666	5.178	5.069	11817	3.427	2.658	12010	1.248	0.439
11726	5.178	5.072	11877	3.427	2.665	12070	1.249	0.44
11786	5.178	5.074	11937	3.426	2.671	12130	1.249	0.442
11846	5.178	5.076	11997	3.427	2.678	12190	1.248	0.444
11906	5.178	5.079	12057	3.426	2.685	12250	1.248	0.446
11966	5.178	5.08	12117	3.426	2.692	12310	1.248	0.448
12026	5.178	5.083	12177	3.425	2.698	12370	1.248	0.45
12086	5.178	5.085	12237	3.425	2.705	12430	1.249	0.452
12146	5.178	5.086	12297	3.425	2.712	12490	1.248	0.454
12206	5.178	5.088	12357	3.426	2.718	12550	1.249	0.456
12266	5.178	5.089	12417	3.426	2.725	12610	1.248	0.458
12326	5.178	5.091	12477	3.426	2.731	12670	1.248	0.46
12386	5.178	4.929	12537	3.426	2.737	12730	1.248	0.462
12446	5.177	4.939	12597	3.426	2.744	12790	1.248	0.463
12506	5.178	4.947	12657	3.424	2.75	12850	1.247	0.466
12566	5.177	4.951	12717	3.425	2.756	12910	1.249	0.468
12626	5.178	4.957	12777	3.425	2.763	12970	1.248	0.47
12686	5.178	4.964	12837	3.425	2.769	13030	1.248	0.472
12746	5.177	4.97	12897	3.426	2.775	13090	1.248	0.473
12806	5.177	4.976	12957	3.424	2.781	13150	1.248	0.476
12866	5.177	4.981	13017	3.424	2.787	13210	1.248	0.478
12926	5.177	4.986	13077	3.424	2.792	13270	1.248	0.48
12986	5.177	4.991	13137	3.425	2.798	13330	1.248	0.481
13046	5.177	4.996	13197	3.424	2.804	13390	1.248	0.484
13106	5.177	5	13257	3.424	2.809	13450	1.248	0.485
13166	5.177	5.005	13317	3.424	2.815	13510	1.248	0.487
13226	5.177	5.009	13377	3.424	2.821	13570	1.248	0.489
13286	5.177	5.013	13437	3.424	2.827	13630	1.247	0.491
13346	5.177	5.017	13497	3.424	2.832	13690	1.248	0.493
13406	5.177	5.02	13557	3.424	2.837	13750	1.247	0.495
13466	5.178	5.024	13617	3.424	2.843	13810	1.248	0.497
13526	5.177	5.028	13677	3.424	2.848	13870	1.248	0.499
13586	5.176	5.032	13737	3.424	2.853	13930	1.246	0.5
13646	5.177	5.035	13797	3.424	2.859	13990	1.248	0.502
13706	5.177	5.038	13857	3.423	2.863	14050	1.247	0.504
13766	5.176	5.042	13917	3.424	2.869	14110	1.248	0.506
13826	5.177	5.045	13977	3.424	2.873	14170	1.248	0.508
13886	5.176	5.047	14037	3.424	2.879	14230	1.247	0.509
13946	5.177	5.051	14097	3.425	2.884	14290	1.247	0.511
14006	5.177	5.053	14157	3.425	2.889	14350	1.247	0.514
14066	5.176	5.056	14217	3.425	2.894	14410	1.248	0.515
14126	5.177	5.059	14277	3.426	2.899	14470	1.248	0.517
14186	5.176	5.062	14337	3.426	2.904	14530	1.248	0.519
14246	5.176	5.064	14397	3.426	2.908	14590	1.248	0.52
14306	5.176	5.066	14457	3.427	2.913	14650	1.248	0.523
14366	5.176	5.068	14517	3.427	2.918	14710	1.248	0.524
14426	5.176	5.071	14577	3.426	2.923	14770	1.247	0.526
14486	5.177	5.073	14637	3.427	2.927	14830	1.248	0.528
14546	5.177	5.075	14697	3.427	2.932	14890	1.248	0.53
14606	5.177	5.077	14757	3.427	2.936	14950	1.248	0.532
14666	5.177	5.08	14817	3.428	2.941	15010	1.248	0.534
14726	5.176	5.082	14877	3.428	2.945	15070	1.247	0.535
14786	5.177	5.083	14937	3.428	2.95	15130	1.248	0.537
14846	5.177	5.085	14997	3.429	2.954	15190	1.247	0.539
14906	5.177	5.087	15057	3.428	2.959	15250	1.247	0.541
14966	5.176	5.089	15117	3.429	2.963	15310	1.246	0.543
15026	5.176	5.091	15177	3.429	2.967	15370	1.247	0.544
15086	5.177	5.093	15237	3.43	2.971	15430	1.247	0.547
15146	5.177	5.095	15297	3.43	2.975	15490	1.247	0.548
15206	5.177	5.096	15357	3.429	2.98	15550	1.246	0.55
15266	5.177	5.098	15417	3.43	2.984	15610	1.248	0.552
15326	5.176	5.099	15477	3.43	2.988	15670	1.246	0.554
15386	5.176	5.101	15537	3.43	2.992	15730	1.247	0.556
15446	5.176	5.102	15597	3.43	2.996	15790	1.246	0.557
15506	5.176	5.103	15657	3.431	3.001	15850	1.247	0.559
15566	5.176	5.104	15717	3.43	3.004	15910	1.246	0.56
15626	5.177	5.106	15777	3.431	3.008	15970	1.246	0.562
15686	5.176	5.107	15837	3.431	3.012	16030	1.246	0.565
15746	5.176	5.108	15897	3.431	3.016	16090	1.247	0.565
15806	5.177	5.109	15957	3.431	3.02	16150	1.246	0.568
15866	5.176	5.11	16017	3.431	3.024	16210	1.246	0.569
15926	5.177	5.112	16077	3.431	3.028	16270	1.247	0.571
15986	5.177	5.113	16137	3.432	3.031	16330	1.246	0.574
16046	5.177	5.114	16197	3.431	3.035	16390	1.247	0.574
16106	5.177	5.115	16257	3.431	3.038	16450	1.246	0.576
16166	5.176	5.116	16317	3.432	3.042	16510	1.246	0.578
16226	5.177	5.116	16377	3.432	3.046	16570	1.248	0.58
16286	5.177	5.117	16437	3.432	3.049	16630	1.246	0.582
16346	5.177	5.118	16497	3.431	3.053	16690	1.247	0.583
16406	5.176	5.119	16557	3.432	3.056	16750	1.246	0.585
16466	5.177	5.12	16617	3.432	3.06	16810	1.246	0.587
16526	5.177	5.121	16677	3.431	3.064	16870	1.246	0.588
16586	5.177	5.121	16737	3.432	3.066	16930	1.246	0.59
16646	5.177	5.122	16797	3.432	3.07	16990	1.246	0.592
16706	5.176	5.122	16857	3.432	3.073	17050	1.246	0.593
16766	5.177	5.125	16917	3.433	3.076	17110	1.246	0.595
16826	5.177	5.125	16977	3.432	3.079	17170	1.246	0.597
16886	5.177	5.125	17037	3.432	3.083	17230	1.246	0.598
16946	5.177	5.126	17097	3.432	3.086	17290	1.247	0.6
17006	5.177	5.127	17157	3.432	3.089	17350	1.246	0.601
17066	5.177	5.127	17217	3.431	3.092	17410	1.246	0.603
17126	5.177	5.128	17277	3.431	3.095	17470	1.246	0.605
17186	5.177	5.129	17337	3.432	3.099	17530	1.246	0.607
17246	5.177	5.129	17397	3.432	3.101	17590	1.246	0.609
17306	5.177	5.13	17457	3.432	3.104	17650	1.246	0.61
17366	5.177	5.131	17517	3.432	3.107	17710	1.246	0.612
17426	5.177	5.131	17577	3.431	3.11	17770	1.246	0.613
17486	5.177	5.131	17637	3.432	3.113	17830	1.246	0.615
17546	5.177	5.133	17697	3.431	3.117	17890	1.246	0.616
17606	5.178	5.133	17757	3.432	3.119	17950	1.246	0.618
17666	5.177	5.134	17817	3.432	3.122	18010	1.246	0.619
17726	5.177	5.134	17877	3.431	3.125	18070	1.246	0.621
17786	5.177	5.134	17937	3.431	3.127	18130	1.246	0.623
17846	5.177	5.135	17997	3.432	3.13	18190	1.246	0.625
17906	5.177	5.135	18057	3.432	3.133	18250	1.246	0.627
17966	5.178	5.136	18117	3.432	3.136	18310	1.246	0.628
18026	5.178	5.136	18177	3.431	3.139	18370	1.246	0.629
18086	5.177	5.137	18237	3.432	3.142	18430	1.246	0.631
18146	5.178	5.137	18340	3.431	3.146	18490	1.246	0.634
18206	5.178	5.138	18400	3.432	3.148	18550	1.246	0.634
18266	5.177	5.138	18460	3.431	3.151	18610	1.246	0.637
18326	5.178	5.137	18520	3.431	3.154	18670	1.246	0.638
18386	5.177	5.138	18580	3.431	3.156	18730	1.246	0.64
18446	5.177	5.138	18640	3.431	3.159	18790	1.246	0.641
18506	5.178	5.138	18700	3.432	3.16	18850	1.245	0.642
18566	5.178	5.139	18760	3.43	3.163	18910	1.246	0.643
18626	5.178	5.139	18820	3.431	3.166	18970	1.246	0.646
18686	5.177	5.139	18880	3.431	3.168	19030	1.245	0.647
18746	5.178	5.139	18940	3.431	3.171	19090	1.246	0.649
18806	5.177	5.14	19000	3.432	3.173	19150	1.245	0.65
18866	5.178	5.14	19060	3.431	3.175	19210	1.246	0.652
18926	5.178	5.14	19120	3.431	3.178	19270	1.245	0.654
18986	5.178	5.14	19180	3.431	3.18	19330	1.246	0.655
19046	5.178	5.14	19240	3.431	3.182	19390	1.246	0.656
19106	5.178	5.14	19300	3.431	3.184	19450	1.246	0.658
19166	5.178	5.14	19360	3.432	3.187	19510	1.246	0.66
19226	5.178	5.14	19420	3.43	3.189	19570	1.246	0.661
19286	5.178	5.14	19480	3.431	3.191	19630	1.246	0.662
19346	5.178	5.14	19540	3.431	3.193	19690	1.246	0.664
19406	5.178	5.142	19600	3.431	3.195	19750	1.246	0.666
19466	5.178	5.141	19660	3.431	3.198	19810	1.246	0.667
19526	5.178	5.142	19720	3.43	3.199	19870	1.245	0.669
19586	5.178	5.142	19780	3.431	3.202	19930	1.246	0.67
19646	5.178	5.143	19840	3.431	3.204	19990	1.245	0.672
19706	5.178	5.143	19900	3.431	3.206	20050	1.245	0.673
19766	5.178	5.143	19960	3.431	3.208	20110	1.245	0.675
19826	5.178	5.143	20020	3.431	3.209	20170	1.245	0.676
19886	5.178	5.143	20080	3.431	3.211	20230	1.245	0.678
19946	5.179	5.143	20140	3.431	3.214	20290	1.245	0.679
20006	5.179	5.143	20200	3.431	3.215	20350	1.245	0.681
20066	5.178	5.143	20260	3.43	3.217	20410	1.245	0.682
20126	5.179	5.144	20320	3.431	3.22	20470	1.245	0.684
20186	5.179	5.144	20380	3.431	3.221	20530	1.245	0.685
20246	5.179	5.144	20440	3.431	3.223	20590	1.245	0.687
20306	5.179	5.145	20500	3.431	3.225	20650	1.245	0.688
20366	5.178	5.145	20560	3.43	3.227	20710	1.245	0.69
20426	5.18	5.145	20620	3.431	3.229	20770	1.245	0.691
20486	5.179	5.144	20680	3.43	3.23	20830	1.245	0.693
20546	5.18	5.145	20740	3.431	3.232	20890	1.245	0.694
20606	5.18	5.146	20800	3.431	3.234	20950	1.245	0.696
20666	5.179	5.145	20860	3.431	3.236	21010	1.245	0.697
20726	5.179	5.145	20920	3.43	3.238	21070	1.245	0.699
20786	5.178	5.145	20980	3.43	3.24	21130	1.245	0.7
20846	5.18	5.146	21040	3.431	3.241	21190	1.245	0.701
20906	5.179	5.146	21100	3.43	3.243	21250	1.245	0.703
20966	5.179	5.146	21160	3.431	3.244	21310	1.245	0.704
21026	5.179	5.146	21220	3.431	3.246	21370	1.245	0.706
21086	5.18	5.146	21280	3.43	3.248	21430	1.246	0.707
21146	5.18	5.146	21340	3.431	3.249	21490	1.245	0.709
21206	5.18	5.146	21400	3.43	3.25	21550	1.244	0.71
21266	5.18	5.146	21460	3.43	3.252	21610	1.245	0.712
21326	5.18	5.146	21520	3.43	3.254	21670	1.245	0.713
21386	5.18	5.146	21580	3.43	3.256	21730	1.245	0.714
21446	5.18	5.147	21640	3.43	3.257	21790	1.245	0.716
21506	5.18	5.146	21700	3.43	3.258	21850	1.245	0.718
21566	5.18	5.147	21760	3.431	3.26	21910	1.245	0.718
21626	5.18	5.147	21820	3.43	3.262	21970	1.245	0.721
21686	5.181	5.147	21880	3.43	3.263	22030	1.244	0.721
21746	5.18	5.147	21940	3.431	3.265	22090	1.245	0.723
21806	5.18	5.147	22000	3.43	3.266	22150	1.243	0.724
21866	5.181	5.147	22060	3.43	3.267	22210	1.244	0.726
21926	5.18	5.148	22120	3.43	3.269	22270	1.245	0.727
21986	5.18	5.144	22180	3.43	3.27	22330	1.245	0.728
22046	5.18	4.914	22240	3.43	3.271	22390	1.244	0.73
22106	5.18	4.923	22300	3.43	3.273	22450	1.245	0.731
22166	5.18	4.93	22360	3.43	3.274	22510	1.244	0.733
22226	5.18	4.936	22420	3.43	3.276	22570	1.244	0.734
22286	5.181	4.944	22480	3.43	3.277	22630	1.243	0.735
22346	5.18	4.95	22540	3.43	3.279	22690	1.244	0.736
22406	5.178	4.956	22600	3.43	3.28	22750	1.244	0.738
22466	5.18	4.962	22660	3.431	3.281	22810	1.244	0.739
22526	5.179	4.967	22720	3.43	3.282	22870	1.244	0.741
22586	5.179	4.973	22780	3.43	3.283	22930	1.244	0.742
22646	5.18	4.978	22840	3.431	3.285	22990	1.244	0.744
22706	5.18	4.983	22900	3.43	3.286	23050	1.245	0.745
22766	5.178	4.988	22960	3.43	3.287	23110	1.244	0.746
22826	5.179	4.993	23020	3.43	3.289	23170	1.244	0.748
22886	5.18	4.997	23080	3.43	3.289	23230	1.244	0.749
22946	5.18	5.002	23140	3.43	3.291	23290	1.244	0.75
23006	5.179	5.005	23200	3.43	3.292	23350	1.244	0.751
23066	5.179	5.01	23260	3.43	3.293	23410	1.244	0.753
23126	5.18	5.014	23320	3.43	3.295	23470	1.244	0.754
23186	5.18	5.018	23380	3.43	3.296	23530	1.244	0.755
23246	5.179	5.022	23440	3.43	3.297	23590	1.244	0.757
23306	5.179	5.026	23500	3.43	3.298	23650	1.244	0.758
23366	5.179	5.03	23560	3.43	3.299	23710	1.244	0.759
23426	5.179	5.033	23620	3.43	3.301	23770	1.244	0.761
23486	5.179	5.036	23680	3.43	3.301	23830	1.244	0.762
23546	5.179	5.04	23740	3.43	3.303	23890	1.243	0.763
23606	5.179	5.043	23800	3.43	3.303	23950	1.244	0.764
23666	5.179	5.046	23860	3.43	3.305	24010	1.244	0.766
23726	5.179	5.049	23920	3.43	3.306	24070	1.244	0.767
23786	5.18	5.051	23980	3.43	3.307	24130	1.244	0.769
23846	5.179	5.055	24040	3.43	3.308	24190	1.243	0.769
23906	5.18	5.058	24100	3.43	3.309	24250	1.243	0.771
23966	5.18	5.06	24160	3.43	3.31	24310	1.244	0.772
24026	5.18	5.062	24220	3.43	3.31	24370	1.243	0.773
24086	5.179	5.065	24280	3.43	3.312	24430	1.244	0.775
24146	5.179	5.068	24340	3.43	3.313	24490	1.243	0.776
24206	5.18	5.071	24400	3.429	3.314	24550	1.244	0.777
24266	5.18	5.072	24460	3.43	3.315	24610	1.242	0.778
24326	5.18	5.075	24520	3.43	3.316	24670	1.244	0.78
24386	5.179	5.077	24580	3.43	3.317	24730	1.244	0.781
24446	5.178	5.079	24640	3.43	3.317	24790	1.243	0.782
24506	5.178	5.081	24700	3.43	3.319	24850	1.243	0.783
24566	5.179	5.083	24760	3.43	3.32	24910	1.244	0.784
24626	5.178	5.085	24820	3.43	3.321	24970	1.244	0.786
24686	5.179	5.087	24880	3.43	3.321	25030	1.243	0.787
24746	5.179	5.089	24940	3.429	3.322	25090	1.244	0.789
24806	5.179	5.09	25000	3.43	3.323	25150	1.244	0.79
24866	5.179	5.092	25060	3.43	3.324	25210	1.243	0.791
24926	5.18	5.094	25120	3.429	3.325	25270	1.243	0.792
24986	5.179	5.095	25180	3.43	3.325	25330	1.243	0.793
25046	5.18	5.097	25240	3.429	3.327	25390	1.243	0.795
25106	5.18	5.098	25300	3.43	3.328	25450	1.243	0.796
25166	5.179	5.1	25360	3.43	3.328	25510	1.243	0.797
25226	5.18	5.101	25420	3.43	3.329	25570	1.243	0.798
25286	5.18	5.103	25480	3.43	3.33	25630	1.243	0.799
25346	5.18	5.104	25540	3.43	3.331	25690	1.243	0.8
25406	5.179	5.105	25600	3.43	3.331	25750	1.243	0.802
25466	5.179	5.107	25660	3.43	3.332	25810	1.243	0.803
25526	5.179	5.108	25720	3.43	3.333	25870	1.244	0.805
25586	5.18	5.109	25780	3.43	3.334	25930	1.243	0.805
25646	5.18	5.111	25840	3.43	3.334	25990	1.243	0.807
25706	5.179	5.111	25900	3.43	3.336	26050	1.244	0.808
25766	5.18	5.113	25960	3.43	3.337	26110	1.243	0.808
25826	5.179	5.113	26020	3.43	3.337	26170	1.243	0.811
25886	5.179	5.114	26080	3.431	3.338	26230	1.243	0.812
25946	5.18	5.116	26140	3.43	3.338	26290	1.243	0.812
26006	5.18	5.117	26200	3.43	3.339	26350	1.243	0.814
26066	5.181	5.117	26260	3.43	3.34	26410	1.243	0.815
26126	5.179	5.118	26320	3.431	3.34	26470	1.243	0.816
26186	5.181	5.119	26380	3.43	3.341	26530	1.243	0.817
26246	5.18	5.12	26440	3.43	3.342	26590	1.243	0.818
26306	5.18	5.121	26500	3.43	3.343	26650	1.243	0.82
26366	5.18	5.122	26560	3.43	3.343	26710	1.243	0.82
26426	5.18	5.122	26620	3.43	3.344	26770	1.243	0.822
26486	5.179	5.123	26680	3.43	3.345	26830	1.243	0.823
26546	5.18	5.125	26740	3.43	3.346	26890	1.243	0.824
26606	5.18	5.125	26800	3.43	3.346	26950	1.243	0.826
26666	5.18	5.125	26860	3.43	3.346	27010	1.243	0.826
26726	5.181	5.126	26920	3.43	3.347	27070	1.243	0.827
26786	5.179	5.127	26980	3.43	3.348	27130	1.242	0.829
26846	5.18	5.127	27040	3.43	3.348	27190	1.243	0.83
26906	5.18	5.128	27100	3.43	3.349	27250	1.243	0.83
26966	5.18	5.129	27160	3.43	3.35	27310	1.243	0.832
27026	5.18	5.129	27220	3.43	3.351	27370	1.243	0.833
27086	5.18	5.13	27280	3.431	3.351	27430	1.243	0.834
27146	5.18	5.13	27340	3.43	3.351	27490	1.243	0.835
27206	5.18	5.131	27400	3.43	3.352	27550	1.243	0.837
27266	5.18	5.131	27460	3.43	3.352	27610	1.243	0.838
27326	5.18	5.131	27520	3.43	3.353	27670	1.242	0.838
27386	5.18	5.132	27580	3.43	3.354	27730	1.243	0.839
27446	5.18	5.133	27640	3.43	3.355	27790	1.243	0.841
27506	5.18	5.134	27700	3.43	3.355	27850	1.243	0.841
27566	5.18	5.134	27760	3.43	3.355	27910	1.243	0.843
27626	5.18	5.134	27820	3.43	3.356	27970	1.242	0.844
27686	5.18	5.134	27880	3.43	3.357	28030	1.242	0.845
27746	5.18	5.135	27940	3.43	3.357	28090	1.243	0.846
27806	5.18	5.135	28000	3.43	3.358	28150	1.243	0.847
27866	5.18	5.136	28060	3.43	3.358	28210	1.243	0.848
27926	5.18	5.136	28120	3.43	3.359	28270	1.243	0.849
27986	5.18	5.137	28180	3.43	3.359	28330	1.242	0.85
28046	5.181	5.132	28240	3.43	3.36	28390	1.243	0.851
28106	5.18	5.021	28300	3.43	3.36	28450	1.242	0.853
28166	5.18	4.945	28360	3.43	3.361	28510	1.243	0.853
28226	5.18	4.956	28420	3.43	3.361	28570	1.243	0.855
28286	5.181	4.963	28480	3.43	3.362	28630	1.242	0.855
28346	5.18	4.97	28540	3.43	3.363	28690	1.242	0.857
28406	5.179	4.975	28600	3.43	3.364	28750	1.242	0.858
28466	5.18	4.981	28660	3.43	3.364	28810	1.242	0.859
28526	5.18	4.987	28720	3.43	3.364	28870	1.242	0.86
28586	5.179	4.991	28780	3.43	3.364	28930	1.242	0.861
28646	5.179	4.996	28840	3.43	3.364	28990	1.242	0.862
28706	5.18	5	28900	3.43	3.366	29050	1.242	0.862
28766	5.179	5.005	28960	3.43	3.366	29110	1.242	0.864
28826	5.179	5.009	29020	3.43	3.366	29170	1.242	0.865
28886	5.178	5.013	29080	3.43	3.366	29230	1.242	0.866
28946	5.179	5.017	29140	3.43	3.367	29290	1.241	0.867
29006	5.178	5.021	29200	3.43	3.368	29350	1.242	0.868
29066	5.179	5.025	29260	3.43	3.368	29410	1.243	0.869
29126	5.179	5.029	29320	3.43	3.369	29470	1.242	0.87
29186	5.178	5.032	29380	3.43	3.369	29530	1.242	0.871
29246	5.178	5.035	29440	3.43	3.369	29590	1.243	0.872
29306	5.178	5.039	29500	3.43	3.37	29650	1.241	0.874
29366	5.178	5.042	29560	3.43	3.37	29710	1.242	0.874
29426	5.178	5.046	29620	3.43	3.37	29770	1.242	0.875
29486	5.178	5.049	29680	3.43	3.37	29830	1.242	0.876
29546	5.178	5.052	29740	3.43	3.371	29890	1.242	0.877
29606	5.178	5.054	29800	3.43	3.372	29950	1.242	0.878
29666	5.179	5.057	29860	3.43	3.372	30010	1.242	0.88
29726	5.178	5.06	29920	3.429	3.372	30070	1.243	0.88
29786	5.178	5.063	29980	3.43	3.373	30130	1.242	0.881
29846	5.178	5.065	30040	3.429	3.373	30190	1.242	0.882
29906	5.178	5.068	30100	3.43	3.373	30250	1.242	0.883
29966	5.178	5.07	30160	3.43	3.374	30310	1.242	0.884
30026	5.178	5.072	30220	3.429	3.374	30370	1.242	0.885
30086	5.178	5.074	30280	3.43	3.375	30430	1.242	0.886
30146	5.178	5.077	30340	3.43	3.375	30490	1.242	0.888
30206	5.178	5.078	30400	3.43	3.375	30550	1.242	0.889
30266	5.178	5.08	30460	3.43	3.376	30610	1.241	0.889
30326	5.178	5.082	30520	3.43	3.376	30670	1.242	0.89
30386	5.178	5.085	30580	3.43	3.376	30730	1.242	0.892
30446	5.178	5.086	30640	3.43	3.377	30790	1.242	0.892
30506	5.178	5.089	30700	3.43	3.377	30850	1.242	0.893
30566	5.178	5.09	30760	3.43	3.377	30910	1.242	0.894
30626	5.178	5.092	30820	3.43	3.378	30970	1.242	0.895
30686	5.178	5.093	30880	3.43	3.378	31030	1.242	0.896
30746	5.178	5.095	30940	3.429	3.379	31090	1.242	0.897
30806	5.178	5.096	31000	3.43	3.379	31150	1.242	0.898
30866	5.178	5.098	31060	3.43	3.379	31210	1.242	0.898
30926	5.178	5.099	31120	3.429	3.379	31270	1.241	0.9
30986	5.178	5.101	31180	3.429	3.38	31330	1.242	0.901
31046	5.178	5.103	31240	3.43	3.38	31390	1.241	0.901
31106	5.178	5.104	31300	3.429	3.38	31450	1.241	0.902
31166	5.178	5.104	31360	3.43	3.381	31510	1.241	0.903
31226	5.178	5.107	31420	3.43	3.382	31570	1.241	0.904
31286	5.178	5.107	31480	3.43	3.381	31630	1.242	0.906
31346	5.179	5.109	31540	3.429	3.382	31690	1.242	0.907
31406	5.178	5.11	31600	3.43	3.382	31750	1.241	0.907
31466	5.178	5.111	31660	3.43	3.382	31810	1.241	0.908
31526	5.178	5.112	31720	3.43	3.382	31870	1.242	0.909
31586	5.178	5.113	31780	3.43	3.383	31930	1.241	0.91
31646	5.178	5.113	31840	3.43	3.383	31990	1.241	0.911
31706	5.178	5.114	31900	3.43	3.384	32050	1.242	0.911
31766	5.178	5.116	31960	3.43	3.384	32110	1.241	0.913
31826	5.178	5.117	32020	3.43	3.384	32170	1.242	0.914
31886	5.178	5.117	32080	3.43	3.385	32230	1.241	0.914
31946	5.178	5.118	32140	3.43	3.385	32290	1.242	0.915
32006	5.178	5.119	32200	3.43	3.385	32350	1.241	0.916
32066	5.178	5.12	32260	3.43	3.385	32410	1.242	0.917
32126	5.178	5.121	32320	3.43	3.385	32470	1.242	0.919
32186	5.179	5.122	32380	3.43	3.386	32530	1.241	0.919
32246	5.178	5.122	32440	3.43	3.386	32590	1.241	0.92
32306	5.178	5.123	32500	3.43	3.386	32650	1.241	0.922
32366	5.178	5.123	32560	3.43	3.386	32710	1.242	0.922
32426	5.178	5.124	32620	3.43	3.386	32770	1.24	0.922
32486	5.178	5.125	32680	3.43	3.387	32830	1.241	0.924
32546	5.178	5.125	32740	3.43	3.388	32890	1.241	0.924
32606	5.178	5.116	32800	3.43	3.388	32950	1.242	0.925
32666	5.178	5.014	32860	3.43	3.388	33010	1.241	0.926
32726	5.178	4.944	32920	3.43	3.388	33070	1.241	0.927
32786	5.178	4.954	32980	3.43	3.388	33130	1.241	0.928
32846	5.178	4.961	33040	3.43	3.389	33190	1.241	0.929
32906	5.177	4.968	33100	3.43	3.389	33250	1.241	0.93
32966	5.177	4.974	33160	3.43	3.389	33310	1.241	0.931
33026	5.177	4.979	33220	3.43	3.389	33370	1.241	0.931
33086	5.177	4.984	33280	3.431	3.39	33430	1.241	0.932
33146	5.177	4.99	33340	3.43	3.39	33490	1.24	0.933
33206	5.177	4.994	33400	3.43	3.39	33550	1.241	0.934
33266	5.176	4.999	33460	3.43	3.39	33610	1.241	0.934
33326	5.177	5.003	33520	3.43	3.39	33670	1.241	0.935
33386	5.176	5.008	33580	3.43	3.391	33730	1.241	0.937
33446	5.177	5.011	33640	3.43	3.391	33790	1.241	0.937
33506	5.177	5.015	33700	3.43	3.391	33850	1.241	0.938
33566	5.177	5.019	33760	3.43	3.391	33910	1.241	0.939
33626	5.176	5.023	33820	3.43	3.391	33970	1.241	0.94
33686	5.177	5.026	33880	3.43	3.391	34030	1.241	0.941
33746	5.176	5.03	33940	3.43	3.391	34090	1.241	0.942
33806	5.176	5.033	34000	3.43	3.392	34150	1.241	0.943
33866	5.176	5.037	34060	3.43	3.392	34210	1.241	0.943
33926	5.176	5.04	34120	3.43	3.392	34270	1.241	0.943
33986	5.176	5.044	34180	3.43	3.392	34330	1.241	0.945
34046	5.176	5.046	34240	3.43	3.393	34390	1.241	0.946
34106	5.176	5.049	34300	3.43	3.393	34450	1.24	0.947
34166	5.176	5.053	34360	3.43	3.393	34510	1.241	0.947
34226	5.176	5.055	34420	3.43	3.393	34570	1.24	0.949
34286	5.176	5.058	34480	3.43	3.393	34630	1.241	0.949
34346	5.176	5.06	34540	3.43	3.393	34690	1.241	0.95
34406	5.176	5.063	34600	3.43	3.393	34750	1.241	0.951
34466	5.176	5.066	34660	3.43	3.393	34810	1.241	0.952
34526	5.176	5.068	34720	3.43	3.394	34870	1.24	0.952
34586	5.176	5.071	34780	3.43	3.394	34930	1.241	0.953
34646	5.176	5.072	34840	3.43	3.394	34990	1.241	0.954
34706	5.176	5.074	34900	3.43	3.394	35050	1.24	0.955
34766	5.175	5.076	34960	3.43	3.395	35110	1.241	0.955
34826	5.175	5.078	35020	3.43	3.395	35170	1.241	0.956
34886	5.175	5.08	35080	3.43	3.395	35230	1.241	0.957
34946	5.176	5.082	35140	3.43	3.395	35290	1.24	0.958
35006	5.176	5.084	35200	3.43	3.395	35350	1.241	0.959
35066	5.175	5.086	35260	3.43	3.395	35410	1.24	0.959
35126	5.176	5.088	35320	3.43	3.395	35470	1.24	0.961
35186	5.176	5.089	35380	3.43	3.396	35530	1.241	0.961
35246	5.175	5.091	35440	3.43	3.396	35590	1.24	0.961
35306	5.176	5.092	35500	3.43	3.396	35650	1.241	0.962
35366	5.176	5.095	35560	3.43	3.396	35710	1.241	0.963
35426	5.175	5.096	35620	3.43	3.397	35770	1.24	0.964
35486	5.175	5.098	35680	3.43	3.397	35830	1.24	0.964
35546	5.175	5.099	35740	3.43	3.397	35890	1.24	0.965
35606	5.175	5.1	35800	3.43	3.397	35950	1.241	0.966
35666	5.176	5.101	35860	3.43	3.397	36010	1.24	0.967
35726	5.176	5.103	35920	3.43	3.397	36070	1.24	0.968
35786	5.176	5.104	35980	3.43	3.397	36130	1.241	0.969
35846	5.176	5.105	36040	3.431	3.397	36190	1.24	0.969
35906	5.175	5.107	36100	3.43	3.397	36250	1.24	0.97
35966	5.176	5.108	36160	3.43	3.397	36310	1.24	0.971
36026	5.175	5.109	36220	3.43	3.398	36370	1.24	0.972
36086	5.175	5.11	36280	3.431	3.397	36430	1.24	0.973
36146	5.176	5.111	36340	3.43	3.398	36490	1.24	0.973
36206	5.175	5.111	36400	3.43	3.398	36550	1.24	0.974
36266	5.176	5.112	36460	3.43	3.398	36610	1.24	0.974
36326	5.175	5.113	36520	3.429	3.398	36670	1.24	0.976
36386	5.175	5.114	36580	3.43	3.399	36730	1.24	0.976
36446	5.175	5.115	36640	3.43	3.399	36790	1.24	0.977
36506	5.175	5.116	36700	3.43	3.399	36850	1.24	0.978
36566	5.175	5.117	36760	3.43	3.399	36910	1.24	0.979
36626	5.175	5.117	36820	3.43	3.399	36970	1.241	0.979
36686	5.175	5.118	36880	3.43	3.399	37030	1.24	0.981
36746	5.175	5.119	36940	3.43	3.399	37090	1.24	0.981
36806	5.175	5.12	37000	3.43	3.399	37150	1.241	0.982
36866	5.175	5.121	37060	3.43	3.399	37210	1.24	0.982
36926	5.175	5.122	37120	3.43	3.4	37270	1.24	0.983
36986	5.175	5.122	37180	3.43	3.4	37330	1.24	0.984
37046	5.175	5.122	37240	3.43	3.4	37390	1.24	0.985
37106	5.175	5.123	37300	3.43	3.4	37450	1.24	0.985
37166	5.175	5.123	37360	3.43	3.4	37510	1.241	0.986
37226	5.174	5.125	37420	3.43	3.4	37570	1.24	0.987
37286	5.175	5.125	37480	3.431	3.4	37630	1.24	0.987
37346	5.175	5.125	37540	3.43	3.4	37690	1.24	0.988
37406	5.174	5.126	37600	3.43	3.4	37750	1.24	0.988
37466	5.175	5.126	37660	3.431	3.4	37810	1.24	0.989
37526	5.175	5.127	37720	3.43	3.4	37870	1.24	0.99
37586	5.175	5.127	37780	3.43	3.4	37930	1.24	0.991
37646	5.175	5.127	37840	3.43	3.4	37990	1.24	0.991
37706	5.175	5.128	37900	3.43	3.4	38050	1.24	0.992
37766	5.175	5.129	37960	3.43	3.401	38110	1.24	0.993
37826	5.175	5.129	38020	3.43	3.401	38170	1.24	0.994
37886	5.175	5.13	38080	3.43	3.401	38230	1.24	0.994
37946	5.175	5.13	38140	3.43	3.401	38290	1.24	0.994
38006	5.175	5.131	38200	3.43	3.402	38350	1.24	0.995
38066	5.175	5.131	38260	3.43	3.402	38410	1.24	0.997
38126	5.175	5.131	38320	3.43	3.401	38470	1.24	0.997
38186	5.175	5.131	38380	3.43	3.401	38530	1.24	0.998
38246	5.175	5.131	38440	3.43	3.402	38590	1.24	0.998
38306	5.175	5.132	38500	3.43	3.402	38650	1.24	0.999
38366	5.175	5.133	38560	3.431	3.402	38710	1.24	1
38426	5.175	5.133	38620	3.43	3.401	38770	1.24	1
38486	5.175	5.133	38680	3.43	3.402	38830	1.24	1.001
38546	5.175	5.134	38740	3.43	3.402	38890	1.24	1.001
38606	5.175	5.134	38800	3.431	3.402	38950	1.24	1.003
38666	5.175	5.134	38860	3.43	3.402	39010	1.24	1.003
38726	5.175	5.134	38920	3.431	3.402	39070	1.24	1.003
38786	5.176	5.135	38980	3.43	3.402	39130	1.24	1.005
38846	5.175	5.135	39040	3.43	3.403	39190	1.24	1.006
38906	5.175	5.135	39100	3.43	3.403	39250	1.24	1.006
38966	5.175	5.135	39160	3.431	3.403	39310	1.24	1.007
39026	5.175	5.136	39220	3.431	3.403	39370	1.24	1.008
39086	5.175	5.136	39280	3.43	3.403	39430	1.24	1.008
39146	5.175	5.136	39340	3.43	3.403	39490	1.239	1.009
39206	5.174	5.136	39400	3.43	3.403	39550	1.24	1.009
39266	5.175	5.136	39460	3.43	3.403	39610	1.24	1.009
39326	5.174	5.137	39520	3.43	3.403	39670	1.24	1.011
39386	5.175	5.137	39580	3.43	3.403	39730	1.24	1.012
39446	5.175	5.137	39640	3.431	3.403	39790	1.24	1.012
39506	5.175	5.137	39700	3.43	3.403	39850	1.239	1.013
39566	5.175	5.133	39760	3.431	3.403	39910	1.24	1.013
39626	5.175	5.123	39820	3.431	3.404	39970	1.24	1.014
39686	5.174	4.93	39880	3.43	3.404	40030	1.24	1.015
39746	5.174	4.944	39940	3.431	3.403	40090	1.24	1.015
39806	5.174	4.953	40000	3.43	3.404	40150	1.239	1.016
39866	5.174	4.96	40060	3.43	3.404	40210	1.239	1.016
39926	5.174	4.966	40120	3.43	3.404	40270	1.239	1.017
39986	5.173	4.973	40180	3.431	3.404	40330	1.239	1.018
40046	5.173	4.978	40240	3.43	3.404	40390	1.24	1.018
40106	5.174	4.983	40300	3.43	3.404	40450	1.24	1.019
40166	5.174	4.987	40360	3.43	3.404	40510	1.24	1.02
40226	5.173	4.992	40420	3.43	3.404	40570	1.239	1.021
40286	5.173	4.997	40480	3.43	3.404	40630	1.239	1.021
40346	5.173	5.001	40540	3.431	3.405	40690	1.24	1.022
40406	5.174	5.005	40600	3.431	3.404	40750	1.24	1.022
40466	5.173	5.009	40660	3.43	3.405	40810	1.238	1.023
40526	5.173	5.013	40720	3.43	3.405	40870	1.24	1.023
40586	5.172	5.017	40780	3.43	3.405	40930	1.239	1.024
40646	5.173	5.02	40840	3.43	3.405	40990	1.24	1.024
40706	5.173	5.025	40900	3.43	3.405	41050	1.239	1.025
40766	5.173	5.028	40960	3.43	3.405	41110	1.239	1.026
40826	5.172	5.032	41020	3.43	3.405	41170	1.239	1.027
40886	5.172	5.035	41080	3.429	3.405	41230	1.24	1.027
40946	5.173	5.038	41140	3.43	3.405	41290	1.238	1.027
41006	5.173	5.041	41200	3.431	3.405	41350	1.24	1.028
41066	5.172	5.044	41260	3.43	3.405	41410	1.239	1.029
41126	5.172	5.047	41320	3.43	3.406	41470	1.239	1.03
41186	5.172	5.05	41380	3.431	3.406	41530	1.239	1.03
41246	5.172	5.053	41440	3.431	3.406	41590	1.239	1.031
41306	5.172	5.055	41500	3.43	3.406	41650	1.24	1.031
41366	5.172	5.058	41560	3.43	3.406	41710	1.239	1.032
41426	5.172	5.06	41620	3.43	3.406	41770	1.24	1.033
41486	5.172	5.062	41680	3.43	3.406	41830	1.239	1.033
41546	5.172	5.065	41740	3.43	3.406	41890	1.239	1.034
41606	5.172	5.067	41800	3.43	3.406	41950	1.239	1.034
41666	5.172	5.069	41860	3.43	3.406	42010	1.239	1.035
41726	5.172	5.071	41920	3.43	3.406	42070	1.239	1.036
41786	5.172	5.074	41980	3.43	3.406	42130	1.24	1.036
41846	5.172	5.076	42040	3.43	3.406	42190	1.24	1.036
41906	5.172	5.078	42100	3.431	3.406	42250	1.239	1.037
41966	5.172	5.08	42160	3.43	3.406	42310	1.239	1.038
42026	5.172	5.082	42220	3.43	3.406	42370	1.24	1.039
42086	5.172	5.083	42280	3.43	3.406	42430	1.239	1.039
42146	5.172	5.085	42340	3.43	3.406	42490	1.24	1.039
42206	5.172	5.087	42400	3.43	3.406	42550	1.239	1.04
42266	5.172	5.088	42460	3.43	3.406	42610	1.239	1.041
42326	5.172	5.089	42520	3.43	3.406	42670	1.239	1.041
42386	5.172	5.091	42580	3.43	3.406	42730	1.239	1.042
42446	5.17	5.093	42640	3.43	3.406	42790	1.239	1.043
42506	5.172	5.094	42700	3.431	3.406	42850	1.24	1.043
42566	5.172	5.095	42760	3.43	3.406	42910	1.238	1.044
42626	5.171	5.096	42820	3.43	3.406	42970	1.239	1.044
42686	5.172	5.098	42880	3.43	3.406	43030	1.239	1.045
42746	5.172	5.099	42940	3.43	3.406	43090	1.239	1.045
42806	5.172	5.1	43000	3.43	3.406	43150	1.239	1.045
42866	5.172	5.101	43060	3.43	3.406	43210	1.239	1.046
42926	5.172	5.102	43120	3.43	3.406	43270	1.238	1.046
42986	5.172	5.104	43180	3.43	3.407	43330	1.238	1.048
43046	5.17	5.104	43240	3.43	3.407	43390	1.238	1.048
43106	5.171	5.106	43300	3.43	3.407	43450	1.238	1.048
43166	5.172	5.107	43360	3.43	3.407	43510	1.24	1.049
43226	5.172	5.108	43420	3.43	3.407	43570	1.239	1.049
43286	5.172	5.109	43480	3.431	3.407	43630	1.239	1.05
43346	5.171	5.11	43540	3.43	3.407	43690	1.238	1.05
43406	5.172	5.111	43600	3.43	3.407	43750	1.24	1.051
43466	5.172	5.112	43660	3.43	3.406	43810	1.239	1.051
43526	5.171	5.113	43720	3.43	3.407	43870	1.239	1.052
43586	5.171	5.113	43780	3.43	3.407	43930	1.238	1.053
43646	5.171	5.114	43840	3.43	3.406	43990	1.238	1.053
43706	5.171	5.115	43900	3.43	3.407	44050	1.239	1.054
43766	5.171	5.116	43960	3.43	3.408	44110	1.238	1.054
43826	5.171	5.116	44020	3.43	3.408	44170	1.238	1.054
43886	5.17	5.117	44080	3.43	3.408	44230	1.238	1.055
43946	5.171	5.118	44140	3.431	3.408	44290	1.238	1.055
44006	5.17	5.118	44200	3.43	3.408	44350	1.238	1.057
44066	5.17	5.109	44260	3.43	3.408	44410	1.239	1.057
44126	5.171	5.089	44320	3.43	3.408	44470	1.238	1.057
44186	5.17	4.92	44380	3.43	3.408	44530	1.239	1.058
44246	5.17	4.933	44440	3.43	3.408	44590	1.238	1.058
44306	5.169	4.942	44500	3.43	3.408	44650	1.239	1.059
44366	5.169	4.95	44560	3.43	3.408	44710	1.238	1.059
44426	5.17	4.956	44620	3.43	3.408	44770	1.238	1.06
44486	5.169	4.961	44680	3.43	3.408	44830	1.238	1.06
44546	5.169	4.968	44740	3.43	3.408	44890	1.238	1.061
44606	5.169	4.972	44800	3.43	3.408	44950	1.239	1.062
44666	5.17	4.978	44860	3.43	3.408	45010	1.238	1.062
44726	5.169	4.982	44920	3.429	3.408	45070	1.239	1.063
44786	5.169	4.987	44980	3.429	3.408	45130	1.237	1.063
44846	5.169	4.992	45040	3.43	3.408	45190	1.238	1.064
44906	5.169	4.997	45100	3.43	3.408	45250	1.239	1.064
44966	5.169	5.001	45160	3.43	3.408	45310	1.238	1.065
45026	5.169	5.005	45220	3.431	3.408	45370	1.238	1.065
45086	5.169	5.009	45280	3.43	3.409	45430	1.238	1.066
45146	5.169	5.013	45340	3.43	3.408	45490	1.238	1.067
45206	5.169	5.017	45400	3.43	3.408	45550	1.238	1.066
45266	5.169	5.02	45460	3.43	3.409	45610	1.238	1.067
45326	5.169	5.024	45520	3.43	3.409	45670	1.24	1.067
45386	5.169	5.028	45580	3.43	3.409	45730	1.238	1.069
45446	5.168	5.031	45640	3.431	3.409	45790	1.238	1.069
45506	5.168	5.034	45700	3.43	3.409	45850	1.238	1.07
45566	5.168	5.037	45760	3.43	3.409	45910	1.238	1.07
45626	5.168	5.04	45820	3.43	3.409	45970	1.238	1.07
45686	5.168	5.043	45880	3.429	3.409	46030	1.238	1.071
45746	5.168	5.045	45940	3.43	3.409	46090	1.238	1.071
45806	5.168	5.048	46000	3.43	3.409	46150	1.238	1.071
45866	5.168	5.051	46060	3.43	3.409	46210	1.238	1.072
45926	5.168	5.053	46120	3.43	3.409	46270	1.238	1.072
45986	5.168	5.056	46180	3.43	3.409	46330	1.238	1.073
46046	5.168	5.059	46240	3.43	3.409	46390	1.238	1.075
46106	5.168	5.062	46300	3.43	3.409	46450	1.238	1.075
46166	5.167	5.063	46360	3.43	3.409	46510	1.239	1.075
46226	5.167	5.065	46420	3.43	3.409	46570	1.238	1.075
46286	5.166	5.068	46480	3.43	3.409	46630	1.238	1.075
46346	5.167	5.069	46540	3.43	3.409	46690	1.238	1.076
46406	5.167	5.071	46600	3.43	3.409	46750	1.238	1.076
46466	5.166	5.073	46660	3.43	3.409	46810	1.238	1.077
46526	5.167	5.075	46720	3.43	3.409	46870	1.237	1.078
46586	5.167	5.077	46780	3.43	3.409	46930	1.238	1.078
46646	5.166	5.078	46840	3.43	3.409	46990	1.239	1.078
46706	5.167	5.08	46900	3.43	3.409	47050	1.238	1.079
46766	5.167	5.082	46960	3.43	3.409	47110	1.239	1.079
46826	5.167	5.084	47020	3.43	3.409	47170	1.238	1.08
46886	5.166	5.085	47080	3.43	3.409	47230	1.238	1.08
46946	5.167	5.086	47140	3.43	3.409	47290	1.238	1.081
47006	5.166	5.089	47200	3.43	3.409	47350	1.238	1.081
47066	5.166	5.089	47260	3.43	3.409	47410	1.238	1.081
47126	5.166	5.09	47320	3.43	3.4	47470	1.238	1.081
47186	5.166	5.092	47380	3.429	3.307	47530	1.238	1.082
47246	5.166	5.094	47440	3.43	3.315	47590	1.238	1.083
47306	5.166	5.095	47500	3.43	3.319	47650	1.238	1.084
47366	5.167	5.096	47560	3.43	3.323	47710	1.238	1.084
47426	5.166	5.097	47620	3.43	3.325	47770	1.238	1.085
47486	5.166	5.098	47680	3.43	3.327	47830	1.238	1.084
47546	5.166	5.099	47740	3.43	3.328	47890	1.238	1.085
47606	5.166	5.1	47800	3.429	3.329	47950	1.238	1.085
47666	5.166	5.102	47860	3.43	3.33	48010	1.238	1.087
47726	5.166	5.102	47920	3.43	3.331	48070	1.238	1.086
47786	5.166	5.104	47980	3.429	3.332	48130	1.238	1.087
47846	5.166	5.104	48040	3.43	3.332	48190	1.238	1.087
47906	5.166	5.105	48100	3.43	3.334	48250	1.238	1.088
47966	5.166	5.106	48160	3.43	3.334	48310	1.238	1.088
48026	5.166	5.107	48220	3.43	3.334	48370	1.238	1.088
48086	5.166	5.108	48280	3.43	3.336	48430	1.238	1.089
48146	5.166	5.108	48340	3.43	3.337	48490	1.238	1.089
48206	5.166	5.109	48400	3.43	3.337	48550	1.238	1.09
48266	5.166	5.11	48460	3.429	3.338	48610	1.238	1.09
48326	5.166	5.11	48520	3.43	3.339	48670	1.238	1.09
48386	5.166	5.112	48580	3.43	3.34	48730	1.238	1.091
48446	5.166	5.113	48640	3.43	3.34	48790	1.238	1.091
48506	5.166	5.107	48700	3.43	3.341	48850	1.238	1.093
48566	5.166	4.924	48760	3.43	3.342	48910	1.237	1.093
48626	5.166	4.937	48820	3.43	3.343	48970	1.238	1.093
48686	5.165	4.946	48880	3.43	3.343	49030	1.238	1.093
48746	5.166	4.954	48940	3.43	3.344	49090	1.238	1.094
48806	5.165	4.96	49000	3.43	3.345	49150	1.238	1.094
48866	5.165	4.965	49060	3.43	3.346	49210	1.238	1.095
48926	5.165	4.97	49120	3.43	3.346	49270	1.238	1.095
48986	5.164	4.975	49180	3.431	3.347	49330	1.238	1.096
49046	5.165	4.981	49240	3.43	3.347	49390	1.238	1.096
49106	5.165	4.985	49300	3.43	3.348	49450	1.238	1.096
49166	5.165	4.99	49360	3.43	3.349	49510	1.238	1.097
49226	5.165	4.994	49420	3.43	3.349	49570	1.238	1.097
49286	5.164	4.998	49480	3.43	3.35	49630	1.238	1.098
49346	5.164	5.002	49540	3.43	3.351	49690	1.237	1.098
49406	5.164	5.006	49600	3.43	3.351	49750	1.237	1.099
49466	5.164	5.01	49660	3.43	3.352	49810	1.238	1.099
49526	5.164	5.014	49720	3.431	3.352	49870	1.238	1.099
49586	5.164	5.017	49780	3.43	3.353	49930	1.238	1.099
49646	5.164	5.021	49840	3.43	3.354	49990	1.238	1.1
49706	5.164	5.024	49900	3.43	3.355	50050	1.238	1.101
49766	5.163	5.027	49960	3.43	3.355	50110	1.238	1.101
49826	5.165	5.031	50020	3.43	3.356	50170	1.238	1.102
49886	5.164	5.034	50080	3.43	3.356	50230	1.238	1.102
49946	5.164	5.037	50140	3.43	3.357	50290	1.238	1.102
50006	5.165	5.04	50200	3.43	3.357	50350	1.238	1.102
50066	5.165	5.043	50260	3.43	3.358	50410	1.237	1.102
50126	5.165	5.045	50320	3.431	3.358	50470	1.237	1.104
50186	5.166	5.048	50380	3.43	3.358	50530	1.238	1.104
50246	5.166	5.051	50440	3.43	3.358	50590	1.238	1.104
50306	5.166	5.053	50500	3.43	3.359	50650	1.238	1.105
50366	5.166	5.056	50560	3.43	3.36	50710	1.238	1.105
50426	5.167	5.059	50620	3.43	3.361	50770	1.238	1.105
50486	5.167	5.061	50680	3.43	3.361	50830	1.238	1.106
50546	5.168	5.064	50740	3.431	3.362	50890	1.238	1.106
50606	5.168	5.066	50800	3.43	3.363	50950	1.237	1.106
50666	5.169	5.068	50860	3.43	3.363	51010	1.238	1.107
50726	5.169	5.071	50920	3.431	3.363	51070	1.238	1.107
50786	5.169	5.072	50980	3.43	3.364	51130	1.238	1.108
50846	5.169	5.074	51040	3.43	3.364	51190	1.238	1.108
50906	5.169	5.077	51100	3.43	3.365	51250	1.237	1.108
50966	5.17	5.078	51160	3.43	3.365	51310	1.238	1.108
51026	5.17	5.08	51220	3.43	3.366	51370	1.237	1.109
51086	5.169	5.082	51280	3.43	3.366	51430	1.238	1.109
51146	5.17	5.084	51340	3.43	3.367	51490	1.238	1.11
51206	5.17	5.086	51400	3.43	3.367	51550	1.238	1.111
51266	5.17	5.088	51460	3.43	3.368	51610	1.237	1.111
51326	5.17	5.089	51520	3.43	3.368	51670	1.237	1.111
51386	5.17	5.09	51580	3.43	3.369	51730	1.237	1.111
51446	5.17	5.092	51640	3.429	3.369	51790	1.238	1.112
51506	5.17	5.093	51700	3.43	3.37	51850	1.238	1.112
51566	5.17	5.095	51760	3.43	3.37	51910	1.238	1.111
51626	5.17	5.096	51820	3.43	3.37	51970	1.238	1.113
51686	5.17	5.098	51880	3.43	3.37	52030	1.238	1.113
51746	5.17	5.099	51940	3.43	3.371	52090	1.237	1.114
51806	5.17	5.1	52000	3.43	3.372	52150	1.238	1.114
51866	5.17	5.101	52060	3.43	3.372	52210	1.238	1.114
51926	5.17	5.102	52120	3.43	3.373	52270	1.237	1.114
51986	5.169	5.103	52180	3.43	3.373	52330	1.237	1.115
52046	5.17	5.105	52240	3.43	3.373	52390	1.238	1.116
52106	5.169	5.107	52300	3.43	3.373	52450	1.237	1.116
52166	5.17	5.107	52360	3.43	3.374	52510	1.238	1.116
52226	5.169	5.108	52420	3.43	3.375	52570	1.238	1.117
52286	5.169	5.109	52480	3.43	3.375	52630	1.237	1.117
52346	5.17	5.11	52540	3.43	3.375	52690	1.238	1.117
52406	5.17	5.111	52600	3.43	3.375	52750	1.237	1.118
52466	5.169	5.112	52660	3.429	3.376	52810	1.238	1.118
52526	5.17	5.112	52720	3.43	3.376	52870	1.238	1.118
52586	5.17	5.113	52780	3.43	3.376	52930	1.237	1.119
52646	5.169	5.113	52840	3.43	3.376	52990	1.238	1.119
52706	5.169	5.114	52900	3.43	3.377	53050	1.238	1.119
52766	5.169	5.116	52960	3.43	3.378	53110	1.238	1.12
52826	5.169	5.116	53020	3.43	3.378	53170	1.238	1.12
52886	5.17	5.117	53080	3.43	3.379	53230	1.238	1.12
52946	5.17	5.118	53140	3.43	3.378	53290	1.237	1.12
53006	5.17	5.118	53200	3.43	3.379	53350	1.238	1.121
53066	5.169	5.118	53260	3.43	3.379	53410	1.238	1.121
53126	5.169	5.119	53320	3.43	3.379	53470	1.238	1.121
53186	5.17	5.12	53380	3.43	3.379	53530	1.237	1.122
53246	5.169	5.12	53440	3.43	3.38	53590	1.237	1.123
53306	5.169	5.121	53500	3.43	3.38	53650	1.237	1.123
53366	5.169	5.122	53560	3.43	3.381	53710	1.237	1.123
53426	5.169	5.122	53620	3.43	3.381	53770	1.238	1.123
53486	5.17	5.122	53680	3.43	3.382	53830	1.237	1.124
53546	5.17	5.123	53740	3.43	3.382	53890	1.237	1.124
53606	5.169	5.123	53800	3.43	3.382	53950	1.237	1.124
53666	5.169	5.125	53860	3.43	3.382	54010	1.237	1.125
53762	5.169	5.125	53920	3.43	3.383	54070	1.238	1.125
53822	5.171	5.125	53980	3.43	3.383	54130	1.237	1.125
53882	5.169	5.126	54040	3.43	3.383	54190	1.237	1.126
53942	5.169	5.126	54100	3.43	3.384	54250	1.238	1.126
54002	5.169	5.127	54160	3.43	3.384	54310	1.237	1.126
54062	5.169	5.127	54220	3.429	3.384	54370	1.237	1.126
54122	5.169	5.128	54280	3.43	3.384	54430	1.238	1.127
54182	5.169	5.128	54340	3.43	3.384	54490	1.238	1.127
54242	5.169	5.128	54400	3.43	3.385	54550	1.238	1.127
54302	5.17	5.128	54460	3.43	3.385	54610	1.237	1.128
54362	5.169	5.129	54520	3.43	3.385	54670	1.238	1.129
54422	5.169	5.13	54580	3.43	3.386	54730	1.237	1.129
54482	5.169	5.13	54640	3.43	3.386	54790	1.237	1.129
54542	5.169	5.13	54700	3.43	3.386	54850	1.238	1.129
54602	5.17	5.13	54760	3.43	3.387	54910	1.238	1.129
54662	5.169	5.13	54820	3.43	3.387	54970	1.237	1.13
54722	5.169	5.131	54880	3.43	3.387	55030	1.238	1.13
54782	5.169	5.131	54940	3.43	3.387	55090	1.237	1.13
54842	5.169	5.131	55000	3.43	3.388	55150	1.238	1.131
54902	5.17	5.131	55060	3.43	3.388	55210	1.237	1.131
54962	5.169	5.131	55120	3.43	3.388	55270	1.238	1.131
55022	5.169	5.131	55180	3.43	3.388	55330	1.238	1.132
55082	5.169	5.132	55240	3.43	3.388	55390	1.237	1.132
55142	5.169	5.133	55300	3.43	3.389	55450	1.237	1.132
55202	5.169	5.133	55360	3.43	3.39	55510	1.238	1.133
55262	5.169	5.133	55420	3.43	3.389	55570	1.238	1.133
55322	5.169	5.133	55480	3.43	3.39	55630	1.237	1.134
55382	5.169	5.133	55540	3.43	3.39	55690	1.238	1.134
55442	5.169	5.134	55600	3.429	3.391	55750	1.238	1.133
55502	5.169	5.134	55660	3.43	3.391	55810	1.238	1.134
55562	5.17	5.134	55720	3.43	3.391	55870	1.238	1.134
55622	5.169	5.133	55780	3.43	3.391	55930	1.238	1.135
55682	5.169	5.134	55840	3.429	3.391	55990	1.238	1.135
55742	5.169	5.134	55900	3.43	3.392	56050	1.238	1.135
55802	5.17	5.134	55960	3.43	3.391	56110	1.237	1.135
55862	5.169	5.134	56020	3.43	3.391	56170	1.237	1.135
55922	5.169	5.135	56080	3.43	3.392	56230	1.237	1.137
55982	5.169	5.135	56140	3.43	3.392	56290	1.238	1.137
56042	5.169	5.135	56200	3.43	3.392	56350	1.237	1.137
56102	5.169	5.135	56260	3.43	3.392	56410	1.237	1.138
56162	5.169	5.136	56320	3.429	3.392	56470	1.238	1.138
56222	5.169	5.136	56380	3.43	3.393	56530	1.237	1.138
56282	5.169	5.135	56440	3.43	3.393	56590	1.238	1.138
56342	5.169	5.136	56500	3.429	3.393	56650	1.237	1.138
56402	5.169	5.136	56560	3.43	3.393	56710	1.237	1.138
56462	5.169	5.136	56620	3.429	3.393	56770	1.238	1.139
56522	5.169	5.136	56680	3.429	3.394	56830	1.238	1.139
56582	5.169	5.136	56740	3.429	3.394	56890	1.237	1.139
56642	5.169	5.137	56800	3.43	3.394	56950	1.237	1.14
56702	5.169	5.137	56860	3.43	3.394	57010	1.238	1.139
56762	5.169	5.137	56920	3.43	3.394	57070	1.238	1.14
56822	5.169	5.137	56980	3.429	3.394	57130	1.237	1.141
56882	5.169	5.137	57040	3.429	3.395	57190	1.238	1.141
56942	5.169	5.137	57100	3.43	3.394	57250	1.237	1.141
57002	5.169	5.138	57160	3.429	3.396	57310	1.238	1.142
57062	5.169	5.137	57220	3.429	3.396	57370	1.238	1.142
57122	5.169	5.138	57280	3.43	3.395	57430	1.237	1.142
57182	5.169	5.138	57340	3.429	3.396	57490	1.237	1.142
57242	5.169	5.138	57400	3.429	3.396	57550	1.237	1.142
57302	5.169	5.138	57460	3.429	3.397	57610	1.238	1.143
57362	5.169	5.138	57520	3.43	3.396	57670	1.237	1.143
57422	5.169	5.138	57580	3.429	3.397	57730	1.237	1.144
57482	5.169	5.138	57640	3.43	3.397	57790	1.237	1.144
57542	5.169	5.138	57700	3.429	3.397	57850	1.237	1.144
57602	5.169	5.137	57760	3.43	3.397	57910	1.238	1.144
57662	5.169	5.138	57820	3.43	3.397	57970	1.238	1.144
57722	5.169	5.138	57880	3.429	3.397	58030	1.238	1.144
57782	5.169	5.138	57940	3.429	3.397	58090	1.237	1.144
57842	5.169	5.138	58000	3.43	3.397	58150	1.237	1.144
57902	5.169	5.138	58060	3.429	3.397	58210	1.238	1.146
57962	5.169	5.138	58120	3.43	3.398	58270	1.238	1.146
58022	5.169	5.138	58180	3.429	3.398	58330	1.237	1.146
58082	5.169	5.138	58240	3.429	3.398	58390	1.237	1.147
58142	5.169	5.138	58300	3.429	3.398	58450	1.237	1.147
58202	5.169	5.138	58360	3.429	3.399	58510	1.237	1.147
58262	5.169	5.138	58420	3.43	3.399	58570	1.238	1.147
58322	5.169	5.138	58480	3.43	3.399	58630	1.237	1.147
58382	5.169	5.138	58540	3.429	3.399	58690	1.238	1.147
58442	5.169	5.138	58600	3.429	3.399	58750	1.238	1.148
58502	5.169	5.138	58660	3.43	3.4	58810	1.238	1.148
58562	5.169	5.138	58720	3.429	3.4	58870	1.237	1.148
58622	5.169	5.138	58780	3.43	3.4	58930	1.237	1.149
58682	5.169	5.138	58840	3.429	3.4	58990	1.237	1.149
58742	5.169	5.138	58900	3.43	3.4	59050	1.237	1.149
58802	5.169	5.138	58960	3.43	3.4	59110	1.237	1.15
58862	5.169	5.138	59020	3.428	3.4	59170	1.237	1.15
58922	5.17	5.138	59080	3.429	3.4	59230	1.238	1.15
58982	5.168	5.139	59140	3.429	3.4	59290	1.238	1.15
59042	5.169	5.138	59200	3.429	3.4	59350	1.238	1.15
59102	5.169	5.139	59260	3.429	3.4	59410	1.237	1.151
59162	5.169	5.138	59320	3.429	3.396	59470	1.238	1.151
59222	5.169	5.139	59380	3.428	3.39	59530	1.238	1.151
59282	5.169	5.138	59440	3.429	3.309	59590	1.237	1.152
59342	5.169	5.138	59500	3.428	3.314	59650	1.238	1.152
59402	5.169	5.138	59560	3.429	3.318	59710	1.237	1.152
59462	5.169	5.138	59620	3.429	3.32	59770	1.238	1.152
59522	5.169	5.139	59680	3.429	3.322	59830	1.237	1.152
59582	5.17	5.138	59740	3.429	3.324	59890	1.237	1.153
59642	5.169	5.138	59800	3.429	3.325	59950	1.238	1.153
59702	5.169	5.139	59860	3.43	3.326	60010	1.238	1.153
59762	5.17	5.138	59920	3.429	3.326	60070	1.237	1.153
59822	5.169	5.139	59980	3.429	3.328	60130	1.237	1.153
59882	5.169	5.138	60040	3.429	3.328	60190	1.238	1.154
59942	5.169	5.138	60100	3.43	3.329	60250	1.238	1.154
60002	5.169	5.139	60160	3.429	3.331	60310	1.238	1.154
60062	5.169	5.138	60220	3.429	3.331	60370	1.237	1.155
60122	5.169	5.139	60280	3.43	3.332	60430	1.237	1.155
60182	5.169	5.139	60340	3.43	3.332	60490	1.237	1.155
60242	5.169	5.139	60400	3.43	3.334	60550	1.237	1.155
60302	5.169	5.139	60460	3.43	3.334	60610	1.237	1.156
60362	5.169	5.139	60520	3.43	3.335	60670	1.237	1.156
60422	5.169	5.139	60580	3.43	3.336	60730	1.238	1.156
60482	5.169	5.139	60640	3.429	3.337	60790	1.238	1.156
60542	5.169	5.139	60700	3.428	3.337	60850	1.237	1.156
60602	5.17	5.139	60760	3.43	3.338	60910	1.237	1.156
60662	5.169	5.139	60820	3.429	3.339	60970	1.237	1.157
60722	5.169	5.139	60880	3.43	3.34	61030	1.238	1.157
60782	5.169	5.139	60940	3.43	3.341	61090	1.238	1.157
60842	5.17	5.139	61000	3.429	3.341	61150	1.237	1.158
60902	5.17	5.139	61060	3.429	3.342	61210	1.237	1.158
60962	5.169	5.139	61120	3.429	3.342	61270	1.237	1.158
61022	5.169	5.139	61180	3.429	3.343	61330	1.238	1.158
61082	5.169	5.139	61240	3.429	3.343	61390	1.237	1.159
61142	5.169	5.138	61300	3.429	3.345	61450	1.237	1.159
61202	5.169	5.138	61360	3.429	3.346	61510	1.237	1.159
61262	5.169	5.138	61420	3.43	3.346	61570	1.238	1.159
61322	5.169	5.138	61480	3.43	3.346	61630	1.238	1.159
61382	5.17	5.138	61540	3.43	3.347	61690	1.237	1.159
61442	5.169	5.138	61600	3.429	3.348	61750	1.237	1.16
61502	5.169	5.138	61660	3.43	3.349	61810	1.237	1.16
61562	5.17	5.139	61720	3.429	3.349	61870	1.237	1.16
61622	5.169	5.138	61780	3.43	3.35	61930	1.238	1.161
61682	5.169	5.138	61840	3.429	3.351	61990	1.238	1.161
61742	5.169	5.138	61900	3.429	3.352	62050	1.237	1.161
61802	5.169	5.139	61960	3.429	3.352	62110	1.237	1.161
61862	5.169	5.138	62020	3.429	3.352	62170	1.237	1.161
61922	5.169	5.139	62080	3.429	3.353	62230	1.237	1.161
61982	5.169	5.139	62140	3.43	3.354	62290	1.238	1.162
62042	5.169	5.139	62200	3.429	3.354	62350	1.237	1.162
62102	5.169	5.138	62260	3.429	3.355	62410	1.237	1.162
62162	5.169	5.138	62320	3.43	3.355	62470	1.237	1.162
62222	5.169	5.138	62380	3.429	3.356	62530	1.237	1.162
62282	5.169	5.138	62440	3.429	3.357	62590	1.237	1.162
62342	5.169	5.138	62500	3.428	3.358	62650	1.237	1.163
62402	5.169	5.138	62560	3.429	3.358	62710	1.237	1.163
62462	5.169	5.139	62620	3.43	3.358	62770	1.238	1.163
62522	5.169	5.139	62680	3.429	3.359	62830	1.237	1.163
62582	5.169	5.138	62740	3.429	3.36	62890	1.238	1.164
62642	5.169	5.138	62800	3.429	3.36	62950	1.237	1.164
62702	5.169	5.138	62860	3.43	3.361	63010	1.238	1.164
62762	5.169	5.138	62920	3.429	3.361	63070	1.238	1.165
62822	5.169	5.138	62980	3.429	3.362	63130	1.237	1.165
62882	5.169	5.138	63040	3.429	3.363	63190	1.237	1.165
62942	5.169	5.138	63100	3.43	3.363	63250	1.238	1.165
63002	5.169	5.138	63160	3.429	3.364	63310	1.238	1.165
63062	5.169	5.138	63220	3.429	3.364	63370	1.237	1.165
63122	5.169	5.139	63280	3.429	3.364	63430	1.238	1.165
63182	5.169	5.139	63340	3.429	3.365	63490	1.237	1.166
63242	5.169	5.138	63400	3.43	3.365	63550	1.237	1.166
63302	5.169	5.138	63460	3.429	3.366	63610	1.238	1.166
63362	5.169	5.138	63520	3.43	3.366	63670	1.237	1.166
63422	5.169	5.138	63580	3.43	3.367	63730	1.237	1.166
63482	5.169	5.138	63640	3.429	3.367	63790	1.238	1.167
63542	5.169	5.138	63700	3.429	3.367	63850	1.237	1.167
63602	5.169	5.138	63760	3.429	3.368	63910	1.237	1.167
63662	5.169	5.138	63820	3.43	3.368	63970	1.237	1.168
63722	5.169	5.138	63880	3.43	3.369	64030	1.237	1.168
63782	5.169	5.138	63940	3.429	3.369	64090	1.238	1.167
63842	5.169	5.138	64000	3.429	3.37	64150	1.237	1.168
63902	5.169	5.138	64060	3.429	3.37	64210	1.237	1.168
63962	5.169	5.139	64120	3.429	3.37	64270	1.237	1.169
64022	5.169	5.139	64180	3.429	3.371	64330	1.237	1.168
64082	5.169	5.138	64240	3.429	3.371	64390	1.237	1.169
64142	5.169	5.138	64300	3.43	3.373	64450	1.237	1.169
64202	5.169	5.138	64360	3.429	3.373	64510	1.238	1.169
64262	5.169	5.138	64420	3.429	3.373	64570	1.237	1.169
64322	5.169	5.138	64480	3.429	3.373	64630	1.237	1.169
64382	5.169	5.138	64540	3.429	3.373	64690	1.237	1.17
64442	5.169	5.138	64600	3.43	3.373	64750	1.237	1.17
64502	5.169	5.138	64660	3.429	3.374	64810	1.237	1.17
64562	5.169	5.138	64720	3.429	3.374	64870	1.237	1.17
64622	5.169	5.138	64780	3.429	3.375	64930	1.238	1.171
64682	5.169	5.138	64840	3.43	3.375	64990	1.237	1.171
64742	5.17	5.138	64900	3.429	3.375	65050	1.238	1.171
64802	5.169	5.138	64960	3.429	3.375	65110	1.237	1.171
64862	5.169	5.138	65020	3.43	3.376	65170	1.238	1.171
64922	5.169	5.138	65080	3.43	3.377	65230	1.237	1.171
64982	5.169	5.138	65140	3.429	3.376	65290	1.237	1.172
65042	5.169	5.138	65200	3.43	3.376	65350	1.237	1.172
65102	5.169	5.138	65260	3.429	3.377	65410	1.238	1.173
65162	5.169	5.138	65320	3.429	3.377	65470	1.237	1.173
65222	5.169	5.138	65380	3.429	3.378	65530	1.238	1.173
65282	5.169	5.138	65440	3.43	3.378	65590	1.237	1.173
65342	5.169	5.138	65500	3.429	3.379	65650	1.238	1.173
65402	5.169	5.138	65560	3.429	3.379	65710	1.237	1.173
65462	5.169	5.138	65620	3.43	3.379	65770	1.238	1.174
65522	5.169	5.138	65680	3.429	3.379	65830	1.238	1.174
65582	5.169	5.138	65740	3.429	3.38	65890	1.238	1.174
65642	5.169	5.138	65800	3.429	3.379	65950	1.238	1.174
65702	5.169	5.138	65860	3.43	3.379	66010	1.238	1.174
65762	5.169	5.138	65920	3.429	3.381	66070	1.237	1.174
65822	5.169	5.137	65980	3.429	3.381	66130	1.238	1.175
65882	5.169	5.138	66040	3.43	3.381	66190	1.237	1.175
65942	5.17	5.137	66100	3.429	3.382	66250	1.238	1.175
66002	5.169	5.138	66160	3.429	3.382	66310	1.238	1.175
66062	5.169	5.137	66220	3.43	3.382	66370	1.237	1.175
66122	5.169	5.138	66280	3.43	3.382	66430	1.238	1.176
66182	5.169	5.137	66340	3.429	3.382	66490	1.237	1.176
66242	5.169	5.137	66400	3.429	3.382	66550	1.237	1.176
66302	5.169	5.137	66460	3.429	3.382	66610	1.237	1.176
66362	5.169	5.138	66520	3.429	3.383	66670	1.237	1.177
66422	5.169	5.137	66580	3.429	3.383	66730	1.237	1.177
66482	5.169	5.138	66640	3.43	3.384	66790	1.237	1.176
66542	5.169	5.138	66700	3.429	3.384	66850	1.237	1.177
66602	5.169	5.137	66760	3.43	3.384	66910	1.237	1.177
66662	5.169	5.137	66820	3.43	3.385	66970	1.237	1.177
66722	5.169	5.137	66880	3.43	3.385	67030	1.237	1.177
66782	5.169	5.137	66940	3.43	3.385	67090	1.237	1.177
66842	5.169	5.138	67000	3.429	3.385	67150	1.238	1.178
66902	5.169	5.137	67060	3.43	3.385	67210	1.237	1.178
66962	5.169	5.137	67120	3.429	3.386	67270	1.237	1.178
67022	5.169	5.137	67180	3.43	3.386	67330	1.237	1.178
67082	5.169	5.137	67240	3.43	3.386	67390	1.237	1.178
67142	5.169	5.137	67300	3.429	3.386	67450	1.237	1.179
67202	5.169	5.137	67360	3.429	3.387	67510	1.237	1.179
67262	5.169	5.137	67420	3.43	3.387	67570	1.238	1.179
67322	5.169	5.137	67480	3.429	3.387	67630	1.237	1.179
67382	5.169	5.138	67540	3.429	3.387	67690	1.238	1.179
67442	5.169	5.137	67600	3.429	3.388	67750	1.237	1.18
67502	5.169	5.137	67660	3.429	3.388	67810	1.237	1.18
67562	5.168	5.137	67720	3.43	3.388	67870	1.238	1.18
67622	5.169	5.137	67780	3.43	3.388	67930	1.237	1.18
67682	5.169	5.137	67840	3.43	3.388	67990	1.237	1.18
67742	5.169	5.137	67900	3.43	3.389	68050	1.238	1.18
67802	5.169	5.137	67960	3.429	3.39	68110	1.237	1.18
67862	5.169	5.137	68020	3.43	3.389	68170	1.238	1.181
67922	5.169	5.137	68080	3.429	3.39	68230	1.237	1.18
67982	5.169	5.138	68140	3.429	3.39	68290	1.237	1.181
68042	5.169	5.137	68200	3.43	3.39	68350	1.238	1.181
68102	5.168	5.137	68260	3.43	3.391	68410	1.237	1.181
68162	5.168	5.137	68320	3.429	3.391	68470	1.238	1.182
68222	5.168	5.137	68380	3.43	3.391	68530	1.238	1.181
68282	5.169	5.137	68440	3.429	3.391	68590	1.237	1.182
68342	5.169	5.137	68500	3.429	3.391	68650	1.238	1.182
68402	5.169	5.137	68560	3.429	3.391	68710	1.238	1.182
68462	5.168	5.137	68620	3.429	3.391	68770	1.238	1.182
68522	5.168	5.138	68680	3.43	3.392	68830	1.237	1.183
68582	5.169	5.137	68740	3.43	3.392	68890	1.238	1.183
68642	5.169	5.137	68800	3.429	3.392	68950	1.238	1.183
68702	5.169	5.137	68860	3.43	3.393	69010	1.237	1.183
68762	5.169	5.137	68920	3.429	3.392	69070	1.237	1.183
68822	5.169	5.138	68980	3.43	3.393	69130	1.237	1.183
68882	5.169	5.137	69040	3.429	3.393	69190	1.237	1.183
68942	5.169	5.137	69100	3.43	3.393	69250	1.238	1.183
69002	5.168	5.138	69160	3.43	3.393	69310	1.237	1.184
69062	5.168	5.138	69220	3.429	3.393	69370	1.238	1.184
69122	5.169	5.137	69280	3.43	3.393	69430	1.237	1.184
69182	5.168	5.138	69340	3.43	3.394	69490	1.237	1.184
69242	5.168	5.138	69400	3.43	3.394	69550	1.237	1.184
69302	5.168	5.138	69460	3.429	3.394	69610	1.237	1.184
69362	5.169	5.138	69520	3.429	3.394	69670	1.237	1.184
69422	5.169	5.138	69580	3.429	3.393	69730	1.237	1.185
69482	5.169	5.138	69640	3.43	3.394	69790	1.237	1.185
69542	5.169	5.137	69700	3.43	3.394	69850	1.238	1.185
69602	5.168	5.137	69760	3.43	3.395	69910	1.238	1.185
69662	5.169	5.137	69820	3.429	3.394	69970	1.237	1.185
69722	5.169	5.137	69880	3.429	3.395	70030	1.237	1.185
69782	5.169	5.138	69940	3.43	3.395	70090	1.237	1.185
69842	5.168	5.137	70000	3.43	3.395	70150	1.237	1.186
69902	5.169	5.137	70060	3.43	3.395	70210	1.238	1.186
69962	5.169	5.137	70120	3.429	3.395	70270	1.237	1.186
70022	5.169	5.137	70180	3.429	3.396	70330	1.238	1.186
70082	5.168	5.137	70240	3.429	3.395	70390	1.237	1.186
70142	5.168	5.137	70300	3.429	3.395	70450	1.237	1.186
70202	5.169	5.137	70360	3.429	3.396	70510	1.237	1.187
70262	5.169	5.137	70420	3.429	3.396	70570	1.238	1.186
70322	5.169	5.138	70480	3.429	3.396	70630	1.237	1.187
70382	5.169	5.137	70540	3.43	3.397	70690	1.237	1.187
70442	5.17	5.137	70600	3.429	3.397	70750	1.237	1.187
70502	5.17	5.138	70660	3.43	3.397	70810	1.237	1.187
70562	5.171	5.137	70720	3.429	3.396	70870	1.237	1.187
70622	5.171	5.138	70780	3.429	3.397	70930	1.237	1.188
70682	5.172	5.138	70840	3.43	3.397	70990	1.237	1.188
70742	5.172	5.138	70900	3.43	3.397	71050	1.238	1.187
70802	5.172	5.139	70960	3.43	3.397	71110	1.237	1.188
70862	5.173	5.138	71020	3.429	3.397	71170	1.237	1.188
70922	5.173	5.138	71080	3.43	3.397	71230	1.237	1.189
70982	5.173	5.139	71140	3.429	3.397	71290	1.238	1.189
71042	5.174	5.139	71200	3.429	3.397	71350	1.238	1.189
71102	5.174	5.139	71260	3.43	3.397	71410	1.237	1.189
71162	5.174	5.139	71320	3.429	3.397	71470	1.238	1.189
71222	5.175	5.139	71380	3.43	3.397	71530	1.237	1.189
71282	5.175	5.139	71440	3.429	3.398	71590	1.237	1.189
71342	5.175	5.139	71500	3.429	3.398	71650	1.238	1.189
71402	5.175	5.139	71560	3.429	3.399	71710	1.237	1.189
71462	5.175	5.139	71620	3.429	3.399	71770	1.237	1.189
71522	5.176	5.14	71680	3.429	3.399	71830	1.238	1.189
71582	5.175	5.14	71740	3.43	3.399	71890	1.238	1.19
71642	5.175	5.14	71800	3.429	3.399	71950	1.238	1.189
71702	5.175	5.14	71860	3.429	3.4	72010	1.237	1.19
71762	5.176	5.14	71920	3.429	3.399	72070	1.237	1.19
71822	5.175	5.14	71980	3.429	3.4	72130	1.237	1.19
71882	5.174	5.14	72040	3.429	3.4	72190	1.237	1.191
71942	5.175	5.14	72100	3.429	3.4	72250	1.237	1.19
72002	5.175	5.141	72160	3.43	3.4	72310	1.237	1.191
72062	5.175	5.14	72220	3.429	3.4	72370	1.237	1.191
72122	5.175	5.14	72280	3.429	3.4	72430	1.238	1.192
72182	5.175	5.141	72340	3.429	3.4	72490	1.237	1.192
72242	5.175	5.141	72400	3.429	3.4	72550	1.237	1.192
72302	5.175	5.14	72460	3.429	3.4	72610	1.237	1.192
72362	5.175	5.141	72520	3.43	3.401	72670	1.238	1.191
72422	5.175	5.141	72580	3.429	3.4	72730	1.237	1.192
72482	5.174	5.141	72640	3.429	3.401	72790	1.237	1.192
72542	5.175	5.141	72700	3.429	3.401	72850	1.238	1.192
72602	5.175	5.142	72760	3.429	3.401	72910	1.237	1.192
72662	5.174	5.142	72820	3.43	3.401	72970	1.237	1.193
72722	5.175	5.142	72880	3.429	3.401	73030	1.237	1.193
72782	5.175	5.142	72940	3.43	3.402	73090	1.237	1.193
72842	5.175	5.142	73000	3.429	3.402	73150	1.237	1.193
72902	5.175	5.142	73060	3.429	3.402	73210	1.238	1.193
72962	5.175	5.142	73120	3.43	3.402	73270	1.237	1.193
73022	5.175	5.142	73180	3.429	3.401	73330	1.237	1.193
73082	5.174	5.142	73240	3.43	3.401	73390	1.238	1.194
73142	5.175	5.142	73300	3.429	3.402	73450	1.237	1.194
73202	5.175	5.142	73360	3.429	3.402	73510	1.237	1.194
73262	5.175	5.142	73420	3.429	3.402	73570	1.237	1.194
73322	5.175	5.143	73480	3.429	3.402	73630	1.238	1.194
73382	5.175	5.143	73540	3.429	3.403	73690	1.237	1.195
73442	5.175	5.143	73600	3.43	3.403	73750	1.237	1.194
73502	5.174	5.143	73660	3.43	3.401	73810	1.237	1.194
73562	5.174	5.143	73720	3.429	3.309	73870	1.237	1.195
73622	5.174	5.143	73780	3.429	3.315	73930	1.237	1.194
73682	5.175	5.143	73840	3.428	3.318	73990	1.237	1.195
73742	5.175	5.143	73900	3.429	3.32	74050	1.238	1.195
73802	5.174	5.143	73960	3.429	3.322	74110	1.237	1.195
73862	5.175	5.143	74020	3.429	3.323	74170	1.237	1.195
73922	5.174	5.143	74080	3.429	3.324	74230	1.237	1.195
73982	5.174	5.143	74140	3.429	3.325	74290	1.237	1.195
74042	5.175	5.143	74200	3.429	3.326	74350	1.237	1.195
74102	5.174	5.143	74260	3.428	3.328	74410	1.237	1.195
74162	5.175	5.143	74320	3.429	3.328	74470	1.237	1.195
74222	5.174	5.143	74380	3.429	3.329	74530	1.237	1.195
74282	5.175	5.143	74440	3.429	3.33	74590	1.237	1.195
74342	5.174	5.143	74500	3.429	3.33	74650	1.237	1.196
74402	5.175	5.143	74560	3.43	3.331	74710	1.237	1.196
74462	5.175	5.143	74620	3.429	3.332	74770	1.238	1.196
74522	5.175	5.143	74680	3.429	3.334	74830	1.238	1.196
74582	5.175	5.144	74740	3.429	3.334	74890	1.238	1.196
74642	5.174	5.143	74800	3.429	3.334	74950	1.237	1.196
74702	5.175	5.143	74860	3.429	3.335	75010	1.237	1.196
74762	5.174	5.143	74920	3.429	3.336	75070	1.238	1.196
74822	5.174	5.143	74980	3.429	3.337	75130	1.237	1.196
74882	5.174	5.143	75040	3.429	3.337	75190	1.237	1.196
74942	5.174	5.143	75100	3.429	3.338	75250	1.237	1.197
75002	5.174	5.143	75160	3.428	3.339	75310	1.238	1.197
75062	5.174	5.143	75220	3.429	3.34	75370	1.237	1.197
75122	5.174	5.143	75280	3.429	3.341	75430	1.237	1.197
75182	5.174	5.144	75340	3.429	3.341	75490	1.237	1.197
75242	5.174	5.143	75400	3.43	3.342	75550	1.237	1.197
75302	5.174	5.143	75460	3.429	3.343	75610	1.237	1.197
75362	5.174	5.143	75520	3.429	3.343	75670	1.238	1.198
75422	5.175	5.143	75580	3.429	3.344	75730	1.238	1.197
75482	5.174	5.143	75640	3.429	3.345	75790	1.237	1.198
75542	5.174	5.143	75700	3.429	3.346	75850	1.237	1.198
75602	5.174	5.143	75760	3.429	3.346	75910	1.238	1.198
75662	5.174	5.143	75820	3.429	3.347	75970	1.238	1.198
75722	5.174	5.143	75880	3.429	3.348	76030	1.237	1.198
75782	5.174	5.143	75940	3.428	3.348	76090	1.238	1.198
75842	5.173	5.143	76000	3.428	3.349	76150	1.238	1.198
75902	5.174	5.143	76060	3.429	3.349	76210	1.238	1.198
75962	5.173	5.143	76120	3.429	3.351	76270	1.238	1.198
76022	5.174	5.143	76180	3.429	3.351	76330	1.238	1.198
76082	5.174	5.143	76240	3.429	3.351	76390	1.238	1.198
76142	5.173	5.143	76300	3.429	3.352	76450	1.238	1.198
76202	5.173	5.143	76360	3.429	3.352	76510	1.237	1.198
76262	5.173	5.143	76420	3.429	3.353	76570	1.238	1.198
76322	5.173	5.143	76480	3.429	3.354	76630	1.237	1.198
76382	5.173	5.143	76540	3.429	3.355	76690	1.238	1.199
76442	5.173	5.143	76600	3.43	3.355	76750	1.237	1.199
76502	5.173	5.143	76660	3.429	3.355	76810	1.238	1.199
76562	5.174	5.144	76720	3.429	3.356	76870	1.238	1.199
76622	5.174	5.143	76780	3.429	3.355	76930	1.238	1.2
76682	5.173	5.143	76840	3.429	3.357	76990	1.237	1.199
76742	5.173	5.144	76900	3.429	3.358	77050	1.238	1.2
76802	5.173	5.143	76960	3.429	3.358	77110	1.238	1.199
76862	5.173	5.144	77020	3.429	3.358	77170	1.237	1.2
76922	5.173	5.143	77080	3.429	3.359	77230	1.239	1.2
76982	5.173	5.143	77140	3.429	3.36	77290	1.237	1.2
77042	5.174	5.143	77200	3.429	3.36	77350	1.238	1.2
77102	5.173	5.143	77260	3.429	3.361	77410	1.237	1.198
77162	5.173	5.143	77320	3.429	3.361	77470	1.238	1.154
77222	5.173	5.143	77380	3.429	3.361	77530	1.237	1.156
77282	5.173	5.143	77440	3.429	3.361	77590	1.238	1.156
77342	5.173	5.143	77500	3.429	3.362	77650	1.237	1.157
77402	5.173	5.143	77560	3.43	3.362	77710	1.237	1.158
77462	5.174	5.143	77620	3.429	3.364	77770	1.237	1.158
77522	5.173	5.143	77680	3.429	3.364	77830	1.237	1.158
77582	5.173	5.143	77740	3.429	3.364	77890	1.237	1.159
77642	5.173	5.143	77800	3.429	3.365	77950	1.237	1.159
77702	5.174	5.143	77860	3.429	3.365	78010	1.237	1.159
77762	5.173	5.143	77920	3.429	3.366	78070	1.237	1.159
77822	5.173	5.143	77980	3.43	3.366	78130	1.238	1.16
77882	5.173	5.143	78040	3.428	3.367	78190	1.237	1.16
77942	5.173	5.143	78100	3.43	3.367	78250	1.238	1.16
78002	5.173	5.143	78160	3.429	3.367	78310	1.238	1.16
78062	5.173	5.143	78220	3.429	3.368	78370	1.238	1.16
78122	5.173	5.143	78280	3.429	3.368	78430	1.237	1.161
78182	5.173	5.143	78340	3.429	3.368	78490	1.238	1.161
78242	5.172	5.143	78400	3.429	3.369	78550	1.238	1.161
78302	5.172	5.143	78460	3.43	3.37	78610	1.238	1.161
78362	5.172	5.143	78520	3.429	3.37	78670	1.237	1.161
78422	5.173	5.143	78580	3.429	3.37	78730	1.237	1.162
78482	5.173	5.143	78640	3.429	3.37	78790	1.238	1.162
78542	5.173	5.144	78700	3.429	3.371	78850	1.238	1.162
78602	5.173	5.144	78760	3.429	3.372	78910	1.237	1.162
78662	5.174	5.144	78820	3.428	3.372	78970	1.238	1.162
78722	5.173	5.144	78880	3.429	3.373	79030	1.238	1.163
78782	5.172	5.144	78940	3.429	3.373	79090	1.238	1.163
78842	5.172	5.143	79000	3.429	3.373	79150	1.238	1.163
78902	5.173	5.143	79060	3.429	3.374	79210	1.238	1.164
78962	5.172	5.143	79120	3.429	3.374	79270	1.238	1.164
79022	5.172	5.143	79180	3.429	3.374	79330	1.238	1.164
79082	5.172	5.143	79240	3.429	3.375	79390	1.238	1.164
79142	5.172	5.143	79300	3.429	3.375	79450	1.238	1.165
79202	5.172	5.143	79360	3.428	3.376	79510	1.237	1.165
79262	5.173	5.143	79420	3.429	3.376	79570	1.237	1.165
79322	5.173	5.143	79480	3.429	3.376	79630	1.238	1.165
79382	5.173	5.143	79540	3.428	3.376	79690	1.238	1.165
79442	5.173	5.143	79600	3.429	3.377	79750	1.238	1.165
79502	5.173	5.143	79660	3.43	3.377	79810	1.238	1.166
79562	5.172	5.143	79720	3.428	3.378	79870	1.238	1.165
79622	5.172	5.143	79780	3.429	3.378	79930	1.238	1.166
79682	5.172	5.143	79840	3.429	3.378	79990	1.237	1.166
79742	5.172	5.143	79900	3.429	3.379	80050	1.238	1.166
79802	5.172	5.143	79960	3.429	3.379	80110	1.238	1.166
79862	5.172	5.143	80020	3.428	3.379	80170	1.238	1.166
79922	5.172	5.143	80080	3.428	3.379	80230	1.238	1.167
79982	5.172	5.143	80140	3.429	3.379	80290	1.237	1.167
80042	5.172	5.143	80200	3.429	3.38	80350	1.237	1.168
80102	5.172	5.143	80260	3.429	3.381	80410	1.238	1.168
80162	5.172	5.143	80320	3.429	3.381	80470	1.238	1.168
80222	5.172	5.143	80380	3.43	3.382	80530	1.237	1.168
80282	5.172	5.143	80440	3.429	3.382	80590	1.238	1.168
80342	5.172	5.143	80500	3.429	3.382	80650	1.238	1.168
80402	5.171	5.143	80560	3.429	3.382	80710	1.238	1.168
80462	5.172	5.143	80620	3.429	3.382	80770	1.238	1.169
80522	5.171	5.143	80680	3.429	3.382	80830	1.238	1.169
80582	5.172	5.143	80740	3.429	3.383	80890	1.238	1.169
80642	5.172	5.143	80800	3.428	3.383	80950	1.237	1.169
80702	5.172	5.143	80860	3.429	3.383	81010	1.238	1.17
80762	5.172	5.143	80920	3.428	3.384	81070	1.238	1.17
80822	5.172	5.143	80980	3.428	3.384	81130	1.238	1.17
80882	5.172	5.143	81040	3.429	3.384	81190	1.237	1.17
80942	5.172	5.143	81100	3.428	3.384	81250	1.237	1.171
81002	5.172	5.143	81160	3.429	3.385	81310	1.237	1.17
81062	5.172	5.143	81220	3.428	3.385	81370	1.238	1.171
81122	5.172	5.143	81280	3.428	3.385	81430	1.238	1.171
81182	5.172	5.143	81340	3.428	3.385	81490	1.238	1.171
81242	5.172	5.143	81400	3.429	3.385	81550	1.238	1.171
81302	5.172	5.143	81460	3.428	3.386	81610	1.239	1.171
81362	5.172	5.143	81520	3.429	3.387	81670	1.238	1.171
81422	5.172	5.143	81580	3.429	3.387	81730	1.238	1.171
81482	5.172	5.143	81640	3.429	3.387	81790	1.238	1.172
81542	5.172	5.143	81700	3.429	3.387	81850	1.238	1.171
81602	5.172	5.143	81760	3.428	3.387	81910	1.238	1.173
81662	5.172	5.143	81820	3.43	3.387	81970	1.238	1.172
81722	5.172	5.143	81880	3.429	3.388	82030	1.238	1.173
81782	5.172	5.143	81940	3.428	3.388	82090	1.238	1.173
81842	5.171	5.143	82000	3.428	3.388	82150	1.238	1.173
81902	5.172	5.143	82060	3.43	3.388	82210	1.238	1.173
81962	5.172	5.143	82120	3.428	3.388	82270	1.238	1.173
82022	5.172	5.143	82180	3.428	3.389	82330	1.237	1.173
82082	5.172	5.143	82240	3.428	3.389	82390	1.238	1.174
82142	5.172	5.143	82300	3.429	3.389	82450	1.238	1.174
82202	5.172	5.143	82360	3.429	3.389	82510	1.238	1.174
82262	5.172	5.143	82420	3.429	3.39	82570	1.238	1.174
82322	5.172	5.143	82480	3.428	3.39	82630	1.237	1.174
82382	5.172	5.143	82540	3.428	3.391	82690	1.237	1.174
82442	5.172	5.143	82600	3.428	3.391	82750	1.238	1.175
82502	5.172	5.143	82660	3.428	3.391	82810	1.238	1.175
82562	5.172	5.143	82720	3.428	3.391	82870	1.238	1.175
82622	5.171	5.143	82780	3.429	3.391	82930	1.238	1.174
82682	5.172	5.143	82840	3.428	3.391	82990	1.238	1.175
82742	5.171	5.143	82900	3.429	3.391	83050	1.238	1.175
82802	5.171	5.143	82960	3.428	3.391	83110	1.238	1.175
82862	5.172	5.143	83020	3.428	3.392	83170	1.237	1.176
82922	5.172	5.143	83080	3.429	3.392	83230	1.237	1.176
83055	5.172	5.143	83140	3.429	3.392	83290	1.238	1.176
83115	5.172	5.143	83200	3.429	3.392	83350	1.237	1.177
83175	5.172	5.143	83260	3.428	3.392	83410	1.238	1.176
83235	5.172	5.138	83320	3.429	3.391	83470	1.238	1.177
83295	5.171	4.917	83380	3.428	3.337	83530	1.237	1.177
83355	5.172	4.93	83440	3.428	3.305	83590	1.238	1.177
83415	5.17	4.94	83500	3.428	3.31	83650	1.237	1.177
83475	5.17	4.948	83560	3.428	3.314	83710	1.238	1.177
83535	5.17	4.954	83620	3.428	3.316	83770	1.237	1.177
83595	5.169	4.96	83680	3.428	3.317	83830	1.237	1.177
83655	5.17	4.966	83740	3.428	3.319	83890	1.238	1.177
83715	5.169	4.971	83800	3.428	3.319	83950	1.237	1.177
83775	5.17	4.976	83860	3.428	3.321	84010	1.238	1.178
83835	5.169	4.981	83920	3.428	3.322	84070	1.237	1.178
83895	5.17	4.986	83980	3.428	3.323	84130	1.238	1.178
83955	5.17	4.99	84040	3.428	3.323	84190	1.238	1.178
84015	5.169	4.996	84100	3.429	3.324	84250	1.237	1.179
84075	5.17	4.999	84160	3.428	3.325	84310	1.237	1.179
84135	5.169	5.004	84220	3.428	3.326	84370	1.237	1.179
84195	5.169	5.008	84280	3.428	3.327	84430	1.238	1.18
84255	5.169	5.012	84340	3.429	3.328	84490	1.237	1.179
84315	5.169	5.015	84400	3.428	3.328	84550	1.237	1.18
84375	5.169	5.019	84460	3.428	3.329	84610	1.237	1.18
84435	5.169	5.023	84520	3.428	3.33	84670	1.238	1.18
84495	5.169	5.026	84580	3.429	3.331	84730	1.238	1.18
84555	5.169	5.03	84640	3.429	3.331	84790	1.238	1.18
84615	5.169	5.033	84700	3.428	3.332	84850	1.237	1.18
84675	5.169	5.036	84760	3.429	3.333	84910	1.238	1.18
84735	5.169	5.04	84820	3.428	3.334	84970	1.237	1.181
84795	5.169	5.042	84880	3.428	3.334	85030	1.238	1.18
84855	5.169	5.045	84940	3.429	3.335	85090	1.237	1.18
84915	5.169	5.048	85000	3.428	3.336	85150	1.237	1.181
84975	5.168	5.05	85060	3.428	3.337	85210	1.237	1.182
85035	5.169	5.053	85120	3.429	3.337	85270	1.237	1.182
85095	5.169	5.056	85180	3.429	3.338	85330	1.238	1.182
85155	5.169	5.059	85240	3.428	3.339	85390	1.237	1.182
85215	5.169	5.061	85300	3.429	3.339	85450	1.238	1.182
85275	5.168	5.063	85360	3.428	3.34	85510	1.237	1.182
85335	5.169	5.066	85420	3.429	3.341	85570	1.238	1.183
85395	5.168	5.068	85480	3.428	3.341	85630	1.238	1.183
85455	5.169	5.071	85540	3.429	3.342	85690	1.238	1.183
85515	5.168	5.072	85600	3.428	3.343	85750	1.238	1.183
85575	5.168	5.074	85660	3.428	3.343	85810	1.238	1.183
85635	5.168	5.077	85720	3.428	3.343	85870	1.237	1.184
85695	5.168	5.078	85780	3.429	3.345	85930	1.237	1.183
85755	5.168	5.08	85840	3.428	3.345	85990	1.237	1.183
85815	5.169	5.082	85900	3.428	3.346	86050	1.237	1.183
85875	5.168	5.083	85960	3.428	3.346	86110	1.237	1.184
85935	5.167	5.085	86020	3.429	3.347	86170	1.237	1.184
85995	5.168	5.086	86080	3.429	3.348	86230	1.239	1.184
86055	5.166	5.089	86140	3.428	3.348	86290	1.237	1.185
86115	5.168	5.09	86200	3.428	3.35	86350	1.237	1.185
86175	5.168	5.091	86260	3.429	3.349	86410	1.238	1.184
86235	5.168	5.093	86320	3.428	3.35	86470	1.238	1.185
86295	5.167	5.094	86380	3.428	3.351	86530	1.238	1.185
86355	5.166	5.095	86440	3.43	3.352	86590	1.238	1.186
86415	5.166	5.097	86500	3.429	3.352	86650	1.237	1.186
86475	5.166	5.098	86560	3.429	3.352	86710	1.238	1.186
86535	5.167	5.1	86620	3.428	3.353	86770	1.238	1.186
86595	5.167	5.101	86680	3.428	3.353	86830	1.238	1.186
86655	5.167	5.101	86740	3.429	3.354	86890	1.238	1.186
86715	5.167	5.102	86800	3.429	3.355	86950	1.238	1.186
86775	5.166	5.104	86860	3.428	3.355	87010	1.238	1.186
86835	5.167	5.104	86920	3.428	3.355	87070	1.238	1.186
86895	5.167	5.106	86980	3.428	3.356	87130	1.237	1.187
86955	5.168	5.107	87040	3.429	3.357	87190	1.237	1.186
87015	5.167	5.108	87100	3.429	3.357	87250	1.238	1.187
87075	5.167	5.108	87160	3.428	3.358	87310	1.238	1.187
87135	5.166	5.109	87220	3.428	3.358	87370	1.237	1.187
87195	5.166	5.11	87280	3.428	3.359	87430	1.238	1.187
87255	5.167	5.111	87340	3.429	3.359	87490	1.238	1.188
87315	5.167	5.112	87400	3.428	3.359	87550	1.238	1.188
87375	5.167	5.113	87460	3.428	3.36	87610	1.238	1.188
87435	5.166	5.114	87520	3.429	3.361	87670	1.238	1.188
87495	5.166	5.114	87580	3.427	3.361	87730	1.237	1.188
87555	5.166	5.116	87640	3.428	3.361	87790	1.237	1.188
87615	5.168	5.116	87700	3.429	3.363	87850	1.238	1.188
87675	5.168	5.116	87760	3.428	3.363	87910	1.238	1.189
87735	5.168	5.117	87820	3.428	3.363	87970	1.238	1.188
87795	5.169	5.118	87880	3.428	3.363	88030	1.237	1.189
87855	5.169	5.118	87940	3.428	3.364	88090	1.238	1.188
87915	5.17	5.119	88000	3.428	3.364	88150	1.238	1.189
87975	5.17	5.12	88060	3.428	3.365	88210	1.237	1.189
88035	5.17	5.121	88120	3.428	3.365	88270	1.237	1.189
88095	5.172	5.122	88180	3.428	3.365	88330	1.237	1.189
88155	5.171	5.122	88240	3.428	3.366	88390	1.238	1.189
88215	5.172	5.113	88300	3.428	3.367	88450	1.238	1.189
88275	5.171	4.977	88360	3.428	3.367	88510	1.237	1.185
88335	5.172	4.938	88420	3.428	3.367	88570	1.237	1.148
88395	5.171	4.948	88480	3.428	3.368	88630	1.237	1.15
88455	5.172	4.956	88540	3.428	3.369	88690	1.237	1.151
88515	5.172	4.963	88600	3.428	3.368	88750	1.237	1.151
88575	5.172	4.968	88660	3.428	3.369	88810	1.237	1.152
88635	5.173	4.974	88720	3.428	3.37	88870	1.237	1.153
88695	5.173	4.981	88780	3.429	3.37	88930	1.237	1.153
88755	5.174	4.984	88840	3.428	3.37	88990	1.237	1.153
88815	5.173	4.989	88900	3.428	3.371	89050	1.237	1.153
88875	5.172	4.994	88960	3.428	3.37	89110	1.237	1.153
88935	5.173	4.999	89020	3.429	3.372	89170	1.238	1.154
88995	5.172	5.003	89080	3.429	3.372	89230	1.238	1.154
89055	5.173	5.008	89140	3.428	3.373	89290	1.238	1.153
89115	5.172	5.011	89200	3.428	3.373	89350	1.238	1.155
89175	5.172	5.015	89260	3.428	3.373	89410	1.238	1.155
89235	5.172	5.02	89320	3.428	3.373	89470	1.237	1.155
89295	5.172	5.023	89380	3.429	3.373	89530	1.238	1.156
89355	5.172	5.026	89440	3.429	3.373	89590	1.238	1.156
89415	5.172	5.03	89500	3.428	3.374	89650	1.238	1.156
89475	5.172	5.034	89560	3.428	3.374	89710	1.237	1.156
89535	5.172	5.037	89620	3.428	3.374	89770	1.237	1.156
89595	5.172	5.04	89680	3.428	3.376	89830	1.238	1.156
89655	5.172	5.043	89740	3.428	3.376	89890	1.238	1.156
89715	5.172	5.047	89800	3.428	3.376	89950	1.238	1.157
89775	5.172	5.05	89860	3.428	3.376	90010	1.238	1.157
89835	5.171	5.053	89920	3.429	3.376	90070	1.238	1.157
89895	5.172	5.055	89980	3.428	3.377	90130	1.238	1.158
89955	5.171	5.058	90040	3.428	3.377	90190	1.238	1.158
90015	5.171	5.06	90100	3.428	3.377	90250	1.237	1.157
90075	5.172	5.063	90160	3.428	3.377	90310	1.238	1.158
90135	5.172	5.065	90220	3.428	3.378	90370	1.238	1.158
90195	5.172	5.068	90280	3.428	3.379	90430	1.238	1.159
90255	5.172	5.071	90340	3.428	3.379	90490	1.237	1.159
90315	5.171	5.073	90400	3.428	3.379	90550	1.237	1.159
90375	5.17	5.074	90460	3.428	3.379	90610	1.238	1.159
90435	5.171	5.076	90520	3.428	3.379	90670	1.237	1.159
90495	5.17	5.079	90580	3.428	3.379	90730	1.237	1.159
90555	5.17	5.081	90640	3.428	3.38	90790	1.237	1.16
90615	5.17	5.083	90700	3.428	3.38	90850	1.238	1.16
90675	5.169	5.085	90760	3.428	3.381	90910	1.238	1.16
90735	5.17	5.086	90820	3.428	3.381	90970	1.237	1.161
90795	5.17	5.088	90880	3.428	3.381	91030	1.238	1.16
90855	5.17	5.09	90940	3.428	3.382	91090	1.238	1.161
90915	5.17	5.092	91000	3.428	3.382	91150	1.238	1.161
90975	5.171	5.093	91060	3.428	3.382	91210	1.238	1.162
91035	5.17	5.095	91120	3.428	3.382	91270	1.238	1.162
91095	5.17	5.096	91180	3.428	3.382	91330	1.238	1.162
91155	5.169	5.098	91240	3.428	3.382	91390	1.238	1.162
91215	5.17	5.098	91300	3.428	3.383	91450	1.238	1.162
91275	5.17	5.1	91360	3.428	3.383	91510	1.238	1.162
91335	5.17	5.101	91420	3.428	3.383	91570	1.238	1.162
91395	5.169	5.103	91480	3.428	3.383	91630	1.238	1.162
91455	5.17	5.104	91540	3.428	3.384	91690	1.238	1.162
91515	5.169	5.105	91600	3.428	3.384	91750	1.238	1.162
91575	5.17	5.106	91660	3.428	3.385	91810	1.238	1.164
91635	5.17	5.107	91720	3.428	3.385	91870	1.238	1.164
91695	5.17	5.109	91780	3.428	3.385	91930	1.238	1.164
91755	5.17	5.11	91840	3.428	3.385	91990	1.238	1.164
91815	5.17	5.111	91900	3.429	3.385	92050	1.238	1.165
91875	5.17	5.112	91960	3.428	3.385	92110	1.238	1.165
91935	5.17	5.111	92020	3.428	3.386	92170	1.238	1.165
91995	5.169	5.095	92080	3.428	3.386	92230	1.238	1.165
92055	5.168	4.903	92140	3.428	3.386	92290	1.238	1.165
92115	5.169	4.921	92200	3.428	3.387	92350	1.237	1.165
92175	5.169	4.933	92260	3.428	3.387	92410	1.238	1.165
92235	5.169	4.942	92320	3.428	3.387	92470	1.238	1.165
92295	5.168	4.948	92380	3.428	3.387	92530	1.237	1.165
92355	5.168	4.954	92440	3.428	3.387	92590	1.238	1.166
92415	5.167	4.96	92500	3.428	3.388	92650	1.238	1.166
92475	5.168	4.966	92560	3.428	3.388	92710	1.238	1.166
92535	5.168	4.972	92620	3.428	3.388	92770	1.238	1.167
92595	5.167	4.977	92680	3.427	3.388	92830	1.238	1.167
92655	5.168	4.982	92740	3.428	3.388	92890	1.238	1.167
92715	5.168	4.986	92800	3.428	3.388	92950	1.238	1.167
92775	5.167	4.991	92860	3.428	3.388	93010	1.237	1.167
92835	5.166	4.996	92920	3.428	3.389	93070	1.238	1.167
92895	5.166	5	92980	3.427	3.389	93130	1.238	1.167
92955	5.167	5.005	93040	3.427	3.389	93190	1.238	1.168
93015	5.166	5.008	93100	3.428	3.39	93250	1.238	1.168
93075	5.166	5.012	93160	3.428	3.39	93310	1.238	1.168
93135	5.166	5.016	93220	3.428	3.39	93370	1.238	1.168
93195	5.166	5.02	93280	3.428	3.39	93430	1.238	1.169
93255	5.166	5.023	93340	3.427	3.391	93490	1.238	1.169
93315	5.166	5.027	93400	3.428	3.39	93550	1.238	1.169
93375	5.166	5.031	93460	3.427	3.391	93610	1.238	1.17
93435	5.166	5.034	93520	3.428	3.391	93670	1.238	1.17
93495	5.166	5.037	93580	3.428	3.391	93730	1.238	1.169
93555	5.166	5.041	93640	3.428	3.391	93790	1.238	1.169
93615	5.166	5.043	93700	3.428	3.391	93850	1.238	1.17
93675	5.166	5.046	93760	3.428	3.392	93910	1.238	1.17
93735	5.166	5.05	93820	3.428	3.392	93970	1.238	1.17
93795	5.166	5.052	93880	3.427	3.392	94030	1.238	1.17
93855	5.166	5.055	93940	3.427	3.392	94090	1.238	1.171
93915	5.166	5.057	94000	3.428	3.392	94150	1.238	1.171
93975	5.166	5.059	94060	3.428	3.392	94210	1.238	1.171
94035	5.165	5.062	94120	3.428	3.393	94270	1.238	1.171
94095	5.165	5.064	94180	3.428	3.393	94390	1.238	1.171
94155	5.166	5.067	94240	3.427	3.393	94450	1.237	1.172
94215	5.166	5.069	94300	3.427	3.394	94510	1.238	1.171
94275	5.165	5.071	94360	3.427	3.394	94570	1.238	1.172
94335	5.166	5.073	94420	3.427	3.394	94630	1.238	1.172
94395	5.166	5.075	94480	3.427	3.394	94690	1.238	1.173
94455	5.166	5.077	94540	3.428	3.394	94750	1.238	1.173
94515	5.168	5.079	94600	3.427	3.394	94810	1.24	1.174
94575	5.168	5.081	94660	3.427	3.394	94870	1.238	1.173
94635	5.168	5.082	94720	3.428	3.394	94930	1.238	1.173
94695	5.168	5.084	94780	3.427	3.395	94990	1.238	1.174
94755	5.169	5.086	94840	3.427	3.395	95050	1.238	1.174
94815	5.169	5.088	94900	3.428	3.395	95110	1.237	1.174
94875	5.169	5.089	94960	3.427	3.395	95170	1.237	1.174
94935	5.17	5.091	95020	3.427	3.396	95230	1.237	1.174
94995	5.17	5.093	95080	3.427	3.395	95290	1.238	1.174
95055	5.17	5.094	95140	3.427	3.395	95350	1.237	1.174
95115	5.17	5.095	95200	3.427	3.396	95410	1.238	1.175
95175	5.171	5.098	95260	3.427	3.396	95470	1.238	1.175
95235	5.171	5.099	95320	3.427	3.396	95530	1.238	1.175
95295	5.17	5.1	95380	3.427	3.396	95590	1.238	1.175
95355	5.17	5.101	95440	3.427	3.396	95650	1.238	1.175
95415	5.17	5.102	95500	3.427	3.397	95710	1.238	1.176
95475	5.17	5.104	95560	3.427	3.397	95770	1.237	1.176
95535	5.17	5.104	95620	3.427	3.397	95830	1.238	1.176
95595	5.17	5.106	95680	3.427	3.397	95890	1.238	1.176
95655	5.17	5.107	95740	3.427	3.397	95950	1.238	1.176
95715	5.171	5.109	95800	3.427	3.397	96010	1.238	1.177
95775	5.17	5.11	95860	3.428	3.397	96070	1.238	1.176
95835	5.17	5.111	95920	3.427	3.397	96130	1.237	1.177
95895	5.172	5.112	95980	3.427	3.397	96190	1.238	1.177
95955	5.17	5.113	96040	3.427	3.397	96250	1.238	1.177
96015	5.17	5.113	96100	3.427	3.398	96310	1.238	1.177
96075	5.17	5.114	96160	3.427	3.398	96370	1.237	1.178
96135	5.171	5.115	96220	3.427	3.399	96430	1.238	1.178
96195	5.17	5.116	96280	3.427	3.399	96490	1.238	1.178
96255	5.17	5.116	96340	3.427	3.399	96550	1.238	1.178
96315	5.17	5.118	96400	3.427	3.399	96610	1.238	1.178
96375	5.17	5.118	96460	3.427	3.399	96670	1.238	1.179
96435	5.17	5.119	96520	3.427	3.399	96730	1.238	1.178
96495	5.17	5.12	96580	3.427	3.399	96790	1.238	1.179
96555	5.17	5.12	96640	3.427	3.399	96850	1.238	1.18
96615	5.17	5.121	96700	3.427	3.399	96910	1.238	1.18
96675	5.17	5.121	96760	3.427	3.4	96970	1.238	1.18
96735	5.17	5.115	96820	3.427	3.4	97030	1.238	1.179
96795	5.17	5.075	96880	3.427	3.399	97090	1.238	1.18
96855	5.169	4.942	96940	3.427	3.4	97150	1.237	1.18
96915	5.169	4.952	97000	3.427	3.4	97210	1.238	1.18
96975	5.169	4.96	97060	3.427	3.4	97270	1.238	1.18
97035	5.17	4.966	97120	3.427	3.4	97330	1.238	1.18
97095	5.169	4.972	97180	3.427	3.4	97390	1.238	1.18
97155	5.169	4.978	97240	3.427	3.4	97450	1.238	1.18
97215	5.169	4.983	97300	3.427	3.4	97510	1.238	1.18
97275	5.169	4.987	97360	3.427	3.4	97570	1.238	1.18
97335	5.169	4.993	97420	3.427	3.4	97630	1.238	1.181
97395	5.169	4.997	97480	3.427	3.4	97690	1.238	1.181
97455	5.169	5.002	97540	3.427	3.4	97750	1.239	1.182
97515	5.169	5.006	97600	3.427	3.4	97810	1.238	1.182
97575	5.169	5.011	97660	3.427	3.401	97870	1.238	1.182
97635	5.168	5.014	97720	3.427	3.4	97930	1.238	1.182
97695	5.169	5.019	97780	3.427	3.4	97990	1.238	1.182
97755	5.169	5.023	97840	3.427	3.398	98050	1.238	1.182
97815	5.168	5.026	97900	3.427	3.388	98110	1.237	1.183
97875	5.168	5.03	97960	3.427	3.3	98170	1.238	1.183
97935	5.169	5.033	98020	3.427	3.31	98230	1.238	1.183
97995	5.168	5.037	98080	3.426	3.316	98290	1.238	1.183
98055	5.169	5.04	98140	3.427	3.32	98350	1.238	1.183
98115	5.168	5.044	98200	3.427	3.323	98410	1.238	1.183
98175	5.168	5.047	98260	3.427	3.325	98470	1.239	1.183
98235	5.168	5.05	98320	3.427	3.325	98530	1.238	1.183
98295	5.168	5.052	98380	3.427	3.327	98590	1.238	1.183
98355	5.168	5.055	98440	3.427	3.328	98650	1.238	1.183
98415	5.168	5.058	98500	3.427	3.329	98710	1.238	1.184
98475	5.168	5.061	98560	3.427	3.329	98770	1.238	1.184
98535	5.166	5.063	98620	3.427	3.331	98830	1.238	1.184
98595	5.167	5.065	98680	3.427	3.332	98890	1.238	1.184
98655	5.168	5.068	98740	3.427	3.333	98950	1.238	1.184
98715	5.168	5.07	98800	3.427	3.333	99010	1.238	1.184
98775	5.168	5.072	98860	3.427	3.334	99070	1.238	1.185
98835	5.168	5.075	98920	3.427	3.334	99130	1.238	1.185
98895	5.168	5.077	98980	3.427	3.335	99190	1.238	1.185
98955	5.168	5.079	99040	3.427	3.337	99250	1.238	1.185
99015	5.167	5.081	99100	3.428	3.337	99310	1.238	1.185
99075	5.167	5.083	99160	3.427	3.337	99370	1.238	1.186
99135	5.167	5.085	99220	3.427	3.338	99430	1.237	1.185
99195	5.167	5.086	99280	3.427	3.339	99490	1.238	1.186
99255	5.167	5.089	99340	3.427	3.34	99550	1.238	1.186
99315	5.167	5.09	99400	3.427	3.34	99610	1.237	1.186
99375	5.167	5.092	99460	3.428	3.341	99670	1.238	1.186
99435	5.167	5.093	99520	3.427	3.342	99730	1.238	1.186
99495	5.167	5.094	99580	3.427	3.343	99790	1.237	1.186
99555	5.167	5.096	99640	3.427	3.343	99850	1.238	1.186
99615	5.168	5.098	99700	3.428	3.343	99910	1.238	1.187
99675	5.168	5.098	99760	3.427	3.343	99970	1.238	1.187
99735	5.166	5.1	99820	3.428	3.345	100030	1.238	1.187
99795	5.167	5.101	99880	3.428	3.346	100090	1.238	1.187
99855	5.168	5.102	99940	3.427	3.346	100150	1.238	1.187
99915	5.166	5.104	100000	3.427	3.346	100210	1.238	1.187
99975	5.167	5.105	100060	3.428	3.347	100270	1.238	1.187
100035	5.166	5.107	100120	3.428	3.348	100330	1.238	1.188
100095	5.166	5.107	100180	3.428	3.348	100390	1.238	1.187
100155	5.166	5.108	100240	3.428	3.349	100450	1.238	1.188
100215	5.167	5.109	100300	3.428	3.349	100510	1.237	1.188
100275	5.167	5.11	100360	3.428	3.35	100570	1.238	1.188
100335	5.167	5.111	100420	3.428	3.351	100630	1.238	1.188
100395	5.167	5.112	100480	3.427	3.351	100690	1.238	1.188
100455	5.167	5.113	100540	3.428	3.352	100750	1.238	1.189
100515	5.167	5.114	100600	3.427	3.352	100810	1.238	1.189
100575	5.167	5.115	100660	3.428	3.353	100870	1.237	1.189
100635	5.166	5.116	100720	3.428	3.354	100930	1.238	1.189
100695	5.167	5.116	100780	3.428	3.354	100990	1.238	1.189
100755	5.167	5.117	100840	3.427	3.355	101050	1.238	1.189
100815	5.166	5.118	100900	3.428	3.355	101110	1.238	1.189
100875	5.168	5.118	100960	3.428	3.355	101170	1.238	1.189
100935	5.166	5.119	101020	3.428	3.356	101230	1.238	1.189
100995	5.166	5.12	101080	3.427	3.357	101290	1.238	1.189
101055	5.168	5.121	101140	3.428	3.357	101350	1.238	1.19
101115	5.167	5.122	101200	3.428	3.358	101410	1.237	1.19
101175	5.167	5.122	101260	3.428	3.358	101470	1.238	1.19
101235	5.166	5.122	101320	3.428	3.359	101530	1.238	1.191
101295	5.168	5.123	101380	3.428	3.359	101590	1.238	1.191
101355	5.166	5.125	101440	3.428	3.36	101650	1.237	1.191
101415	5.166	5.125	101500	3.428	3.36	101710	1.238	1.191
101475	5.167	5.125	101560	3.428	3.361	101770	1.238	1.191
101535	5.167	5.125	101620	3.428	3.361	101830	1.238	1.191
101595	5.168	5.126	101680	3.428	3.361	101890	1.237	1.192
101655	5.167	5.127	101740	3.428	3.361	101950	1.238	1.191
101715	5.167	5.127	101800	3.428	3.363	102010	1.237	1.192
101775	5.168	5.128	101860	3.428	3.363	102070	1.238	1.192
101835	5.167	5.128	101920	3.428	3.363	102130	1.238	1.192
101895	5.167	5.128	101980	3.428	3.364	102190	1.238	1.192
101955	5.167	5.129	102040	3.428	3.364	102250	1.238	1.192
102015	5.167	5.129	102100	3.428	3.365	102310	1.237	1.192
102075	5.168	5.129	102160	3.428	3.365	102370	1.238	1.192
102135	5.166	5.13	102220	3.428	3.365	102430	1.238	1.192
102195	5.167	5.13	102280	3.427	3.366	102490	1.237	1.192
102255	5.166	5.131	102340	3.428	3.366	102550	1.238	1.192
102315	5.168	5.131	102400	3.428	3.367	102610	1.237	1.192
102375	5.168	5.131	102460	3.428	3.367	102670	1.237	1.193
102435	5.166	5.132	102520	3.428	3.367	102730	1.238	1.192
102495	5.167	5.132	102580	3.428	3.368	102790	1.238	1.193
102555	5.167	5.132	102640	3.428	3.368	102850	1.238	1.193
102615	5.167	5.133	102700	3.428	3.369	102910	1.238	1.193
102675	5.166	5.133	102760	3.428	3.369	102970	1.238	1.193
102735	5.167	5.133	102820	3.428	3.37	103030	1.238	1.193
102795	5.167	5.134	102880	3.428	3.37	103090	1.238	1.193
102855	5.167	5.134	102940	3.428	3.37	103150	1.238	1.193
102915	5.166	5.134	103000	3.428	3.37	103210	1.238	1.194
102975	5.166	5.134	103060	3.428	3.37	103270	1.238	1.193
103035	5.168	5.134	103120	3.428	3.371	103330	1.237	1.194
103095	5.166	5.134	103180	3.427	3.372	103390	1.238	1.194
103155	5.167	5.135	103240	3.428	3.373	103450	1.238	1.194
103215	5.167	5.136	103300	3.428	3.373	103510	1.238	1.194
103275	5.168	5.135	103360	3.428	3.373	103570	1.238	1.195
103335	5.168	5.136	103420	3.428	3.373	103630	1.237	1.195
103395	5.168	5.136	103480	3.428	3.373	103690	1.238	1.195
103455	5.168	5.136	103540	3.428	3.373	103750	1.238	1.195
103515	5.167	5.136	103600	3.428	3.374	103810	1.238	1.195
103575	5.167	5.137	103660	3.428	3.374	103870	1.238	1.195
103635	5.167	5.136	103720	3.428	3.375	103930	1.238	1.195
103695	5.167	5.137	103780	3.428	3.375	103990	1.238	1.195
103755	5.168	5.137	103840	3.427	3.375	104050	1.238	1.195
103815	5.167	5.137	103900	3.428	3.376	104110	1.238	1.195
103875	5.168	5.137	103960	3.428	3.376	104170	1.238	1.195
103935	5.168	5.137	104020	3.428	3.376	104230	1.238	1.196
103995	5.168	5.137	104080	3.428	3.376	104290	1.238	1.196
104055	5.168	5.137	104140	3.428	3.376	104350	1.238	1.196
104115	5.167	5.138	104200	3.428	3.378	104410	1.237	1.196
104175	5.168	5.138	104260	3.428	3.378	104470	1.238	1.196
104235	5.168	5.138	104320	3.428	3.378	104530	1.237	1.196
104295	5.168	5.138	104380	3.428	3.378	104590	1.238	1.196
104355	5.168	5.138	104440	3.428	3.379	104650	1.238	1.196
104415	5.168	5.139	104500	3.428	3.379	104710	1.238	1.197
104475	5.168	5.139	104560	3.428	3.379	104770	1.238	1.197
104535	5.168	5.139	104620	3.428	3.379	104830	1.238	1.197
104595	5.168	5.139	104740	3.428	3.38	104890	1.238	1.197
104655	5.169	5.139	104800	3.428	3.38	104950	1.238	1.197
104715	5.168	5.139	104860	3.428	3.38	105010	1.237	1.197
104775	5.168	5.139	104920	3.429	3.381	105070	1.238	1.197
104835	5.168	5.139	104980	3.428	3.381	105130	1.238	1.197
104895	5.168	5.139	105040	3.427	3.381	105190	1.237	1.197
104955	5.169	5.139	105100	3.427	3.382	105250	1.238	1.197
105015	5.168	5.139	105160	3.428	3.382	105310	1.238	1.197
105075	5.168	5.14	105220	3.428	3.382	105370	1.238	1.198
105135	5.168	5.14	105280	3.428	3.382	105430	1.238	1.198
105195	5.168	5.14	105340	3.428	3.382	105490	1.237	1.198
105255	5.168	5.14	105400	3.428	3.382	105550	1.238	1.198
105315	5.169	5.14	105460	3.428	3.383	105610	1.238	1.198
105375	5.168	5.14	105520	3.427	3.383	105670	1.238	1.198
105435	5.168	5.14	105580	3.428	3.384	105730	1.238	1.198
105495	5.168	5.14	105640	3.428	3.384	105790	1.238	1.198
105555	5.168	5.14	105700	3.428	3.384	105850	1.238	1.198
105615	5.168	5.14	105760	3.428	3.384	105910	1.238	1.198
105675	5.169	5.14	105820	3.428	3.385	105970	1.238	1.198
105735	5.168	5.14	105880	3.428	3.384	106030	1.238	1.199
105795	5.168	5.14	105940	3.428	3.385	106090	1.237	1.199
105855	5.168	5.14	106000	3.428	3.385	106150	1.237	1.199
105915	5.168	5.14	106060	3.428	3.386	106210	1.238	1.199
105975	5.168	5.141	106120	3.428	3.386	106270	1.237	1.199
106035	5.168	5.14	106180	3.428	3.386	106330	1.237	1.2
106095	5.168	5.14	106240	3.428	3.386	106390	1.237	1.2
106155	5.169	5.141	106300	3.427	3.387	106450	1.237	1.2
106215	5.169	5.141	106360	3.428	3.387	106510	1.237	1.2
106275	5.168	5.14	106420	3.428	3.387	106570	1.237	1.2
106335	5.168	5.141	106480	3.427	3.387	106630	1.238	1.2
106395	5.168	5.14	106540	3.428	3.388	106690	1.237	1.2
106455	5.169	5.14	106600	3.427	3.388	106750	1.238	1.2
106515	5.168	5.141	106660	3.427	3.388	106810	1.238	1.2
106575	5.169	5.141	106720	3.428	3.388	106870	1.237	1.201
106635	5.169	5.141	106780	3.428	3.388	106930	1.237	1.201
106695	5.168	5.14	106840	3.428	3.388	106990	1.238	1.2
106755	5.169	5.142	106900	3.428	3.388	107050	1.237	1.201
106815	5.169	5.141	106960	3.427	3.389	107110	1.238	1.201
106875	5.169	5.141	107020	3.428	3.388	107170	1.238	1.201
106935	5.169	5.142	107080	3.428	3.389	107230	1.237	1.201
106995	5.169	5.141	107140	3.428	3.389	107290	1.237	1.201
107055	5.169	5.142	107200	3.428	3.39	107350	1.237	1.201
107115	5.169	5.141	107260	3.427	3.39	107410	1.237	1.201
107175	5.169	5.141	107320	3.428	3.39	107470	1.237	1.201
107235	5.169	5.141	107380	3.428	3.391	107530	1.238	1.201
107295	5.169	5.141	107440	3.427	3.39	107590	1.238	1.201
107355	5.169	5.141	107500	3.427	3.391	107650	1.237	1.201
107415	5.169	5.141	107560	3.428	3.391	107710	1.237	1.201
107475	5.169	5.141	107620	3.427	3.391	107770	1.238	1.201
107535	5.169	5.142	107680	3.428	3.391	107830	1.238	1.202
107595	5.169	5.142	107740	3.427	3.391	107890	1.238	1.201
107655	5.169	5.142	107800	3.427	3.391	107950	1.237	1.201
107715	5.169	5.142	107860	3.427	3.392	108010	1.237	1.202
107775	5.169	5.142	107920	3.428	3.391	108070	1.238	1.202
107835	5.168	5.141	107980	3.428	3.392	108130	1.237	1.202
107895	5.169	5.141	108040	3.427	3.392	108190	1.238	1.202
107955	5.169	5.141	108100	3.428	3.392	108250	1.237	1.202
108015	5.168	5.13	108160	3.427	3.392	108310	1.237	1.202
108075	5.168	4.898	108220	3.427	3.392	108370	1.237	1.202
108135	5.168	4.914	108280	3.427	3.393	108430	1.237	1.202
108195	5.168	4.924	108340	3.427	3.393	108490	1.238	1.203
108255	5.168	4.933	108400	3.428	3.393	108550	1.238	1.203
108315	5.168	4.94	108460	3.427	3.393	108610	1.237	1.203
108375	5.168	4.947	108520	3.427	3.393	108670	1.237	1.203
108435	5.168	4.953	108580	3.428	3.394	108730	1.237	1.203
108495	5.167	4.959	108640	3.428	3.394	108790	1.237	1.203
108555	5.168	4.964	108700	3.427	3.394	108850	1.237	1.203
108615	5.168	4.97	108760	3.427	3.393	108910	1.238	1.204
108675	5.168	4.975	108820	3.428	3.394	108970	1.237	1.204
108735	5.167	4.98	108880	3.427	3.394	109030	1.237	1.204
108795	5.166	4.985	108940	3.428	3.394	109090	1.238	1.204
108855	5.166	4.989	109000	3.428	3.394	109150	1.238	1.204
108915	5.166	4.994	109060	3.427	3.395	109210	1.238	1.204
108975	5.166	4.999	109120	3.427	3.395	109270	1.237	1.204
109035	5.166	5.003	109180	3.428	3.395	109330	1.238	1.204
109095	5.166	5.008	109240	3.428	3.395	109390	1.237	1.204
109155	5.166	5.011	109300	3.427	3.395	109450	1.238	1.204
109215	5.166	5.015	109360	3.428	3.396	109510	1.237	1.204
109275	5.166	5.019	109420	3.427	3.396	109570	1.238	1.204
109335	5.166	5.023	109480	3.427	3.396	109630	1.237	1.204
109395	5.166	5.026	109540	3.428	3.396	109690	1.237	1.204
109455	5.167	5.03	109600	3.427	3.396	109750	1.237	1.205
109515	5.167	5.033	109660	3.427	3.396	109810	1.238	1.205
109575	5.166	5.037	109720	3.427	3.396	109870	1.238	1.205
109635	5.166	5.04	109780	3.427	3.396	109930	1.237	1.205
109695	5.166	5.043	109840	3.427	3.397	109990	1.238	1.205
109755	5.166	5.046	109900	3.427	3.397	110050	1.237	1.205
109815	5.166	5.049	109960	3.427	3.397	110110	1.238	1.205
109875	5.166	5.051	110020	3.427	3.397	110170	1.238	1.205
109935	5.166	5.054	110080	3.428	3.397	110230	1.238	1.205
109995	5.166	5.057	110140	3.427	3.397	110290	1.238	1.206
110055	5.166	5.059	110200	3.428	3.397	110350	1.238	1.206
110115	5.166	5.062	110260	3.428	3.397	110410	1.238	1.206
110175	5.166	5.064	110320	3.427	3.397	110470	1.238	1.206
110235	5.166	5.067	110380	3.427	3.397	110530	1.238	1.206
110295	5.166	5.068	110440	3.428	3.397	110590	1.237	1.206
110355	5.165	5.071	110500	3.427	3.398	110650	1.237	1.206
110415	5.166	5.072	110560	3.428	3.398	110710	1.238	1.207
110475	5.166	5.075	110620	3.428	3.399	110770	1.238	1.207
110535	5.166	5.077	110680	3.427	3.397	110830	1.237	1.206
110595	5.166	5.08	110740	3.427	3.398	110890	1.238	1.206
110655	5.166	5.081	110800	3.427	3.399	110950	1.238	1.207
110715	5.165	5.083	110860	3.427	3.399	111010	1.238	1.207
110775	5.166	5.084	110920	3.428	3.399	111070	1.237	1.207
110835	5.166	5.086	110980	3.428	3.399	111130	1.237	1.207
110895	5.166	5.088	111040	3.427	3.399	111190	1.238	1.207
110955	5.165	5.089	111100	3.427	3.4	111250	1.237	1.207
111015	5.165	5.091	111160	3.428	3.4	111310	1.238	1.207
111075	5.165	5.092	111220	3.427	3.399	111370	1.238	1.207
111135	5.166	5.094	111280	3.428	3.4	111430	1.237	1.207
111195	5.166	5.095	111340	3.427	3.4	111490	1.237	1.207
111255	5.166	5.096	111400	3.427	3.4	111550	1.237	1.207
111315	5.166	5.098	111460	3.427	3.4	111610	1.238	1.207
111375	5.165	5.099	111520	3.427	3.4	111670	1.237	1.207
111435	5.166	5.1	111580	3.427	3.4	111730	1.237	1.207
111495	5.166	5.102	111640	3.427	3.4	111790	1.237	1.207
111555	5.166	5.103	111700	3.427	3.4	111850	1.237	1.207
111615	5.166	5.104	111760	3.427	3.4	111910	1.237	1.207
111675	5.166	5.105	111820	3.427	3.4	111970	1.238	1.207
111735	5.166	5.107	111880	3.428	3.4	112030	1.238	1.207
111795	5.165	5.107	111940	3.427	3.4	112090	1.238	1.207
111855	5.166	5.108	112000	3.427	3.4	112150	1.237	1.207
111915	5.165	5.109	112060	3.427	3.4	112210	1.238	1.208
111975	5.166	5.11	112120	3.428	3.4	112270	1.237	1.207
112035	5.166	5.111	112180	3.427	3.401	112330	1.238	1.207
112095	5.166	5.112	112240	3.427	3.401	112390	1.237	1.208
112155	5.165	5.113	112300	3.428	3.401	112450	1.237	1.208
112215	5.165	5.113	112360	3.427	3.401	112510	1.238	1.208
112275	5.165	5.114	112420	3.427	3.401	112570	1.237	1.208
112335	5.166	5.115	112480	3.427	3.401	112630	1.237	1.208
112395	5.166	5.116	112540	3.427	3.401	112690	1.238	1.209
112455	5.165	5.116	112600	3.428	3.401	112750	1.237	1.209
112515	5.166	5.117	112660	3.427	3.401	112810	1.237	1.209
112575	5.166	5.118	112720	3.427	3.401	112870	1.237	1.209
112635	5.165	5.118	112780	3.427	3.402	112930	1.238	1.209
112695	5.165	5.119	112840	3.427	3.401	112990	1.238	1.209
112755	5.165	5.12	112900	3.427	3.402	113050	1.237	1.209
112815	5.165	5.12	112960	3.428	3.402	113110	1.237	1.209
112875	5.166	5.121	113020	3.428	3.402	113170	1.237	1.209
112935	5.166	5.121	113080	3.427	3.402	113230	1.237	1.209
112995	5.166	5.122	113140	3.427	3.402	113290	1.238	1.21
113055	5.166	5.122	113200	3.427	3.402	113350	1.237	1.21
113115	5.166	5.122	113260	3.428	3.403	113410	1.237	1.21
113175	5.166	5.123	113320	3.428	3.402	113470	1.237	1.209
113235	5.165	5.123	113380	3.428	3.402	113530	1.238	1.21
113295	5.166	5.124	113440	3.428	3.403	113590	1.237	1.21
113355	5.165	5.125	113500	3.427	3.402	113650	1.238	1.21
113415	5.165	5.125	113560	3.427	3.403	113710	1.237	1.21
113475	5.166	5.125	113620	3.427	3.402	113770	1.237	1.21
113535	5.165	5.126	113680	3.427	3.403	113830	1.237	1.21
113595	5.166	5.127	113740	3.427	3.403	113890	1.238	1.21
113655	5.166	5.127	113800	3.428	3.403	113950	1.237	1.21
113715	5.165	5.127	113860	3.428	3.403	114010	1.237	1.21
113775	5.166	5.127	113920	3.427	3.403	114070	1.237	1.21
113835	5.166	5.128	113980	3.427	3.403	114130	1.237	1.21
113895	5.166	5.128	114040	3.428	3.403	114190	1.237	1.21
113955	5.165	5.128	114100	3.428	3.403	114250	1.238	1.21
114015	5.165	5.128	114160	3.427	3.403	114310	1.237	1.21
114075	5.165	5.129	114220	3.427	3.403	114370	1.237	1.21
114135	5.166	5.129	114280	3.427	3.403	114430	1.237	1.21
114195	5.166	5.13	114340	3.427	3.403	114490	1.237	1.21
114255	5.166	5.13	114400	3.427	3.403	114550	1.237	1.21
114315	5.166	5.13	114460	3.427	3.403	114610	1.237	1.211
114375	5.166	5.131	114520	3.427	3.403	114670	1.237	1.21
114435	5.166	5.131	114580	3.427	3.403	114730	1.237	1.211
114495	5.165	5.131	114640	3.427	3.404	114790	1.237	1.211
114555	5.166	5.131	114700	3.427	3.403	114850	1.238	1.211
114615	5.165	5.117	114760	3.427	3.404	114910	1.237	1.211
114675	5.165	4.909	114820	3.427	3.404	114970	1.237	1.211
114735	5.165	4.921	114880	3.427	3.404	115030	1.238	1.211
114795	5.165	4.932	114940	3.428	3.404	115090	1.238	1.211
114855	5.164	4.939	115000	3.427	3.404	115150	1.238	1.211
114915	5.165	4.945	115060	3.427	3.404	115210	1.237	1.211
114975	5.165	4.952	115120	3.427	3.404	115270	1.237	1.211
115035	5.164	4.957	115180	3.427	3.404	115330	1.238	1.211
115095	5.164	4.963	115240	3.427	3.404	115390	1.237	1.211
115155	5.164	4.969	115300	3.427	3.403	115450	1.237	1.211
115215	5.164	4.974	115360	3.427	3.404	115510	1.237	1.212
115275	5.164	4.978	115420	3.427	3.404	115570	1.238	1.212
115335	5.163	4.983	115480	3.427	3.404	115630	1.238	1.212
115395	5.164	4.988	115540	3.427	3.404	115690	1.237	1.211
115455	5.163	4.993	115600	3.427	3.405	115750	1.237	1.212
115515	5.164	4.997	115660	3.427	3.405	115810	1.237	1.212
115575	5.163	5.001	115720	3.427	3.405	115870	1.237	1.212
115635	5.164	5.005	115780	3.427	3.406	115930	1.237	1.212
115695	5.163	5.009	115840	3.427	3.404	115990	1.237	1.212
115755	5.163	5.014	115900	3.427	3.405	116050	1.237	1.213
115815	5.163	5.017	115960	3.427	3.405	116110	1.237	1.212
115875	5.163	5.02	116020	3.427	3.405	116170	1.237	1.213
115935	5.164	5.023	116080	3.427	3.405	116230	1.237	1.212
115995	5.163	5.027	116140	3.427	3.405	116290	1.237	1.213
116055	5.164	5.031	116200	3.427	3.405	116350	1.237	1.213
116115	5.163	5.034	116260	3.427	3.405	116410	1.237	1.212
116175	5.163	5.037	116320	3.427	3.406	116470	1.237	1.212
116235	5.163	5.041	116380	3.427	3.405	116530	1.237	1.212
116295	5.163	5.042	116440	3.427	3.405	116590	1.238	1.213
116355	5.163	5.046	116500	3.427	3.405	116650	1.238	1.213
116415	5.163	5.048	116560	3.427	3.405	116710	1.237	1.213
116475	5.162	5.051	116620	3.427	3.405	116770	1.238	1.213
116535	5.163	5.053	116680	3.427	3.405	116830	1.237	1.213
116595	5.163	5.056	116740	3.427	3.406	116890	1.237	1.213
116655	5.163	5.059	116800	3.427	3.406	116950	1.237	1.213
116715	5.162	5.06	116860	3.427	3.406	117010	1.237	1.213
116775	5.163	5.064	116920	3.427	3.405	117070	1.237	1.213
116835	5.163	5.066	116980	3.427	3.406	117130	1.237	1.213
116895	5.163	5.068	117040	3.427	3.406	117190	1.237	1.213
116955	5.163	5.07	117100	3.427	3.406	117250	1.237	1.214
117015	5.162	5.072	117160	3.427	3.406	117310	1.237	1.213
117075	5.163	5.074	117220	3.427	3.406	117370	1.237	1.213
117135	5.163	5.076	117280	3.427	3.406	117430	1.238	1.213
117195	5.162	5.078	117340	3.427	3.406	117490	1.238	1.213
117255	5.162	5.079	117400	3.427	3.406	117550	1.237	1.214
117315	5.162	5.08	117460	3.427	3.406	117610	1.237	1.214
117375	5.162	5.082	117520	3.427	3.406	117670	1.237	1.214
117435	5.162	5.084	117580	3.428	3.406	117730	1.237	1.214
117495	5.162	5.086	117640	3.427	3.406	117790	1.237	1.214
117555	5.162	5.087	117700	3.427	3.406	117850	1.237	1.214
117615	5.163	5.089	117760	3.427	3.406	117910	1.237	1.214
117675	5.162	5.089	117820	3.427	3.406	117970	1.237	1.214
117735	5.162	5.091	117880	3.427	3.406	118030	1.237	1.214
117795	5.162	5.092	117940	3.427	3.406	118090	1.237	1.214
117855	5.162	5.094	118000	3.427	3.406	118150	1.237	1.214
117915	5.162	5.095	118060	3.427	3.406	118210	1.237	1.215
117975	5.162	5.096	118120	3.427	3.406	118270	1.237	1.215
118035	5.161	5.098	118180	3.427	3.406	118330	1.237	1.215
118095	5.162	5.099	118240	3.427	3.406	118390	1.237	1.215
118155	5.162	5.099	118300	3.427	3.406	118450	1.237	1.215
118215	5.162	5.101	118360	3.427	3.406	118510	1.237	1.214
118275	5.161	5.102	118420	3.427	3.406	118570	1.237	1.215
118335	5.162	5.103	118480	3.427	3.406	118630	1.238	1.215
118395	5.161	5.104	118540	3.427	3.406	118690	1.237	1.215
118455	5.162	5.104	118600	3.427	3.406	118750	1.237	1.214
118515	5.161	5.105	118660	3.427	3.406	118810	1.237	1.215
118575	5.162	5.106	118720	3.427	3.406	118870	1.237	1.215
118635	5.162	5.107	118780	3.427	3.406	118930	1.237	1.215
118695	5.163	5.108	118840	3.427	3.406	118990	1.237	1.215
118755	5.162	5.109	118900	3.427	3.406	119050	1.237	1.215
118815	5.163	5.11	118960	3.427	3.406	119110	1.237	1.215
118875	5.164	5.11	119020	3.427	3.406	119170	1.237	1.216
118935	5.165	5.111	119080	3.427	3.406	119230	1.237	1.216
118995	5.165	5.112	119140	3.427	3.406	119290	1.237	1.216
[truncated: 4,729 more rows]

## Sheet: 4(b)
Time	Strain (5MPa)	Time	Strain (3MPa)	Time	Strain (1MPa)
10	0	69	10	0	0
14	0	99	18	60	10
44	0	129	18	120	27
74	0	159	40	180	57
104	0	189	87	240	74
134	100	219	102	300	87
164	175	249	113	360	99
194	222	279	123	420	108
224	264	309	132	480	114
254	303	339	141	540	119
284	340	369	157	600	122
314	370	399	171	660	125
344	397	429	183	720	127
374	417	459	194	780	128
404	436	489	203	840	128
434	444	519	183	900	130
464	462	549	225	960	132
494	472	579	238	1020	109
524	477	609	246	1080	125
554	483	639	253	1140	89
584	487	669	256	1200	132
614	490	699	258	1260	134
644	495	729	259	1320	134
674	495	759	260	1380	135
704	497	789	261	1440	136
734	499	819	262	1500	137
764	473	849	262	1560	137
794	482	879	263	1620	137
824	488	909	238	1680	137
854	508	923	227	1740	138
884	511	1043	269	1800	138
914	524	1163	269	1860	138
944	513	1283	270	1920	139
974	519	1403	272	1980	138
1004	515	1523	273	2040	139
1026	495	1643	273	2100	139
1146	534	1763	273	2160	139
1266	537	1883	275	2220	139
1386	538	2003	276	2280	140
1506	539	2123	277	2340	139
1626	539	2243	277	2400	140
1746	533	2363	278	2460	140
1866	541	2483	278	2520	140
1986	541	2603	278	2580	141
2106	543	2723	279	2640	140
2226	544	2843	280	2700	140
2346	545	2963	280	2760	141
2466	545	3083	281	2820	141
2586	546	3203	281	2880	141
2706	546	3323	282	2940	141
2826	547	3443	283	3000	142
2946	546	3563	283	3060	141
3066	547	3683	283	3120	141
3186	547	3803	284	3180	141
3306	548	3923	284	3240	142
3426	548	4043	285	3300	142
3546	548	4163	286	3360	141
3666	548	4283	286	3420	142
3786	549	4403	287	3480	142
3906	550	4523	287	3540	142
4026	550	4643	287	3600	142
4146	551	4763	287	3660	142
4266	551	4883	288	3720	142
4386	552	5003	288	3780	143
4506	552	5123	288	3840	144
4626	552	5243	289	3900	143
4746	553	5363	290	3960	142
4866	553	5483	290	4020	143
4986	554	5603	290	4080	143
5106	554	5723	291	4140	143
5226	554	5843	291	4200	143
5346	555	5963	291	4260	143
5466	555	6083	292	4320	143
5586	555	6203	292	4380	143
5706	555	6323	293	4440	143
5826	557	6443	292	4500	144
5946	557	6563	293	4560	144
6066	557	6683	293	4620	143
6186	558	6803	294	4680	144
6306	558	6923	294	4740	144
6426	558	7043	294	4800	143
6546	558	7163	295	4860	143
6666	559	7283	295	4920	143
6786	559	7403	296	4980	144
6906	559	7523	296	5040	143
7026	560	7643	296	5100	143
7146	558	7763	297	5160	143
7266	560	7883	297	5220	143
7386	559	8003	297	5280	143
7506	560	8123	297	5340	143
7626	560	8243	298	5400	144
7746	561	8363	297	5460	142
7866	561	8483	298	5520	143
7986	561	8603	299	5580	143
8106	563	8723	299	5640	144
8226	563	8843	299	5700	143
8346	564	8963	300	5760	142
8466	565	9083	300	5820	143
8586	565	9203	301	5880	144
8706	565	9323	301	5940	143
8826	565	9443	301	6000	143
8946	566	9563	301	6060	143
9066	567	9683	302	6120	143
9186	567	9803	301	6180	142
9306	568	9923	301	6240	143
9426	568	10043	302	6300	142
9546	569	10163	303	6360	142
9666	570	10283	303	6420	142
9786	570	10403	303	6480	143
9906	570	10523	303	6540	143
10026	571	10643	304	6600	142
10146	570	10763	304	6660	142
10266	571	10883	304	6720	142
10386	571	11003	304	6780	142
10506	571	11123	305	6840	141
10626	572	11243	305	6900	141
10746	572	11363	305	6960	142
10866	572	11483	305	7020	142
10986	572	11603	305	7080	142
11106	572	11723	306	7140	142
11226	573	11843	306	7200	142
11346	573	11963	306	7260	141
11466	574	12083	306	7320	142
11586	575	12203	307	7380	141
11706	575	12323	307	7440	141
11826	575	12443	308	7500	141
11946	577	12563	308	7560	141
12066	576	12683	308	7620	141
12186	577	12803	308	7680	141
12306	578	12923	309	7740	141
12426	573	13043	309	7800	141
12546	574	13163	309	7860	140
12666	574	13283	309	7920	141
12786	574	13403	310	7980	141
12906	575	13523	310	8040	141
13026	575	13643	311	8100	141
13146	577	13763	310	8160	140
13266	577	13883	311	8220	140
13386	578	14003	312	8280	141
13506	578	14123	311	8340	140
13626	579	14243	312	8400	140
13746	580	14363	312	8460	141
13866	581	14483	312	8520	140
13986	581	14603	312	8580	140
14106	581	14723	313	8640	140
14226	582	14843	313	8700	139
14346	583	14963	313	8760	138
14466	584	15083	314	8820	139
14586	585	15203	315	8880	139
14706	585	15323	315	8940	139
14826	585	15443	316	9000	139
14946	585	15563	316	9060	139
15066	586	15683	317	9120	139
15186	587	15803	317	9180	139
15306	587	15923	317	9240	139
15426	588	16043	318	9300	138
15546	588	16163	318	9360	138
15666	589	16283	318	9420	138
15786	589	16403	318	9480	138
15906	589	16523	318	9540	138
16026	590	16643	318	9600	138
16146	590	16763	318	9660	138
16266	591	16883	318	9720	138
16386	591	17003	319	9780	138
16506	592	17123	320	9840	138
16626	593	17243	320	9900	137
16746	594	17363	321	9960	138
16866	595	17483	321	10020	137
16986	596	17603	320	10080	137
17106	597	17723	321	10140	137
17226	597	17843	321	10200	137
17346	598	17963	321	10260	137
17466	598	18083	321	10320	138
17586	600	18203	321	10380	137
17706	600	18323	322	10440	137
17826	600	18443	322	10500	137
17946	600	18563	323	10560	137
18066	601	18683	323	10620	137
18186	602	18803	324	10680	136
18306	603	18923	323	10740	137
18426	603	19043	324	10800	137
18546	604	19163	324	10860	137
18666	605	19283	324	10920	135
18786	605	19403	325	10980	136
18906	605	19523	325	11040	136
19026	606	19643	324	11100	135
19146	607	19763	325	11160	135
19266	607	19883	325	11220	135
19386	608	20003	326	11280	135
19506	609	20123	326	11340	135
19626	610	20243	326	11400	135
19746	611	20363	326	11460	134
19866	611	20483	326	11520	135
19986	611	20603	327	11580	135
20106	612	20723	328	11640	135
20226	613	20843	327	11700	135
20346	613	20963	328	11760	135
20466	613	21083	328	11820	135
20586	615	21203	328	11880	135
20706	614	21323	328	11940	134
20826	615	21443	329	12000	135
20946	615	21563	329	12060	135
21066	616	21683	329	12120	135
21186	616	21803	329	12180	134
21306	616	21923	330	12240	134
21426	618	22043	330	12300	134
21546	618	22163	330	12360	134
21666	618	22283	330	12420	133
21786	618	22403	331	12480	133
21906	619	22523	331	12540	133
22026	612	22643	331	12600	133
22146	616	22763	331	12660	134
22266	616	22883	331	12720	133
22386	615	23003	331	12780	133
22506	616	23123	331	12840	133
22626	616	23243	331	12900	133
22746	617	23363	332	12960	133
22866	617	23483	332	13020	132
22986	617	23603	333	13080	133
23106	618	23723	332	13140	132
23226	618	23843	333	13200	132
23346	619	23963	332	13260	132
23466	620	24083	333	13320	133
23586	620	24203	334	13380	132
23706	621	24323	333	13440	133
23826	621	24443	333	13500	133
23946	622	24563	334	13560	132
24066	622	24683	333	13620	132
24186	623	24803	333	13680	132
24306	623	24923	334	13740	132
24426	623	25043	335	13800	131
24546	623	25163	335	13860	131
24666	624	25283	334	13920	131
24786	624	25403	335	13980	131
24906	624	25523	335	14040	132
25026	625	25643	335	14100	130
25146	626	25763	335	14160	131
25266	625	25883	336	14220	131
25386	625	26003	335	14280	131
25506	627	26123	336	14340	130
25626	627	26243	336	14400	130
25746	627	26363	337	14460	130
25866	628	26483	336	14520	131
25986	628	26603	336	14580	130
26106	629	26723	336	14640	131
26226	629	26843	336	14700	131
26346	629	26963	337	14760	130
26466	630	27083	336	14820	130
26586	630	27203	336	14880	130
26706	630	27323	337	14940	130
26826	631	27443	337	15000	131
26946	631	27563	338	15060	130
27066	632	27683	338	15120	130
27186	632	27803	338	15180	130
27306	632	27923	338	15240	130
27426	633	28043	338	15300	130
27546	634	28163	337	15360	130
27666	634	28283	339	15420	129
27786	634	28403	338	15480	128
27906	635	28523	339	15540	129
28026	635	28643	339	15600	129
28146	628	28763	338	15660	129
28266	631	28883	339	15720	129
28386	630	29003	339	15780	130
28506	630	29123	339	15840	129
28626	629	29243	339	15900	129
28746	630	29363	339	15960	128
28866	630	29483	340	16020	130
28986	630	29603	340	16080	129
29106	630	29723	339	16140	128
29226	631	29843	340	16200	129
29346	632	29963	339	16260	129
29466	633	30083	340	16320	128
29586	633	30203	340	16380	130
29706	634	30323	340	16440	129
29826	634	30443	341	16500	129
29946	634	30563	340	16560	129
30066	634	30683	341	16620	129
30186	635	30803	341	16680	129
30306	634	30923	341	16740	129
30426	635	31043	341	16800	129
30546	636	31163	342	16860	129
30666	636	31283	341	16920	129
30786	636	31403	341	16980	129
30906	635	31523	342	17040	128
31026	634	31643	341	17100	128
31146	636	31763	342	17160	128
31266	632	31883	341	17220	129
31386	636	32003	342	17280	128
31506	633	32123	342	17340	129
31626	634	32243	341	17400	129
31746	635	32363	341	17460	128
31866	633	32483	343	17520	128
31986	635	32603	343	17580	128
32106	634	32723	343	17640	129
32226	635	32843	343	17700	127
32346	635	32963	343	17760	128
32466	636	33083	343	17820	128
32586	610	33203	343	17880	129
32706	627	33323	343	17940	128
32826	630	33443	344	18000	128
32946	628	33563	342	18060	127
33066	627	33683	343	18120	127
33186	626	33803	343	18180	128
33306	626	33923	343	18240	128
33426	626	34043	343	18300	128
33546	626	34163	344	18360	128
33666	626	34283	343	18420	127
33786	627	34403	343	18480	127
33906	627	34523	344	18540	128
34026	628	34643	344	18600	127
34146	629	34763	345	18660	127
34266	629	34883	344	18720	127
34386	629	35003	345	18780	127
34506	630	35123	344	18840	127
34626	631	35243	344	18900	127
34746	631	35363	344	18960	127
34866	630	35483	344	19020	126
34986	631	35603	344	19080	127
35106	631	35723	345	19140	127
35226	631	35843	345	19200	126
35346	632	35963	345	19260	127
35466	632	36083	345	19320	127
35586	633	36203	345	19380	127
35706	632	36323	345	19440	127
35826	633	36443	345	19500	126
35946	633	36563	346	19560	127
36066	633	36683	345	19620	127
36186	633	36803	345	19680	127
36306	634	36923	346	19740	127
36426	634	37043	345	19800	126
36546	635	37163	346	19860	126
36666	635	37283	346	19920	126
36786	635	37403	346	19980	126
36906	635	37523	346	20040	127
37026	636	37643	347	20100	126
37146	637	37763	346	20160	126
37266	636	37883	346	20220	126
37386	637	38003	346	20280	127
37506	636	38123	346	20340	127
37626	637	38243	346	20400	126
37746	637	38363	347	20460	126
37866	638	38483	346	20520	126
37986	637	38603	347	20580	127
38106	639	38723	347	20640	126
38226	638	38843	346	20700	126
38346	634	38963	347	20760	126
38466	638	39083	346	20820	126
38586	638	39203	347	20880	127
38706	638	39323	347	20940	126
38826	640	39443	347	21000	126
38946	639	39563	347	21060	125
39066	639	39683	347	21120	126
39186	639	39803	348	21180	126
39306	640	39923	347	21240	126
39426	639	40043	347	21300	126
39546	640	40163	347	21360	126
39666	611	40283	347	21420	126
39786	632	40403	347	21480	125
39906	632	40523	348	21540	126
40026	632	40643	347	21600	126
40146	632	40763	347	21660	125
40266	631	40883	346	21720	125
40386	631	41003	347	21780	125
40506	628	41123	347	21840	126
40626	632	41243	347	21900	126
40746	632	41363	347	21960	126
40866	632	41483	346	22020	125
40986	632	41603	347	22080	125
41106	632	41723	348	22140	125
41226	632	41843	347	22200	125
41346	634	41963	347	22260	125
41466	633	42083	348	22320	125
41586	634	42203	348	22380	125
41706	634	42323	347	22440	125
41826	635	42443	347	22500	125
41946	634	42563	347	22560	125
42066	635	42683	347	22620	125
42186	636	42803	347	22680	125
42306	634	42923	347	22740	124
42426	634	43043	347	22800	125
42546	634	43163	347	22860	125
42666	635	43283	348	22920	125
42786	634	43403	347	22980	125
42906	635	43523	347	23040	125
43026	635	43643	347	23100	125
43146	634	43763	347	23160	125
43266	635	43883	347	23220	124
43386	635	44003	348	23280	124
43506	634	44123	347	23340	124
43626	635	44243	347	23400	124
43746	636	44363	347	23460	124
43866	636	44483	347	23520	124
43986	635	44603	347	23580	125
44106	600	44723	347	23640	124
44226	626	44843	348	23700	125
44346	626	44963	347	23760	123
44466	626	45083	347	23820	124
44586	625	45203	347	23880	125
44706	625	45323	347	23940	125
44826	625	45443	347	24000	125
44946	625	45563	347	24060	124
45066	624	45683	347	24120	125
45186	625	45803	347	24180	125
45306	626	45923	348	24240	124
45426	627	46043	347	24300	124
45546	626	46163	347	24360	124
45666	626	46283	347	24420	124
45786	627	46403	347	24480	125
45906	628	46523	347	24540	125
46026	628	46643	347	24600	124
46146	628	46763	347	24660	124
46266	628	46883	346	24720	124
46386	628	47003	347	24780	124
46506	628	47123	347	24840	124
46626	629	47243	347	24900	124
46746	629	47363	346	24960	124
46866	629	47483	334	25020	125
46986	628	47603	345	25080	124
47106	629	47723	347	25140	124
47226	627	47843	347	25200	125
47346	629	47963	346	25260	124
47466	629	48083	347	25320	124
47586	629	48203	347	25380	124
47706	628	48323	348	25440	123
47826	628	48443	348	25500	123
47946	629	48563	348	25560	124
48066	629	48683	348	25620	124
48186	629	48803	348	25680	124
48306	629	48923	348	25740	124
48426	628	49043	348	25800	123
48546	607	49163	348	25860	123
48666	625	49283	348	25920	123
48786	625	49403	348	25980	124
48906	624	49523	348	26040	124
49026	622	49643	349	26100	124
49146	623	49763	348	26160	123
49266	623	49883	349	26220	124
49386	623	50003	349	26280	124
49506	624	50123	349	26340	123
49626	623	50243	349	26400	123
49746	623	50363	350	26460	124
49866	624	50483	349	26520	123
49986	625	50603	350	26580	123
50106	625	50723	350	26640	124
50226	625	50843	350	26700	123
50346	625	50963	350	26760	124
50466	627	51083	350	26820	124
50586	625	51203	350	26880	124
50706	626	51323	350	26940	123
50826	627	51443	350	27000	124
50946	628	51563	349	27060	124
51066	628	51683	349	27120	123
51186	628	51803	350	27180	123
51306	628	51923	349	27240	123
51426	627	52043	349	27300	123
51546	627	52163	350	27360	124
51666	628	52283	350	27420	123
51786	629	52403	349	27480	122
51906	627	52523	350	27540	123
52026	628	52643	350	27600	123
52146	629	52763	349	27660	124
52266	629	52883	349	27720	123
52386	628	53003	350	27780	124
52506	629	53123	350	27840	123
52626	629	53243	350	27900	123
52746	629	53363	349	27960	123
52866	629	53483	349	28020	123
52986	629	53603	349	28080	123
53106	629	53723	350	28140	124
53226	629	53843	350	28200	123
53346	630	53963	350	28260	123
53466	630	54083	350	28320	123
53586	630	54203	350	28380	123
53706	630	54323	349	28440	123
53826	630	54443	349	28500	122
53946	631	54563	350	28560	122
54066	629	54683	350	28620	123
54186	630	54803	350	28680	123
54306	631	54923	350	28740	123
54426	631	55043	349	28800	123
54546	631	55163	349	28860	123
54666	631	55283	350	28920	123
54786	632	55403	350	28980	123
54906	631	55523	350	29040	123
55026	631	55643	350	29100	123
55146	632	55763	350	29160	123
55266	633	55883	351	29220	122
55386	633	56003	350	29280	123
55506	633	56123	350	29340	123
55626	633	56243	350	29400	123
55746	633	56363	351	29460	123
55866	633	56483	350	29520	123
55986	633	56603	350	29580	123
56106	633	56723	349	29640	123
56226	634	56843	350	29700	123
56346	634	56963	350	29760	122
56466	634	57083	349	29820	123
56586	633	57203	349	29880	123
56706	634	57323	348	29940	121
56826	635	57443	349	30000	123
56946	635	57563	349	30060	122
57066	634	57683	349	30120	122
57186	635	57803	349	30180	123
57306	635	57923	350	30240	122
57426	636	58043	348	30300	122
57546	635	58163	349	30360	123
57666	636	58283	349	30420	123
57786	636	58403	349	30480	122
57906	635	58523	349	30540	123
58026	636	58643	348	30600	123
58146	636	58763	349	30660	123
58266	636	58883	348	30720	122
58386	636	59003	348	30780	122
58506	637	59123	349	30840	122
58626	636	59243	348	30900	123
58746	637	59363	348	30960	122
58866	637	59483	321	31020	122
58986	638	59603	345	31080	122
59106	637	59723	347	31140	122
59226	638	59843	347	31200	122
59346	638	59963	347	31260	122
59466	639	60083	347	31320	121
59586	638	60203	347	31380	122
59706	639	60323	347	31440	122
59826	639	60443	347	31500	122
59946	638	60563	347	31560	122
60066	639	60683	348	31620	121
60186	639	60803	348	31680	122
60306	640	60923	347	31740	121
60426	639	61043	348	31800	122
60546	640	61163	347	31860	121
60666	640	61283	347	31920	123
60786	639	61403	347	31980	122
60906	640	61523	347	32040	122
61026	639	61643	329	32100	122
61146	641	61763	328	32160	122
61266	640	61883	330	32220	122
61386	640	62003	335	32280	121
61506	641	62123	348	32340	121
61626	641	62243	347	32400	121
61746	641	62363	348	32460	121
61866	641	62483	348	32520	122
61986	641	62603	348	32580	121
62106	641	62723	348	32640	121
62226	641	62843	348	32700	121
62346	642	62963	348	32760	121
62466	641	63083	349	32820	121
62586	642	63203	348	32880	121
62706	641	63323	349	32940	121
62826	641	63443	349	33000	121
62946	642	63563	349	33060	121
63066	643	63683	349	33120	120
63186	641	63803	349	33180	121
63306	642	63923	349	33240	121
63426	642	64043	348	33300	120
63546	642	64163	349	33360	120
63666	642	64283	348	33420	121
63786	640	64403	349	33480	121
63906	643	64523	349	33540	121
64026	642	64643	349	33600	121
64146	641	64763	349	33660	121
64266	643	64883	350	33720	121
64386	643	65003	349	33780	121
64506	642	65123	349	33840	120
64626	642	65243	349	33900	120
64746	642	65363	349	33960	120
64866	642	65483	350	34020	120
64986	642	65603	349	34080	120
65106	641	65723	349	34140	120
65226	642	65843	349	34200	121
65346	642	65963	349	34260	121
65466	643	66083	349	34320	121
65586	642	66203	349	34380	121
65706	642	66323	349	34440	120
65826	643	66443	350	34500	120
65946	642	66563	350	34560	120
66066	643	66683	350	34620	120
66186	642	66803	350	34680	120
66306	641	66923	349	34740	120
66426	642	67043	350	34800	120
66546	642	67163	350	34860	120
66666	643	67283	350	34920	120
66786	642	67403	349	34980	120
66906	642	67523	350	35040	120
67026	643	67643	350	35100	119
67146	643	67763	350	35160	120
67266	643	67883	350	35220	119
67386	643	68003	350	35280	120
67506	642	68123	349	35340	120
67626	642	68243	349	35400	120
67746	643	68363	350	35460	120
67866	643	68483	349	35520	120
67986	643	68603	349	35580	119
68106	643	68723	350	35640	120
68226	642	68843	349	35700	120
68346	642	68963	351	35760	120
68466	642	69083	350	35820	119
68586	643	69203	350	35880	120
68706	643	69323	350	35940	120
68826	640	69443	349	36000	118
68946	642	69563	350	36060	119
69066	642	69683	350	36120	119
69186	641	69803	350	36180	119
69306	640	69923	350	36240	119
69426	643	70043	350	36300	120
69546	643	70163	349	36360	119
69666	637	70283	349	36420	119
69786	642	70403	349	36480	120
69906	642	70523	350	36540	119
70026	641	70643	349	36600	120
70146	642	70763	348	36660	119
70266	642	70883	349	36720	119
70386	643	71003	349	36780	119
70506	643	71123	349	36840	119
70626	643	71243	350	36900	119
70746	644	71363	350	36960	120
70866	642	71483	349	37020	119
70986	643	71603	349	37080	119
71106	643	71723	349	37140	119
71226	643	71843	350	37200	119
71346	643	71963	350	37260	118
71466	643	72083	349	37320	119
71586	643	72203	349	37380	119
71706	643	72323	349	37440	118
71826	642	72443	349	37500	118
71946	642	72563	349	37560	118
72066	642	72683	350	37620	118
72186	642	72803	348	37680	119
72306	642	72923	349	37740	118
72426	643	73043	349	37800	119
72546	643	73163	349	37860	118
72666	643	73283	349	37920	118
72786	643	73403	349	37980	119
72906	643	73523	348	38040	119
73026	642	73643	348	38100	118
73146	642	73763	330	38160	118
73266	643	73883	347	38220	118
73386	642	74003	347	38280	118
73506	643	74123	348	38340	118
73626	642	74243	347	38400	118
73746	642	74363	348	38460	117
73866	642	74483	348	38520	118
73986	642	74603	349	38580	118
74106	642	74723	349	38640	117
74226	642	74843	349	38700	118
74346	643	74963	349	38760	117
74466	642	75083	349	38820	114
74586	642	75203	348	38880	116
74706	642	75323	350	38940	117
74826	642	75443	350	39000	116
74946	642	75563	349	39060	116
75066	641	75683	349	39120	117
75186	642	75803	349	39180	117
75306	641	75923	349	39240	116
75426	642	76043	349	39300	116
75546	641	76163	349	39360	116
75666	642	76283	350	39420	116
75786	642	76403	349	39480	116
75906	642	76523	350	39540	116
76026	642	76643	350	39600	116
76146	642	76763	349	39660	116
76266	642	76883	350	39720	116
76386	642	77003	350	39780	116
76506	642	77123	349	39840	116
76626	642	77243	350	39900	116
76746	642	77363	350	39960	116
76866	641	77483	350	40020	116
76986	642	77603	351	40080	116
77106	642	77723	350	40140	116
77226	641	77843	350	40200	116
77346	641	77963	350	40260	116
77466	642	78083	349	40320	116
77586	642	78203	350	40380	115
77706	642	78323	350	40440	115
77826	641	78443	350	40500	116
77946	642	78563	350	40560	116
78066	641	78683	350	40620	116
78186	642	78803	350	40680	116
78306	639	78923	350	40740	116
78426	641	79043	350	40800	116
78546	640	79163	350	40860	116
78666	641	79283	349	40920	116
78786	642	79403	350	40980	116
78906	642	79523	350	41040	116
79026	639	79643	349	41100	115
79146	640	79763	349	41160	116
79266	639	79883	349	41220	116
79386	641	80003	349	41280	117
79506	641	80123	350	41340	116
79626	641	80243	350	41400	115
79746	641	80363	350	41460	116
79866	641	80483	350	41520	116
79986	641	80603	350	41580	116
80106	640	80723	350	41640	116
80226	641	80843	350	41700	116
80346	641	80963	350	41760	115
80466	641	81083	349	41820	115
80586	639	81203	350	41880	115
80706	640	81323	350	41940	116
80826	640	81443	350	42000	116
80946	641	81563	350	42060	115
81066	639	81683	350	42120	116
81186	640	81803	349	42180	116
81306	640	81923	349	42240	116
81426	640	82043	350	42300	115
81546	640	82163	350	42360	115
81666	640	82283	350	42420	115
81786	640	82403	349	42480	116
81906	640	82523	350	42540	116
82026	640	82643	350	42600	116
82146	640	82763	349	42660	116
82266	640	82883	350	42720	116
82386	640	83003	350	42780	116
82506	640	83123	349	42840	115
82626	639	83243	349	42900	116
82746	639	83363	349	42960	116
82866	639	83483	320	43020	116
82986	640	83603	348	43080	116
83106	640	83723	349	43140	116
83226	638	83843	349	43200	116
83346	635	83963	350	43260	115
83466	633	84083	350	43320	115
83586	634	84203	350	43380	116
83706	633	84323	349	43440	116
83826	633	84443	350	43500	115
83946	633	84563	350	43560	115
84066	633	84683	350	43620	116
84186	633	84803	351	43680	116
84306	633	84923	351	43740	116
84426	633	85043	351	43800	115
84546	633	85163	351	43860	115
84666	633	85283	350	43920	116
84786	634	85403	351	43980	115
84906	633	85523	351	44040	116
85026	633	85643	351	44100	116
85146	632	85763	351	44160	116
85266	634	85883	351	44220	116
85386	634	86003	352	44280	116
85506	634	86123	352	44340	116
85626	634	86243	351	44400	115
85746	634	86363	351	44460	115
85866	635	86483	351	44520	116
85986	634	86603	352	44580	116
86106	634	86723	351	44640	115
86226	634	86843	352	44700	115
86346	633	86963	352	44760	116
86466	633	87083	352	44820	115
86586	635	87203	351	44880	116
86706	634	87323	352	44940	116
86826	635	87443	352	45000	117
86946	634	87563	352	45060	116
87066	634	87683	352	45120	116
87186	634	87803	352	45180	116
87306	634	87923	352	45240	116
87426	633	88043	352	45300	115
87546	635	88163	351	45360	116
87666	634	88283	352	45420	117
87786	634	88403	352	45480	116
87906	635	88523	352	45540	117
88026	634	88643	351	45600	117
88146	634	88763	352	45660	116
88266	618	88883	352	45720	116
88386	629	89003	352	45780	117
88506	628	89123	353	45840	117
88626	628	89243	352	45900	116
88746	627	89363	352	45960	116
88866	627	89483	352	46020	117
88986	628	89603	353	46080	116
89106	626	89723	352	46140	116
89226	627	89843	352	46200	116
89346	627	89963	352	46260	116
89466	627	90083	351	46320	116
89586	628	90203	352	46380	116
89706	628	90323	352	46440	115
89826	628	90443	352	46500	116
89946	628	90563	352	46560	115
90066	627	90683	352	46620	116
90186	629	90803	351	46680	115
90306	629	90923	352	46740	115
90426	629	91043	351	46800	115
90546	629	91163	352	46860	115
90666	629	91283	352	46920	116
90786	628	91403	351	46980	115
90906	630	91523	352	47040	115
91026	630	91643	351	47100	116
91146	628	91763	351	47160	116
91266	629	91883	351	47220	115
91386	629	92003	351	47280	116
91506	630	92123	351	47340	117
91626	630	92243	351	47400	116
91746	630	92363	350	47460	117
91866	630	92483	351	47520	116
91986	610	92603	350	47580	116
92106	623	92723	350	47640	115
92226	623	92843	350	47700	115
92346	621	92963	351	47760	116
92466	623	93083	349	47820	116
92586	622	93203	350	47880	116
92706	622	93323	350	47940	116
92826	622	93443	350	48000	116
92946	622	93563	350	48060	116
93066	622	93683	349	48120	116
93186	623	93803	351	48180	116
93306	622	93923	351	48240	116
93426	622	94043	350	48300	116
93546	622	94163	350	48360	116
93666	623	94283	351	48420	116
93786	622	94403	350	48480	116
93906	621	94523	350	48540	116
94026	621	94643	350	48600	116
94146	622	94763	350	48660	116
94266	622	94883	349	48720	116
94386	621	95003	349	48780	116
94506	621	95123	350	48840	115
94626	624	95243	349	48900	116
94746	622	95363	350	48960	116
94866	624	95483	350	49020	116
94986	624	95603	348	49080	116
95106	624	95723	349	49140	116
95226	625	95843	348	49200	116
95346	625	95963	350	49260	115
95466	623	96083	350	49320	116
95586	622	96203	349	49380	116
95706	625	96323	349	49440	116
95826	625	96443	349	49500	116
95946	626	96563	348	49560	115
96066	626	96683	349	49620	116
96186	626	96803	348	49680	115
96306	626	96923	348	49740	117
96426	627	97043	349	49800	116
96546	627	97163	349	49860	116
96666	627	97283	349	49920	116
96786	596	97403	348	49980	116
96906	621	97523	349	50040	116
97026	619	97643	348	50100	116
97146	621	97763	349	50160	116
97266	622	97883	348	50220	116
97386	619	98003	305	50280	116
97506	619	98123	346	50340	115
97626	621	98243	348	50400	116
97746	621	98363	349	50460	116
97866	621	98483	349	50520	116
97986	621	98603	351	50580	117
98106	623	98723	350	50640	117
98226	622	98843	351	50700	117
98346	623	98963	351	50760	116
98466	623	99083	352	50820	117
98586	623	99203	353	50880	116
98706	623	99323	352	50940	116
98826	624	99443	353	51000	117
98946	624	99563	353	51060	116
99066	625	99683	353	51120	117
99186	625	99803	353	51180	117
99306	625	99923	353	51240	116
99426	625	100043	353	51300	117
99546	626	100163	353	51360	117
99666	626	100283	354	51420	117
99786	627	100403	354	51480	117
99906	626	100523	354	51540	117
100026	627	100643	354	51600	116
100146	626	100763	354	51660	117
100266	626	100883	354	51720	117
100386	627	101003	355	51780	117
100506	628	101123	355	51840	118
100626	628	101243	355	51900	117
100746	628	101363	355	51960	117
100866	629	101483	355	52020	117
100986	628	101603	356	52080	117
101106	628	101723	355	52140	117
101226	630	101843	355	52200	117
101346	629	101963	355	52260	117
101466	629	102083	355	52320	117
101586	630	102203	355	52380	117
101706	629	102323	356	52440	118
101826	629	102443	356	52500	117
101946	631	102563	356	52560	117
102066	630	102683	356	52620	118
102186	630	102803	356	52680	117
102306	630	102923	356	52740	117
102426	631	103043	355	52800	117
102546	630	103163	356	52860	117
102666	631	103283	356	52920	118
102786	631	103403	356	52980	117
102906	632	103523	356	53040	118
103026	632	103643	356	53100	118
103146	631	103763	356	53160	117
103266	632	103883	357	53220	118
103386	632	104003	357	53280	118
103506	633	104123	356	53340	118
103626	632	104243	356	53400	118
103746	634	104363	357	53460	118
103866	633	104483	356	53520	118
103986	633	104603	355	53580	118
104106	633	104723	356	53640	118
104226	634	104843	357	53700	118
104346	634	104963	356	53760	118
104466	634	105083	356	53820	118
104586	634	105203	356	53880	118
104706	635	105323	357	53940	118
104826	634	105443	357	54000	118
104946	635	105563	356	54060	119
105066	635	105683	356	54120	118
105186	635	105803	356	54180	119
105306	635	105923	355	54240	119
105426	635	106043	357	54300	119
105546	635	106163	356	54360	118
105666	636	106283	355	54420	118
105786	636	106403	356	54480	119
105906	636	106523	356	54540	100
106026	636	106643	357	54600	100
106146	636	106763	356	54660	119
106266	636	106883	356	54720	119
106386	636	107003	356	54780	119
106506	636	107123	356	54840	119
106626	637	107243	356	54900	119
106746	637	107363	355	54960	119
106866	637	107483	355	55020	119
106986	637	107603	355	55080	119
107106	637	107723	355	55140	119
107226	637	107843	356	55200	119
107346	638	107963	356	55260	118
107466	638	108083	355	55320	119
107586	638	108203	356	55380	119
107706	638	108323	356	55440	119
107826	639	108443	356	55500	119
107946	639	108563	355	55560	119
108066	619	108683	355	55620	118
108186	633	108803	355	55680	119
108306	634	108923	356	55740	120
108426	633	109043	355	55800	119
108546	633	109163	355	55860	119
108666	633	109283	356	55920	120
108786	633	109403	356	55980	119
108906	633	109523	355	56040	120
109026	633	109643	354	56100	120
109146	633	109763	354	56160	120
109266	633	109883	354	56220	120
109386	634	110003	355	56280	120
109506	634	110123	355	56340	120
109626	634	110243	354	56400	120
109746	633	110363	355	56460	120
109866	634	110483	355	56520	120
109986	635	110603	355	56580	120
110106	634	110723	354	56640	121
110226	635	110843	355	56700	120
110346	635	110963	355	56760	120
110466	635	111083	355	56820	120
110586	636	111203	355	56880	120
110706	636	111323	354	56940	120
110826	636	111443	354	57000	120
110946	637	111563	354	57060	121
111066	636	111683	354	57120	120
111186	636	111803	355	57180	120
111306	637	111923	354	57240	120
111426	637	112043	355	57300	120
111546	638	112163	354	57360	120
111666	638	112283	354	57420	120
111786	638	112403	354	57480	120
111906	638	112523	354	57540	120
112026	637	112643	354	57600	120
112146	639	112763	354	57660	121
112266	639	112883	355	57720	121
112386	639	113003	354	57780	120
112506	639	113123	354	57840	120
112626	639	113243	354	57900	121
112746	640	113363	354	57960	121
112866	639	113483	354	58020	120
112986	639	113603	353	58080	121
113106	640	113723	354	58140	121
113226	640	113843	353	58200	120
113346	641	113963	354	58260	121
113466	641	114083	354	58320	121
113586	641	114203	354	58380	121
113706	641	114323	354	58440	121
113826	641	114443	354	58500	121
113946	642	114563	353	58560	121
114066	642	114683	354	58620	121
114186	642	114803	353	58680	121
114306	642	114923	354	58740	121
114426	642	115043	354	58800	121
114546	642	115163	354	58860	121
114666	632	115283	354	58920	122
114786	638	115403	354	58980	121
114906	637	115523	354	59040	122
115026	637	115643	354	59100	122
115146	637	115763	354	59160	122
115266	637	115883	354	59220	121
115386	637	116003	353	59280	122
115506	637	116123	354	59340	121
115626	638	116243	353	59400	122
115746	637	116363	353	59460	122
115866	637	116483	354	59520	121
115986	637	116603	353	59580	122
116106	637	116723	353	59640	122
116226	638	116843	353	59700	121
116346	638	116963	353	59760	122
116466	638	117083	353	59820	122
116586	638	117203	354	59880	122
116706	638	117323	354	59940	122
116826	638	117443	352	60000	122
116946	638	117563	352	60060	121
117066	638	117683	353	60120	122
117186	638	117803	353	60180	122
117306	639	117923	353	60240	122
117426	638	118043	354	60300	122
117546	638	118163	353	60360	121
117666	639	118283	353	60420	122
117786	639	118403	353	60480	123
117906	638	118523	354	60540	122
118026	639	118643	354	60600	122
118146	638	118763	354	60660	122
118266	638	118883	353	60720	122
118386	638	119003	353	60780	122
118506	639	119123	353	60840	122
118626	639	119243	353	60900	122
118746	639	119363	353	60960	122
118866	639	119483	353	61020	102
118986	639	119603	353	61080	102
119106	639	119723	354	61140	123
119226	639	119843	353	61200	122
119346	640	119963	353	61260	122
119466	639	120083	353	61320	122
119586	639	120203	353	61380	122
119706	641	120323	354	61440	122
119826	641	120443	353	61500	122
119946	640	120563	353	61560	121
120066	639	120683	352	61620	123
120186	640	120803	353	61680	123
120306	640	120923	352	61740	122
120426	640	121043	353	61800	122
120546	640	121163	353	61860	122
120666	641	121283	353	61920	123
120786	640	121403	353	61980	123
120906	641	121523	352	62040	123
121026	641	121643	353	62100	123
121146	641	121763	352	62160	122
121266	641	121883	353	62220	123
121386	640	122003	353	62280	122
121506	641	122123	353	62340	122
121626	641	122243	353	62400	122
121746	641	122363	353	62460	123
121866	641	122483	353	62520	123
121986	641	122603	353	62580	123
122106	641	122723	353	62640	122
122226	642	122843	352	62700	123
122346	641	122963	353	62760	123
122466	641	123083	352	62820	122
122586	642	123203	352	62880	123
122706	641	123323	353	62940	123
122826	642	123443	352	63000	123
122946	641	123563	352	63060	123
123066	641	123683	352	63120	123
123186	642	123803	353	63180	122
123306	610	123923	353	63240	123
123426	634	124043	353	63300	122
123546	635	124163	352	63360	122
123666	634	124283	352	63420	122
123786	633	124403	352	63480	122
123906	633	124523	352	63540	123
124026	632	124643	352	63600	123
124146	633	124763	353	63660	122
124266	632	124883	352	63720	123
124386	631	125003	352	63780	123
124506	632	125123	352	63840	123
124626	632	125243	352	63900	123
124746	633	125363	352	63960	123
124866	633	125483	352	64020	123
124986	633	125603	352	64080	123
125106	630	125723	352	64140	123
125226	633	125843	352	64200	123
125346	634	125963	352	64260	123
125466	634	126083	352	64320	123
125586	634	126203	353	64380	123
125706	634	126323	353	64440	122
125826	634	126443	351	64500	123
125946	634	126563	352	64560	123
126066	634	126683	351	64620	123
126186	635	126803	351	64680	123
126306	634	126923	352	64740	123
126426	635	127043	351	64800	123
126546	635	127163	351	64860	124
126666	635	127283	351	64920	123
126786	634	127403	352	64980	123
126906	635	127523	352	65040	122
127026	634	127643	352	65100	123
127146	635	127763	351	65160	124
127266	632	127883	351	65220	123
127386	635	128003	351	65280	123
127506	635	128123	351	65340	123
127626	634	128243	350	65400	123
127746	635	128363	350	65460	123
127866	635	128483	351	65520	124
127986	634	128603	350	65580	122
128106	634	128723	351	65640	123
128226	634	128843	351	65700	123
128346	634	128963	350	65760	123
128466	597	129083	350	65820	123
128586	627	129203	350	65880	123
128706	628	129323	350	65940	123
128826	627	129443	349	66000	123
128946	628	129563	349	66060	123
129066	627	129683	349	66120	123
129186	626	129803	350	66180	123
129306	625	129923	349	66240	124
129426	625	130043	350	66300	123
129546	626	130163	350	66360	123
129666	625	130283	350	66420	123
129786	626	130403	350	66480	123
129906	626	130523	350	66540	123
130026	626	130643	350	66600	122
130146	626	130763	349	66660	123
130266	627	130883	349	66720	123
130386	627	131003	348	66780	123
130506	627	131123	349	66840	123
130626	627	131243	349	66900	124
130746	628	131363	349	66960	123
130866	628	131483	348	67020	123
130986	628	131603	349	67080	124
131106	628	131723	349	67140	123
131226	628	131843	349	67200	123
131346	629	131963	349	67260	123
131466	629	132083	349	67320	123
131586	629	132203	348	67380	123
131706	630	132323	348	67440	124
131826	629	132443	347	67500	124
131946	629	132563	348	67560	123
132066	629	132683	348	67620	124
132186	629	132803	348	67680	124
132306	630	132923	348	67740	124
132426	630	133043	348	67800	123
132546	630	133163	347	67860	124
132666	629	133283	347	67920	124
132786	630	133403	348	67980	124
132906	630	133523	347	68040	123
133026	631	133643	346	68100	123
133146	630	133763	347	68160	124
133266	631	133883	347	68220	124
133386	631	134003	347	68280	124
133506	631	134123	347	68340	124
133626	632	134243	346	68400	124
133746	631	134363	346	68460	124
133866	632	134483	346	68520	124
133986	632	134603	346	68580	124
134106	632	134723	346	68640	124
134226	632	134843	345	68700	124
134346	632	134963	345	68760	124
134466	632	135083	346	68820	124
134586	632	135203	345	68880	124
134706	612	135323	345	68940	124
134826	627	135443	345	69000	124
134946	626	135563	345	69060	124
135066	626	135683	344	69120	124
135186	626	135803	344	69180	124
135306	626	135923	344	69240	124
135426	625	136043	343	69300	125
135546	625	136163	344	69360	124
135666	625	136283	344	69420	124
135786	625	136403	344	69480	125
135906	624	136523	344	69540	124
136026	626	136643	344	69600	124
136146	626	136763	343	69660	124
136266	626	136883	343	69720	124
136386	627	137003	343	69780	125
136506	627	137123	343	69840	125
136626	626	137243	343	69900	124
136746	627	137363	343	69960	125
136866	629	137483	312	70020	125
136986	628	137603	332	70080	125
137106	628	137723	343	70140	124
137226	629	137843	344	70200	125
137346	628	137963	345	70260	125
137466	630	138083	346	70320	125
137586	629	138203	345	70380	125
137706	629	138323	347	70440	125
137826	630	138443	347	70500	124
137946	630	138563	347	70560	125
138066	630	138683	347	70620	125
138186	630	138803	348	70680	124
138306	631	138923	347	70740	125
138426	630	139043	348	70800	124
138546	630	139163	348	70860	124
138666	631	139283	349	70920	124
138786	631	139403	349	70980	125
138906	631	139523	348	71040	124
139026	631	139643	349	71100	125
139146	630	139763	349	71160	125
139266	632	139883	348	71220	125
139386	632	140003	349	71280	125
139506	632	140123	349	71340	125
139626	632	140243	349	71400	125
139746	632	140363	349	71460	125
139866	632	140483	350	71520	125
139986	632	140603	349	71580	125
140106	633	140723	349	71640	125
140226	633	140843	350	71700	125
140346	633	140963	350	71760	125
140466	633	141083	350	71820	125
140586	633	141203	349	71880	126
140706	634	141323	349	71940	125
140826	634	141443	350	72000	125
140946	632	141563	349	72060	125
141066	633	141683	350	72120	125
141186	634	141803	349	72180	125
141306	634	141923	349	72240	126
141426	634	142043	349	72300	125
141546	632	142163	349	72360	125
141666	635	142283	349	72420	126
141786	635	142403	349	72480	125
141906	635	142523	349	72540	125
142026	635	142643	348	72600	125
142146	634	142763	348	72660	126
142266	633	142883	349	72720	126
142386	635	143003	348	72780	126
142506	635	143123	349	72840	125
142626	635	143243	348	72900	126
142746	636	143363	348	72960	126
142866	635	143483	349	73020	126
142986	636	143603	347	73080	126
143106	635	143723	348	73140	126
143226	637	143843	347	73200	126
143346	635	143963	348	73260	126
143466	637	144083	348	73320	125
143586	637	144203	347	73380	126
143706	635	144323	347	73440	125
143826	636	144443	347	73500	126
143946	637	144563	347	73560	126
144066	636	144683	346	73620	126
144186	637	144803	346	73680	126
144306	635	144923	346	73740	126
144426	638	145043	346	73800	127
144546	638	145163	346	73860	126
144666	637	145283	347	73920	126
144786	637	145403	346	73980	126
144906	638	145523	346	74040	126
145026	639	145643	346	74100	126
145146	639	145763	346	74160	127
145266	639	145883	345	74220	126
145386	639	146003	345	74280	127
145506	639	146123	345	74340	126
145626	639	146243	345	74400	126
145746	640	146363	345	74460	127
145866	640	146483	344	74520	127
145986	639	146603	344	74580	127
146106	640	146723	343	74640	126
146226	640	146843	344	74700	126
146346	640	146963	344	74760	127
146466	640	147083	344	74820	126
146586	640	147203	344	74880	127
146706	640	147323	343	74940	126
146826	640	147443	343	75000	126
146946	641	147563	343	75060	127
147066	640	147683	343	75120	127
147186	640	147803	343	75180	127
147306	641	147923	343	75240	127
147426	641	148043	343	75300	127
147546	641	148163	342	75360	127
147666	642	148283	343	75420	127
147786	642	148403	342	75480	127
147906	642	148523	343	75540	126
148026	642	148643	342	75600	126
148146	642	148763	341	75660	127
148266	641	148883	342	75720	127
148386	642	149003	341	75780	127
148506	641	149123	341	75840	126
148626	642	149243	342	75900	127
148746	643	149363	341	75960	126
148866	643	149483	341	76020	127
148986	642	149603	341	76080	126
149106	642	149723	341	76140	126
149226	642	149843	341	76200	127
149346	642	149963	341	76260	127
149466	640	150083	340	76320	127
149586	640	150203	341	76380	127
149706	643	150323	340	76440	127
149826	643	150443	340	76500	127
149946	642	150563	341	76560	126
150066	643	150683	341	76620	127
150186	643	150803	340	76680	128
150306	643	150923	339	76740	127
150426	642	151043	340	76800	127
150546	642	151163	339	76860	127
150666	642	151283	339	76920	127
150786	642	151403	340	76980	127
150906	643	151523	339	77040	126
151026	643	151643	340	77100	127
151146	640	151763	339	77160	128
151266	643	151883	339	77220	128
151386	642	152003	339	77280	128
151506	643	152123	338	77340	127
151626	643	152243	339	77400	128
151746	643	152363	339	77460	127
151866	642	152483	338	77520	127
151986	642	152603	338	77580	127
152106	643	152723	338	77640	127
152226	643	152843	339	77700	128
152346	643	152963	339	77760	128
152466	644	153083	338	77820	128
152586	643	153203	338	77880	128
152706	643	153323	337	77940	103
152826	643	153443	338	78000	88
152946	643	153563	338	78060	101
153066	644	153683	338	78120	102
153186	644	153803	338	78180	102
153306	644	153923	338	78240	103
153426	644	154043	338	78300	103
153546	644	154163	338	78360	103
153666	643	154283	338	78420	103
153786	644	154403	338	78480	103
153906	644	154523	337	78540	103
154026	643	154643	338	78600	104
154146	644	154763	337	78660	103
154266	643	154883	337	78720	102
154386	644	155003	338	78780	103
154506	644	155123	337	78840	103
154626	642	155243	337	78900	103
154746	644	155363	337	78960	103
154866	642	155483	337	79020	104
154986	643	155603	337	79080	104
155106	644	155723	337	79140	104
155226	644	155843	337	79200	104
155346	644	155963	336	79260	103
155466	644	156083	337	79320	104
155586	644	156203	337	79380	104
155706	643	156323	337	79440	104
155826	644	156443	337	79500	104
155946	642	156563	336	79560	104
156066	642	156683	336	79620	104
156186	643	156803	336	79680	104
156306	646	156923	337	79740	104
156426	643	157043	337	79800	104
156546	645	157163	337	79860	104
156666	644	157283	336	79920	104
156786	645	157403	336	79980	104
156906	643	157523	336	80040	104
157026	645	157643	336	80100	104
157146	645	157763	337	80160	104
157266	646	157883	300	80220	104
157386	646	158003	336	80280	104
157506	643	158123	337	80340	104
157626	645	158243	339	80400	105
157746	645	158363	335	80460	103
157866	645	158483	318	80520	105
157986	644	158603	338	80580	104
158106	645	158723	338	80640	104
158226	644	158843	339	80700	104
158346	642	158963	340	80760	104
158466	645	159083	339	80820	104
158586	645	159203	338	80880	105
158706	645	159323	339	80940	105
158826	645	159443	339	81000	104
158946	644	159563	339	81060	104
159066	645	159683	339	81120	105
159186	644	159803	340	81180	104
159306	644	159923	340	81240	105
159426	644	160043	339	81300	105
159546	643	160163	340	81360	105
159666	645	160283	340	81420	105
159786	644	160403	341	81480	106
159906	646	160523	340	81540	105
160026	642	160643	341	81600	104
160146	644	160763	342	81660	105
160266	645	160883	341	81720	105
160386	645	161003	341	81780	105
160506	646	161123	341	81840	105
160626	644	161243	342	81900	104
160746	645	161363	341	81960	105
160866	645	161483	342	82020	104
160986	645	161603	341	82080	105
161106	645	161723	341	82140	104
161226	645	161843	341	82200	105
161346	645	161963	343	82260	105
161466	645	162083	342	82320	105
161586	642	162203	341	82380	104
161706	645	162323	342	82440	105
161826	644	162443	342	82500	105
161946	645	162563	342	82560	105
162066	645	162683	342	82620	105
162186	645	162803	341	82680	105
162306	645	162923	342	82740	105
162426	644	163043	341	82800	105
162546	645	163163	342	82860	105
162666	644	163283	341	82920	105
162786	645	163403	341	82980	105
162906	645	163523	341	83040	105
163026	645	163643	341	83100	104
163146	644	163763	341	83160	105
163266	644	163883	340	83220	106
163386	645	164003	341	83280	105
163506	645	164123	341	83340	105
163626	641	164243	341	83400	105
163746	644	164363	341	83460	105
163866	645	164483	342	83520	105
163986	644	164603	341	83580	105
164106	645	164723	341	83640	105
164226	645	164843	341	83700	106
164346	645	164963	341	83760	105
164466	644	165083	341	83820	106
164586	644	165203	341	83880	105
164706	644	165323	341	83940	105
164826	643	165443	341	84000	106
164946	644	165563	341	84060	106
165066	643	165683	340	84120	105
165186	641	165803	341	84180	105
165306	639	165923	340	84240	105
165426	645	166043	341	84300	105
165546	643	166163	340	84360	105
165666	644	166283	341	84420	105
165786	644	166403	340	84480	105
165906	642	166523	340	84540	106
166026	642	166616	287	84600	105
166146	644	166736	342	84660	106
166266	643	166856	345	84720	105
166386	638	166976	346	84780	106
166506	643	167096	346	84840	105
166626	645	167216	346	84900	105
166746	643	167336	347	84960	104
166866	644	167456	348	85020	105
166986	644	167576	348	85080	105
167106	644	167696	348	85140	104
167226	643	167816	348	85200	105
167346	643	167936	349	85260	105
167466	643	168056	350	85320	105
167586	644	168176	349	85380	105
167706	644	168296	350	85440	105
167826	643	168416	351	85500	105
167946	643	168536	350	85560	105
168066	644	168656	351	85620	105
168186	642	168776	351	85680	105
168306	643	168896	351	85740	105
168426	644	169016	352	85800	105
168546	641	169136	352	85860	105
168666	643	169256	323	85920	105
168786	642	169376	346	85980	105
168906	640	169496	351	86040	105
169026	641	169616	352	86100	106
169146	643	169736	353	86160	105
169266	640	169856	354	86220	105
169386	643	169976	354	86280	105
169506	642	170096	354	86340	105
169626	641	170216	354	86400	105
169746	643	170336	355	86460	105
169866	640	170456	355	86520	105
169986	643	170576	355	86580	105
170106	640	170696	356	86640	105
170226	643	170816	357	86700	105
170346	644	170936	357	86760	105
170466	639	171056	357	86820	104
170586	639	171176	357	86880	105
170706	639	171296	357	86940	106
170826	639	171416	357	87000	105
170946	639	171536	358	87060	105
171066	638	171656	358	87120	105
171186	638	171776	357	87180	105
171306	638	171896	358	87240	105
171426	615	172016	358	87300	105
171546	634	172136	358	87360	105
171666	633	172256	358	87420	105
171786	637	172376	358	87480	106
171906	634	172496	359	87540	104
172026	631	172616	358	87600	105
172146	631	172736	359	87660	105
172266	635	172856	359	87720	105
172386	636	172976	358	87780	105
172506	634	173096	359	87840	105
172626	632	173216	358	87900	105
172746	632	173336	359	87960	104
172866	631	173456	359	88020	105
172986	632	173576	359	88080	104
173106	631	173696	359	88140	104
173226	631	173816	359	88200	105
173346	635	173936	359	88260	104
173466	635	174056	359	88320	105
173586	631	174176	359	88380	104
173706	635	174296	359	88440	105
173826	636	174416	359	88500	104
173946	635	174536	358	88560	104
174066	636	174656	358	88620	105
174186	632	174776	359	88680	105
174306	632	174896	358	88740	105
174426	631	175016	357	88800	105
174546	633	175136	357	88860	105
174666	636	175256	357	88920	105
174786	633	175376	357	88980	105
174906	634	175496	356	89040	76
175026	634	175616	356	89100	74
175146	632	175736	356	89160	103
175266	635	175856	355	89220	104
175386	636	175976	355	89280	104
175506	636	176096	355	89340	105
175626	635	176216	355	89400	106
175746	613	176336	358	89460	106
175866	630	176456	331	89520	105
175986	629	176576	317	89580	106
176106	629	176696	352	89640	106
176226	626	176816	355	89700	106
176346	624	176936	354	89760	106
176466	628	177056	351	89820	106
176586	624	177176	351	89880	107
176706	625	177296	350	89940	106
176826	625	177416	350	90000	107
176946	624	177536	350	90060	107
177066	626	177656	349	90120	106
177186	627	177776	350	90180	107
177306	624	177896	348	90240	107
177426	625	178016	349	90300	106
177546	625	178136	349	90360	107
177666	624	178256	349	90420	107
177786	627	178376	348	90480	107
177906	628	178496	348	90540	107
178026	628	178616	347	90600	107
178146	625	178736	346	90660	107
178266	624	178856	350	90720	107
178386	627	178976	348	90780	107
178506	625	179096	347	90840	107
178626	625	179216	347	90900	108
178746	625	179336	347	90960	107
178866	625	179456	347	91020	108
178986	629	179576	347	91080	108
179106	629	179696	346	91140	107
179226	628	179816	346	91200	108
179346	629	179936	345	91260	106
179466	626	180056	346	91320	108
179586	628	180176	345	91380	109
179706	625	180296	345	91440	107
179826	624	180416	343	91500	107
179946	625	180536	343	91560	108
180066	605	180656	343	91620	108
180186	624	180776	342	91680	108
180306	621	180896	342	91740	108
180426	623	181016	342	91800	108
180546	624	181136	342	91860	108
180666	624	181256	342	91920	108
180786	623	181376	341	91980	108
180906	623	181496	341	92040	108
181026	623	181616	340	92100	107
181146	624	181736	341	92160	108
181266	624	181856	340	92220	108
181386	624	181976	339	92280	108
181506	622	182096	339	92340	108
181626	624	182216	339	92400	108
181746	620	182336	339	92460	108
181866	624	182456	338	92520	108
181986	620	182576	338	92580	108
182106	624	182696	338	92640	109
182226	625	182816	338	92700	109
182346	624	182936	337	92760	109
182466	624	183056	336	92820	109
182586	622	183176	337	92880	108
182706	625	183296	336	92940	108
182826	624	183416	336	93000	108
182946	626	183536	336	93060	108
183066	603	183656	335	93120	107
183186	623	183776	335	93180	109
183306	622	183896	336	93240	109
183426	619	184016	335	93300	108
183546	622	184136	334	93360	109
183666	620	184256	335	93420	108
183786	621	184376	334	93480	109
183906	622	184496	335	93540	109
184026	620	184616	301	93600	109
184146	622	184736	333	93660	108
184266	618	184856	336	93720	108
184386	619	184976	338	93780	109
184506	623	185096	339	93840	108
184626	619	185216	339	93900	109
184746	622	185336	340	93960	108
184866	619	185456	340	94020	109
184986	621	185576	340	94080	108
185106	619	185696	340	94140	108
185226	623	185816	340	94200	109
185346	624	185936	340	94260	109
185466	625	186056	341	94320	108
185586	622	186176	341	94380	109
185706	625	186296	342	94440	108
185826	624	186416	341	94500	109
185946	626	186536	342	94560	108
186066	623	186656	342	94620	108
186186	623	186776	342	94680	109
186306	623	186896	341	94740	109
186426	623	187016	342	94800	108
186546	626	187136	343	94860	108
186666	627	187256	342	94920	109
186786	625	187376	343	94980	109
186906	628	187496	343	95040	109
187026	624	187616	343	95100	108
187146	624	187736	343	95160	109
187266	625	187856	342	95220	108
187386	627	187976	342	95280	109
187506	627	188096	343	95340	109
187626	628	188216	343	95400	109
187746	627	188336	343	95460	109
187866	626	188456	343	95520	109
187986	625	188576	342	95580	108
188106	629	188696	343	95640	109
188226	626	188816	343	95700	109
188346	628	188936	342	95760	109
188466	625	189056	343	95820	109
188586	625	189176	342	95880	109
188706	629	189296	343	95940	109
188826	628	189416	342	96000	110
188946	626	189536	343	96060	108
189066	631	189656	343	96120	109
189186	629	189776	342	96180	109
189306	631	189896	343	96240	109
189426	632	190016	342	96300	109
189546	631	190136	342	96360	109
189666	629	190256	342	96420	109
189786	628	190376	342	96480	109
189906	627	190496	341	96540	108
190026	629	190616	342	96600	109
190146	629	190736	342	96660	110
190266	629	190856	342	96720	109
190386	629	190976	341	96780	109
190506	631	191096	341	96840	109
190626	630	191216	341	96900	109
190746	632	191336	341	96960	109
190866	629	191456	341	97020	109
190986	632	191576	340	97080	109
191106	630	191696	341	97140	109
191226	630	191816	341	97200	109
191346	629	191936	341	97260	108
191466	631	192056	340	97320	109
191586	634	192176	341	97380	109
191706	629	192296	340	97440	110
191826	632	192416	340	97500	110
191946	633	192536	340	97560	109
192066	633	192656	338	97620	109
192186	630	192776	340	97680	110
192306	630	192896	340	97740	109
192426	629	193016	339	97800	109
192546	632	193136	339	97860	109
192666	632	193256	339	97920	109
192786	631	193376	339	97980	109
192906	634	193496	339	98040	108
193026	634	193616	338	98100	109
193146	632	193736	338	98160	109
193266	631	193856	337	98220	109
193386	631	193976	338	98280	109
193506	631	194096	338	98340	108
193626	631	194216	337	98400	109
193746	631	194336	337	98460	109
193866	631	194456	337	98520	109
193986	631	194576	336	98580	108
194106	633	194696	336	98640	109
194226	634	194816	336	98700	109
194346	632	194936	336	98760	108
194466	602	195056	335	98820	109
194586	627	195176	336	98880	109
194706	627	195296	336	98940	109
194826	632	195416	334	99000	109
194946	628	195536	336	99060	109
195066	626	195656	335	99120	108
195186	629	195776	334	99180	109
195306	628	195896	334	99240	109
195426	630	196016	334	99300	109
195546	631	196136	335	99360	110
195666	628	196256	333	99420	109
195786	630	196376	333	99480	109
195906	631	196496	333	99540	110
196026	631	196616	333	99600	109
196146	629	196736	333	99660	109
196266	628	196856	331	99720	109
196386	632	196976	332	99780	109
196506	626	197096	333	99840	109
196626	631	197216	332	99900	109
196746	631	197336	331	99960	109
196866	632	197456	332	100020	109
196986	630	197576	332	100080	108
197106	629	197696	332	100140	109
197226	632	197816	330	100200	109
197346	628	197936	331	100260	109
197466	633	198056	331	100320	109
197586	633	198176	331	100380	109
197706	628	198296	330	100440	109
197826	629	198416	330	100500	109
197946	630	198536	330	100560	109
198066	633	198656	330	100620	109
198186	634	198776	330	100680	109
198306	630	198896	329	100740	109
198426	632	199016	329	100800	109
198546	633	199136	329	100860	109
198666	631	199256	329	100920	109
198786	630	199376	329	100980	109
198906	631	199496	329	101040	109
199026	631	199616	330	101100	109
199146	634	199736	328	101160	108
199266	630	199856	329	101220	109
199386	631	199976	328	101280	108
199506	636	200096	328	101340	109
199626	629	200216	328	101400	109
199746	635	200336	328	101460	108
199866	601	200456	327	101520	109
199986	630	200576	328	101580	109
200106	626	200696	328	101640	109
200226	623	200816	327	101700	108
200346	627	200936	327	101760	108
200466	626	201056	326	101820	109
200586	630	201176	327	101880	109
200706	625	201296	326	101940	108
200826	627	201416	326	102000	109
200946	625	201536	326	102060	108
201066	624	201656	326	102120	108
201186	627	201776	325	102180	108
201306	629	201896	326	102240	109
201426	626	202016	324	102300	109
201546	626	202136	326	102360	109
201666	627	202256	326	102420	108
201786	631	202376	325	102480	108
201906	631	202496	325	102540	108
202026	630	202616	325	102600	108
202146	628	202736	325	102660	109
202266	627	202856	324	102720	109
202386	633	202976	325	102780	108
202506	628	203096	325	102840	108
202626	627	203216	324	102900	108
202746	627	203336	324	102960	109
202866	628	203456	323	103020	109
202986	625	203576	324	103080	109
203106	629	203696	323	103140	108
203226	630	203816	324	103200	109
203346	630	203936	323	103260	108
203466	629	204056	323	103320	109
203586	629	204176	323	103380	108
203706	628	204296	323	103440	109
203826	632	204416	322	103500	109
203946	604	204536	322	103560	108
204066	625	204656	322	103620	108
204186	631	204776	323	103680	108
204306	627	204896	321	103740	108
204426	625	205016	322	103800	107
204546	623	205136	321	103860	108
204666	624	205256	321	103920	108
204786	625	205376	321	103980	108
204906	624	205496	321	104040	107
205026	626	205616	320	104100	108
205146	628	205736	321	104160	108
205266	624	205856	321	104220	108
205386	629	205976	321	104280	108
205506	625	206096	321	104340	107
205626	625	206216	320	104400	108
205746	626	206336	321	104460	108
205866	627	206456	320	104520	107
205986	628	206576	321	104580	107
206106	630	206696	320	104640	108
206226	629	206816	320	104700	108
206346	628	206936	320	104760	109
206466	626	207056	320	104820	108
206586	630	207176	319	104880	108
206706	626	207296	320	104940	108
206826	627	207416	319	105000	108
206946	626	207536	319	105060	108
207066	630	207656	319	105120	107
207186	626	207776	319	105180	108
207306	627	207896	318	105240	108
207426	628	208016	319	105300	108
207546	628	208136	318	105360	108
207666	629	208256	319	105420	108
207786	629	208376	319	105480	108
207906	627	208496	319	105540	108
208026	633	208616	319	105600	108
208146	631	208736	318	105660	108
208266	631	208856	319	105720	108
208386	630	208976	319	105780	107
208506	628	209096	318	105840	108
208626	629	209216	318	105900	108
208746	630	209336	318	105960	108
208866	628	209456	318	106020	107
208986	630	209576	318	106080	108
209106	630	209696	317	106140	108
209226	635	209816	318	106200	109
209346	631	209936	318	106260	108
209466	632	210056	318	106320	109
209586	632	210176	317	106380	108
209706	634	210296	318	106440	108
209826	631	210416	317	106500	108
209946	632	210536	317	106560	108
210066	599	210656	317	106620	108
210186	625	210776	317	106680	109
210306	627	210896	317	106740	108
210426	626	211016	317	106800	109
210546	625	211136	316	106860	108
210666	630	211256	316	106920	108
210786	624	211376	316	106980	108
210906	625	211496	316	107040	108
211026	622	211616	316	107100	108
211146	625	211736	317	107160	108
211266	626	211856	316	107220	107
211386	629	211976	316	107280	108
211506	624	212096	316	107340	107
211626	627	212216	316	107400	108
211746	628	212336	316	107460	108
211866	628	212456	316	107520	108
211986	625	212576	316	107580	108
212106	625	212696	315	107640	108
212226	625	212816	315	107700	108
212346	623	212936	316	107760	107
212466	626	213056	315	107820	108
212586	627	213176	315	107880	108
212706	629	213296	315	107940	108
212826	626	213416	315	108000	108
212946	626	213536	316	108060	108
213066	625	213656	315	108120	108
213186	627	213776	315	108180	108
213306	628	213896	314	108240	108
213426	629	214016	315	108300	108
213546	631	214136	314	108360	108
213666	629	214256	314	108420	108
213786	629	214376	314	108480	107
213906	630	214496	314	108540	108
214026	628	214616	315	108600	108
214146	629	214736	313	108660	108
214266	630	214856	314	108720	108
214386	629	214976	313	108780	108
214506	627	215096	313	108840	107
214626	631	215216	314	108900	107
214746	629	215336	313	108960	108
214866	629	215456	313	109020	108
214986	628	215576	313	109080	108
215106	629	215696	313	109140	107
215226	631	215816	312	109200	108
215346	631	215936	312	109260	107
215466	630	216056	312	109320	107
215586	632	216176	312	109380	107
215706	631	216296	313	109440	108
215826	630	216416	311	109500	108
215946	632	216536	312	109560	108
216066	632	216656	312	109620	108
216186	630	216776	312	109680	108
216306	632	216896	312	109740	108
216426	630	217016	312	109800	108
216546	633	217136	312	109860	108
216666	630	217256	312	109920	108
216786	630	217376	311	109980	108
216906	629	217496	311	110040	107
217026	632	217616	311	110100	108
217146	635	217736	312	110160	108
217266	633	217856	312	110220	107
217386	631	217976	312	110280	108
217506	633	218096	311	110340	107
217626	633	218216	310	110400	107
217746	632	218336	312	110460	108
217866	632	218456	311	110520	108
217986	634	218576	311	110580	108
218106	633	218696	310	110640	107
218226	633	218816	311	110700	108
218346	632	218936	311	110760	108
218466	633	219056	311	110820	107
218586	634	219176	310	110880	108
218706	630	219296	311	110940	107
218826	634	219416	311	111000	108
218946	634	219536	311	111060	108
219066	635	219656	310	111120	107
219186	632	219776	310	111180	107
219306	633	219896	311	111240	108
219426	633	220016	310	111300	107
219546	632	220136	310	111360	107
219666	632	220256	310	111420	107
219786	633	220376	310	111480	107
219906	632	220496	310	111540	108
220026	634	220616	310	111600	107
220146	632	220736	309	111660	108
220266	633	220856	309	111720	107
220386	634	220976	309	111780	108
220506	633	221096	310	111840	107
220626	633	221216	308	111900	108
220746	633	221336	277	111960	108
220866	591	221456	309	112020	108
220986	627	221576	313	112080	107
221106	628	221696	313	112140	107
221226	628	221816	313	112200	107
221346	627	221936	313	112260	108
221466	630	222056	315	112320	107
221586	629	222176	315	112380	108
221706	628	222296	316	112440	108
221826	627	222416	316	112500	109
221946	629	222536	316	112560	108
222066	630	222656	317	112620	108
222186	626	222776	317	112680	107
222306	626	222896	317	112740	108
222426	631	223016	316	112800	108
222546	626	223136	317	112860	107
222666	627	223256	318	112920	107
222786	632	223376	318	112980	107
222906	627	223496	318	113040	107
223026	628	223616	317	113100	108
223146	629	223736	318	113160	108
223266	627	223856	319	113220	108
223386	627	223976	318	113280	107
223506	627	224096	318	113340	108
223626	627	224216	318	113400	108
223746	632	224336	319	113460	107
223866	631	224456	318	113520	107
223986	627	224576	319	113580	107
224106	631	224696	319	113640	107
224226	629	224816	318	113700	107
224346	630	224936	319	113760	107
224466	631	225056	319	113820	107
224586	630	225176	319	113880	107
224706	631	225296	319	113940	107
224826	630	225416	319	114000	107
224946	630	225536	319	114060	107
225066	631	225656	320	114120	107
225186	630	225776	319	114180	107
225306	632	225896	319	114240	107
225426	630	226016	320	114300	106
225546	632	226136	319	114360	107
225666	630	226256	319	114420	107
225786	631	226376	318	114480	106
225906	630	226496	320	114540	107
226026	632	226616	320	114600	107
226146	631	226736	320	114660	107
226266	631	226856	320	114720	107
226386	630	226976	319	114780	107
226506	631	227096	319	114840	107
226626	633	227216	320	114900	107
226746	629	227336	319	114960	107
226866	631	227456	320	115020	107
226986	628	227576	320	115080	107
227106	630	227696	319	115140	106
227226	630	227816	320	115200	107
227346	632	227936	320	115260	107
227466	632	228056	321	115320	107
227586	631	228176	321	115380	107
227706	632	228296	320	115440	107
227826	630	228416	321	115500	107
227946	629	228536	321	115560	107
228066	631	228656	321	115620	107
228186	632	228776	321	115680	106
228306	633	228896	321	115740	106
228426	632	229016	321	115800	107
228546	631	229136	321	115860	106
228666	634	229256	320	115920	107
228786	631	229376	320	115980	107
228906	625	229496	321	116040	107
229026	628	229616	321	116100	107
229146	632	229736	321	116160	107
229266	630	229856	320	116220	107
229386	629	229976	321	116280	107
229506	631	230096	321	116340	106
229626	632	230216	321	116400	106
229746	633	230336	321	116460	106
229866	628	230456	321	116520	106
229986	631	230576	322	116580	106
230106	632	230696	322	116640	106
230226	631	230816	321	116700	106
230346	632	230936	321	116760	106
230466	632	231056	322	116820	106
230586	630	231176	321	116880	107
230706	631	231296	321	116940	106
230826	632	231416	321	117000	105
230946	631	231536	321	117060	106
231066	633	231656	321	117120	107
231186	634	231776	321	117180	106
231306	634	231896	321	117240	107
231426	635	232016	321	117300	106
231546	632	232136	321	117360	106
231666	632	232256	321	117420	106
231786	633	232376	321	117480	106
231906	631	232496	321	117540	106
232026	630	232616	322	117600	106
232146	632	232736	321	117660	106
232266	632	232856	321	117720	106
232386	632	232976	322	117780	106
232506	632	233096	321	117840	106
232626	633	233216	321	117900	106
232746	633	233336	321	117960	106
232866	630	233456	321	118020	106
232986	631	233576	322	118080	106
233106	631	233696	321	118140	105
233226	632	233816	322	118200	106
233346	632	233936	317	118260	105
233466	633	234056	323	118320	105
233586	633	234176	325	118380	105
233706	632	234296	326	118440	105
233826	632	234416	326	118500	105
233946	632	234536	326	118560	105
234066	633	234656	326	118620	105
234186	632	234776	327	118680	105
234306	633	234896	327	118740	105
234426	632	235016	328	118800	105
234546	634	235136	328	118860	105
234666	631	235256	328	118920	105
234786	631	235376	328	118980	105
234906	631	235496	329	119040	105
235026	630	235616	329	119100	105
235146	632	235736	329	119160	104
235266	631	235856	330	119220	105
235386	630	235976	330	119280	105
235506	629	236096	330	119340	105
235626	630	236216	330	119400	105
235746	630	236336	331	119460	106
235866	632	236456	331	119520	105
235986	633	236576	331	119580	105
236106	631	236696	332	119640	106
236226	632	236816	332	119700	105
236346	632	236936	332	119760	105
236466	630	237056	332	119820	105
236586	630	237176	332	119880	105
[truncated: 14,775 more rows]
