# Supplementary material for: Interaction of Cleat-Matrix on Coal Permeability from Experimental Observations and Numerical Analysis
Source: Hindawi journal article supplement (doi:10.1155/2019/7474587), 2019-11-18
Supplement: f1 [file 7474587.f1.zip › 7474587.f1.xlsx/Fig.5.xlsx]

## Sheet: 5(a)
Time	upstream pressure(5MPa Pore pressure)	downstream pressure	Time	upstream pressure(4MPa)	downstream pressure	Time	upstream pressure(3MPa)	downstream pressure
0	0	0	0	0	0.001	0	0.01	-0.001
30	0.41	0	31	0.3	0	10	0.01	-0.002
60	1.002	0	61	0.565	0.001	20	0.02	-0.001
90	1.563	0.001	91	0.98	0	30	0.118	-0.002
120	2.1	0.001	121	1.506	0	40	0.217	-0.001
150	2.583	0.001	151	2.146	0	50	0.316	-0.001
180	3.015	0.001	181	2.748	0.002	60	0.412	-0.002
210	3.396	0.004	211	3.214	0.004	70	0.505	-0.001
240	3.72	0.009	241	3.547	0.011	80	0.601	-0.001
270	3.982	0.017	271	3.769	0.022	90	0.695	-0.001
300	4.2	0.027	301	3.914	0.034	100	0.788	-0.001
330	4.37	0.039	331	4.006	0.05	110	0.88	-0.001
360	4.507	0.053	361	4.065	0.068	120	0.971	-0.001
390	4.611	0.069	391	4.101	0.085	130	1.06	-0.001
420	4.693	0.086	421	4.126	0.104	140	1.147	0
450	4.755	0.104	451	4.139	0.124	150	1.227	-0.001
480	4.802	0.124	481	4.15	0.144	160	1.311	-0.001
510	4.836	0.145	511	4.157	0.164	170	1.391	0
540	4.864	0.165	541	4.161	0.184	180	1.469	0
570	4.884	0.186	571	4.164	0.205	190	1.543	0
600	4.9	0.208	601	4.167	0.226	200	1.617	0
630	4.912	0.231	631	4.168	0.247	210	1.688	0
660	4.922	0.253	661	4.17	0.268	220	1.756	0.001
690	4.929	0.276	691	4.171	0.289	230	1.823	0.002
720	4.934	0.298	721	4.172	0.311	240	1.885	0.002
750	4.957	0.321	751	4.173	0.333	250	1.949	0.003
780	5.019	0.343	781	4.174	0.354	260	2.005	0.003
810	5.046	0.367	811	4.175	0.376	270	2.063	0.004
840	5.092	0.391	841	4.175	0.398	280	2.118	0.005
870	5.115	0.415	871	4.176	0.42	290	2.17	0.005
900	5.145	0.442	901	4.177	0.442	300	2.221	0.007
930	5.146	0.468	931	4.177	0.466	310	2.268	0.008
960	5.146	0.494	961	4.178	0.488	320	2.314	0.01
986	5.148	0.517	991	4.178	0.511	330	2.356	0.011
1046	5.148	0.57	1021	4.18	0.533	340	2.396	0.013
1106	5.148	0.624	1051	4.18	0.556	350	2.436	0.014
1166	5.148	0.678	1081	4.179	0.578	360	2.473	0.016
1226	5.148	0.732	1111	4.181	0.601	370	2.506	0.018
1286	5.148	0.786	1141	4.181	0.624	380	2.542	0.02
1346	5.149	0.839	1171	4.182	0.648	390	2.572	0.022
1406	5.148	0.892	1201	4.182	0.67	400	2.602	0.024
1466	5.148	0.945	1231	4.183	0.694	410	2.632	0.026
1526	5.149	0.999	1261	4.184	0.717	420	2.659	0.029
1586	5.149	1.054	1291	4.183	0.74	430	2.683	0.031
1646	5.15	1.106	1321	4.184	0.764	440	2.706	0.033
1706	5.15	1.159	1351	4.185	0.787	450	2.729	0.035
1766	5.151	1.212	1381	4.185	0.809	460	2.751	0.038
1826	5.151	1.265	1411	4.186	0.833	470	2.771	0.041
1886	5.152	1.318	1441	4.186	0.856	480	2.79	0.043
1946	5.153	1.372	1471	4.186	0.879	490	2.814	0.046
2006	5.152	1.423	1501	4.188	0.903	500	2.836	0.048
2066	5.153	1.475	1531	4.188	0.927	510	2.86	0.051
2126	5.153	1.528	1561	4.189	0.949	520	2.879	0.054
2186	5.154	1.58	1591	4.188	0.973	530	2.898	0.057
2246	5.154	1.632	1621	4.189	0.997	540	2.916	0.06
2306	5.155	1.684	1651	4.19	1.019	550	2.932	0.064
2366	5.155	1.735	1681	4.191	1.043	560	2.945	0.067
2426	5.156	1.786	1711	4.191	1.066	570	2.96	0.07
2486	5.156	1.836	1741	4.191	1.089	580	2.973	0.074
2546	5.157	1.886	1771	4.192	1.113	590	2.984	0.077
2606	5.157	1.936	1801	4.192	1.135	600	2.994	0.08
2666	5.158	1.987	1831	4.193	1.16	610	3.005	0.083
2726	5.158	2.036	1861	4.193	1.182	620	3.013	0.087
2786	5.158	2.085	1891	4.194	1.205	630	3.022	0.091
2846	5.16	2.134	1921	4.195	1.228	640	3.029	0.094
2906	5.16	2.182	1951	4.195	1.251	650	3.036	0.098
2966	5.16	2.231	1981	4.195	1.274	660	3.043	0.101
3026	5.16	2.278	2011	4.196	1.297	670	3.048	0.105
3086	5.161	2.326	2041	4.197	1.321	680	3.053	0.109
3146	5.161	2.372	2071	4.197	1.345	690	3.058	0.113
3206	5.161	2.42	2101	4.198	1.366	700	3.063	0.117
3266	5.162	2.466	2131	4.198	1.39	710	3.067	0.12
3326	5.162	2.512	2161	4.198	1.412	720	3.07	0.124
3386	5.162	2.557	2191	4.198	1.435	730	3.074	0.128
3446	5.163	2.602	2221	4.2	1.457	740	3.077	0.132
3506	5.163	2.647	2251	4.201	1.48	750	3.08	0.136
3566	5.163	2.691	2281	4.201	1.504	760	3.082	0.14
3626	5.163	2.734	2311	4.201	1.526	770	3.085	0.144
3686	5.163	2.779	2341	4.202	1.549	780	3.087	0.149
3746	5.164	2.822	2371	4.203	1.57	790	3.09	0.152
3806	5.164	2.864	2401	4.203	1.594	800	3.092	0.156
3866	5.163	2.906	2431	4.204	1.616	810	3.094	0.16
3926	5.164	2.948	2461	4.204	1.639	820	3.097	0.164
3986	5.164	2.989	2491	4.204	1.66	830	3.098	0.168
4046	5.164	3.03	2521	4.204	1.682	840	3.099	0.172
4106	5.164	3.07	2551	4.206	1.704	850	3.1	0.176
4166	5.164	3.11	2581	4.207	1.726	855	3.101	0.179
4226	5.164	3.149	2611	4.207	1.748	886	3.105	0.191
4286	5.165	3.188	2641	4.208	1.771	916	3.238	0.203
4346	5.164	3.226	2671	4.208	1.792	946	3.241	0.216
4406	5.165	3.264	2701	4.209	1.813	976	3.241	0.23
4466	5.164	3.301	2731	4.21	1.835	1006	3.242	0.243
4526	5.165	3.338	2761	4.21	1.856	1036	3.244	0.257
4586	5.165	3.375	2791	4.21	1.878	1066	3.244	0.272
4646	5.165	3.411	2821	4.211	1.9	1096	3.245	0.286
4706	5.166	3.445	2851	4.212	1.921	1126	3.247	0.301
4766	5.165	3.48	2881	4.213	1.942	1156	3.247	0.315
4826	5.166	3.514	2911	4.213	1.963	1186	3.248	0.33
4886	5.166	3.549	2941	4.215	1.984	1216	3.249	0.344
4946	5.166	3.582	2971	4.215	2.004	1246	3.25	0.359
5006	5.166	3.616	3001	4.215	2.025	1276	3.251	0.374
5066	5.166	3.648	3031	4.216	2.045	1306	3.251	0.388
5126	5.166	3.68	3061	4.217	2.066	1336	3.252	0.403
5186	5.166	3.711	3091	4.217	2.086	1366	3.253	0.419
5246	5.167	3.742	3121	4.217	2.107	1396	3.253	0.433
5306	5.166	3.773	3151	4.318	2.125	1426	3.254	0.448
5366	5.167	3.802	3181	4.318	2.143	1456	3.256	0.463
5426	5.167	3.832	3211	4.318	2.167	1486	3.256	0.478
5486	5.167	3.862	3231	4.319	2.181	1516	3.256	0.494
5546	5.166	3.89	3242	4.319	2.19	1546	3.257	0.509
5606	5.168	3.918	3303	4.32	2.233	1576	3.258	0.524
5666	5.168	3.946	3363	4.32	2.273	1606	3.258	0.539
5726	5.168	3.973	3423	4.32	2.313	1636	3.259	0.554
5786	5.168	4	3483	4.32	2.353	1666	3.26	0.57
5846	5.168	4.026	3543	4.321	2.391	1696	3.26	0.585
5906	5.168	4.051	3603	4.321	2.429	1726	3.261	0.6
5966	5.169	4.077	3663	4.322	2.467	1756	3.262	0.616
6026	5.169	4.101	3723	4.322	2.504	1786	3.262	0.631
6086	5.169	4.126	3783	4.322	2.541	1816	3.262	0.647
6146	5.169	4.15	3843	4.324	2.577	1846	3.263	0.662
6206	5.169	4.174	3903	4.324	2.612	1876	3.264	0.678
6266	5.169	4.196	3963	4.324	2.647	1906	3.265	0.694
6326	5.169	4.219	4023	4.325	2.681	1936	3.265	0.71
6386	5.169	4.242	4083	4.324	2.715	1966	3.266	0.725
6446	5.169	4.264	4143	4.325	2.748	1996	3.266	0.741
6506	5.17	4.285	4203	4.325	2.781	2026	3.265	0.756
6566	5.169	4.306	4263	4.325	2.813	2056	3.267	0.772
6626	5.17	4.326	4323	4.326	2.845	2086	3.268	0.788
6686	5.169	4.346	4383	4.326	2.876	2116	3.268	0.803
6746	5.17	4.366	4443	4.326	2.907	2146	3.269	0.818
6806	5.17	4.385	4503	4.327	2.937	2176	3.27	0.835
6866	5.17	4.404	4563	4.327	2.966	2206	3.269	0.85
6926	5.17	4.423	4623	4.328	2.996	2236	3.27	0.866
6986	5.17	4.441	4683	4.329	3.024	2266	3.271	0.881
7046	5.17	4.459	4743	4.328	3.052	2296	3.271	0.896
7106	5.169	4.476	4803	4.329	3.08	2326	3.271	0.912
7166	5.17	4.493	4863	4.33	3.107	2356	3.272	0.929
7226	5.172	4.51	4923	4.33	3.134	2386	3.272	0.944
7286	5.171	4.526	4983	4.33	3.16	2416	3.272	0.959
7346	5.171	4.542	5043	4.328	3.185	2446	3.272	0.974
7406	5.172	4.557	5103	4.329	3.211	2476	3.273	0.99
7466	5.171	4.572	5163	4.328	3.235	2506	3.274	1.006
7526	5.172	4.587	5223	4.328	3.258	2536	3.274	1.022
7586	5.171	4.602	5283	4.328	3.283	2566	3.274	1.037
7646	5.171	4.615	5343	4.327	3.305	2596	3.276	1.052
7706	5.171	4.63	5403	4.327	3.328	2626	3.275	1.067
7766	5.172	4.643	5463	4.326	3.35	2656	3.276	1.083
7826	5.17	4.657	5523	4.326	3.371	2686	3.276	1.099
7886	5.17	4.669	5583	4.327	3.392	2716	3.277	1.113
7946	5.171	4.682	5643	4.326	3.413	2746	3.277	1.129
8006	5.172	4.694	5703	4.326	3.433	2776	3.276	1.144
8066	5.171	4.706	5763	4.325	3.453	2806	3.277	1.159
8126	5.171	4.717	5823	4.325	3.472	2836	3.278	1.175
8186	5.171	4.729	5883	4.324	3.492	2866	3.278	1.19
8246	5.171	4.74	5943	4.324	3.511	2896	3.279	1.205
8306	5.172	4.75	6003	4.324	3.529	2926	3.28	1.22
8366	5.172	4.762	6063	4.324	3.545	2956	3.28	1.235
8426	5.172	4.771	6123	4.324	3.563	2986	3.28	1.249
8486	5.171	4.781	6183	4.324	3.58	3016	3.28	1.265
8546	5.172	4.792	6243	4.324	3.597	3046	3.281	1.279
8606	5.172	4.801	6303	4.323	3.613	3076	3.281	1.294
8666	5.172	4.81	6363	4.322	3.629	3106	3.281	1.309
8726	5.173	4.82	6423	4.324	3.644	3136	3.281	1.324
8786	5.173	4.828	6483	4.322	3.66	3166	3.282	1.338
8846	5.174	4.837	6543	4.322	3.675	3196	3.282	1.353
8906	5.174	4.845	6603	4.322	3.69	3226	3.282	1.368
8966	5.175	4.854	6663	4.322	3.703	3256	3.282	1.382
9026	5.176	4.862	6723	4.322	3.718	3286	3.283	1.397
9086	5.176	4.87	6783	4.321	3.731	3316	3.283	1.411
9146	5.176	4.878	6843	4.321	3.744	3346	3.283	1.426
9206	5.176	4.885	6903	4.321	3.757	3376	3.284	1.44
9266	5.177	4.892	6963	4.321	3.771	3406	3.284	1.454
9326	5.176	4.899	7023	4.321	3.781	3436	3.284	1.468
9386	5.177	4.906	7083	4.321	3.794	3466	3.285	1.482
9446	5.178	4.913	7143	4.321	3.806	3496	3.285	1.497
9506	5.178	4.92	7203	4.321	3.817	3526	3.285	1.511
9566	5.178	4.927	7263	4.32	3.829	3556	3.285	1.525
9626	5.178	4.933	7323	4.32	3.839	3586	3.285	1.539
9686	5.178	4.939	7383	4.32	3.85	3616	3.286	1.553
9746	5.18	4.946	7443	4.32	3.861	3646	3.286	1.567
9806	5.179	4.951	7503	4.32	3.871	3676	3.286	1.58
9866	5.18	4.957	7563	4.319	3.88	3706	3.286	1.594
9926	5.179	4.963	7623	4.32	3.89	3736	3.286	1.608
9986	5.178	4.968	7683	4.318	3.899	3766	3.286	1.622
10046	5.178	4.973	7743	4.319	3.909	3796	3.286	1.635
10106	5.179	4.978	7803	4.318	3.918	3826	3.286	1.649
10166	5.179	4.983	7863	4.319	3.927	3856	3.286	1.662
10226	5.179	4.988	7923	4.318	3.936	3886	3.285	1.675
10286	5.178	4.992	7983	4.319	3.943	3916	3.285	1.689
10346	5.179	4.997	8043	4.318	3.951	3946	3.285	1.701
10406	5.178	5.001	8103	4.319	3.959	3976	3.284	1.715
10466	5.178	5.005	8163	4.318	3.967	4006	3.285	1.727
10526	5.178	5.01	8223	4.318	3.975	4036	3.284	1.741
10586	5.178	5.014	8283	4.318	3.982	4066	3.284	1.754
10646	5.179	5.017	8343	4.318	3.989	4096	3.284	1.766
10706	5.178	5.022	8403	4.318	3.996	4126	3.284	1.779
10766	5.178	5.025	8463	4.318	4.003	4156	3.283	1.792
10826	5.178	5.028	8523	4.317	4.01	4188	3.283	1.805
10886	5.178	5.032	8583	4.318	4.017	4249	3.283	1.826
10946	5.178	5.035	8643	4.318	4.023	4309	3.283	1.847
11006	5.178	5.039	8703	4.318	4.03	4369	3.282	1.875
11066	5.178	5.041	8763	4.318	4.035	4429	3.281	1.904
11126	5.178	5.044	8823	4.318	4.041	4489	3.281	1.928
11186	5.178	5.048	8883	4.318	4.047	4549	3.281	1.953
11246	5.178	5.051	8943	4.318	4.052	4609	3.281	1.977
11306	5.178	5.054	9003	4.318	4.058	4669	3.28	2
11366	5.178	5.057	9063	4.317	4.063	4729	3.28	2.023
11426	5.178	5.059	9123	4.317	4.069	4789	3.28	2.045
11486	5.178	5.062	9183	4.317	4.074	4849	3.28	2.067
11546	5.178	5.065	9243	4.317	4.079	4909	3.28	2.089
11606	5.178	5.067	9303	4.317	4.084	4969	3.279	2.11
11666	5.178	5.069	9363	4.317	4.089	5029	3.28	2.131
11726	5.178	5.072	9423	4.316	4.093	5089	3.279	2.152
11786	5.178	5.074	9483	4.317	4.098	5149	3.28	2.172
11846	5.178	5.076	9543	4.317	4.102	5209	3.278	2.192
11906	5.178	5.079	9603	4.316	4.106	5269	3.278	2.212
11966	5.178	5.08	9663	4.317	4.111	5329	3.278	2.231
12026	5.178	5.083	9723	4.317	4.115	5389	3.278	2.251
12086	5.178	5.085	9783	4.316	4.119	5449	3.277	2.269
12146	5.178	5.086	9865	4.316	4.124	5509	3.277	2.288
12206	5.178	5.088	9925	4.316	4.128	5569	3.277	2.306
12266	5.178	5.089	9985	4.316	4.132	5629	3.277	2.323
12326	5.178	5.091	10045	4.316	4.135	5689	3.277	2.34
12386	5.178	4.929	10105	4.316	4.139	5749	3.276	2.358
12446	5.177	4.939	10165	4.316	4.142	5809	3.276	2.375
12506	5.178	4.947	10225	4.316	4.146	5869	3.276	2.392
12566	5.177	4.951	10285	4.316	4.149	5929	3.276	2.408
12626	5.178	4.957	10345	4.316	4.152	5989	3.276	2.425
12686	5.178	4.964	10405	4.316	4.156	6049	3.276	2.44
12746	5.177	4.97	10465	4.316	4.158	6109	3.274	2.456
12806	5.177	4.976	10525	4.316	4.161	6169	3.275	2.471
12866	5.177	4.981	10585	4.316	4.165	6229	3.274	2.486
12926	5.177	4.986	10645	4.315	4.167	6289	3.274	2.501
12986	5.177	4.991	10705	4.315	4.17	6349	3.274	2.515
13046	5.177	4.996	10765	4.315	4.172	6409	3.274	2.529
13106	5.177	5	10825	4.315	4.175	6469	3.274	2.543
13166	5.177	5.005	10885	4.316	4.177	6529	3.274	2.557
13226	5.177	5.009	10945	4.315	4.18	6589	3.274	2.57
13286	5.177	5.013	11005	4.315	4.183	6649	3.274	2.583
13346	5.177	5.017	11065	4.315	4.185	6709	3.274	2.596
13406	5.177	5.02	11125	4.315	4.188	6769	3.273	2.608
13466	5.178	5.024	11185	4.315	4.19	6829	3.273	2.621
13526	5.177	5.028	11245	4.315	4.192	6889	3.272	2.633
13586	5.176	5.032	11305	4.315	4.194	6949	3.272	2.645
13646	5.177	5.035	11365	4.315	4.196	7009	3.272	2.656
13706	5.177	5.038	11425	4.315	4.198	7069	3.272	2.667
13766	5.176	5.042	11485	4.315	4.201	7129	3.272	2.678
13826	5.177	5.045	11545	4.315	4.202	7189	3.272	2.69
13886	5.176	5.047	11605	4.314	4.204	7249	3.271	2.7
13946	5.177	5.051	11665	4.315	4.207	7309	3.272	2.711
14006	5.177	5.053	11725	4.315	4.208	7369	3.272	2.721
14066	5.176	5.056	11785	4.315	4.21	7429	3.271	2.732
14126	5.177	5.059	11845	4.315	4.212	7489	3.271	2.742
14186	5.176	5.062	11905	4.315	4.214	7549	3.27	2.752
14246	5.176	5.064	11965	4.315	4.215	7609	3.271	2.761
14306	5.176	5.066	12025	4.315	4.216	7669	3.27	2.771
14366	5.176	5.068	12085	4.315	4.219	7729	3.271	2.78
14426	5.176	5.071	12145	4.315	4.22	7789	3.27	2.789
14486	5.177	5.073	12205	4.315	4.222	7849	3.27	2.798
14546	5.177	5.075	12265	4.315	4.223	7909	3.27	2.807
14606	5.177	5.077	12325	4.315	4.225	7969	3.269	2.816
14666	5.177	5.08	12385	4.314	4.226	8029	3.269	2.824
14726	5.176	5.082	12445	4.314	4.228	8089	3.269	2.833
14786	5.177	5.083	12505	4.315	4.229	8149	3.269	2.841
14846	5.177	5.085	12565	4.315	4.23	8209	3.269	2.849
14906	5.177	5.087	12625	4.314	4.232	8269	3.269	2.856
14966	5.176	5.089	12685	4.315	4.233	8329	3.269	2.864
15026	5.176	5.091	12745	4.315	4.234	8389	3.269	2.871
15086	5.177	5.093	12805	4.314	4.236	8449	3.269	2.879
15146	5.177	5.095	12865	4.314	4.237	8509	3.269	2.886
15206	5.177	5.096	12925	4.315	4.238	8569	3.269	2.892
15266	5.177	5.098	12985	4.314	4.239	8629	3.268	2.9
15326	5.176	5.099	13045	4.315	4.24	8689	3.268	2.907
15386	5.176	5.101	13105	4.315	4.241	8749	3.269	2.913
15446	5.176	5.102	13165	4.314	4.242	8809	3.268	2.919
15506	5.176	5.103	13225	4.315	4.243	8869	3.268	2.926
15566	5.176	5.104	13285	4.314	4.244	8929	3.268	2.932
15626	5.177	5.106	13345	4.314	4.245	8989	3.268	2.939
15686	5.176	5.107	13405	4.314	4.246	9049	3.268	2.945
15746	5.176	5.108	13465	4.314	4.247	9109	3.268	2.951
15806	5.177	5.109	13525	4.314	4.248	9169	3.267	2.956
15866	5.176	5.11	13585	4.314	4.249	9229	3.268	2.962
15926	5.177	5.112	13645	4.314	4.25	9289	3.268	2.967
15986	5.177	5.113	13705	4.314	4.25	9349	3.267	2.972
16046	5.177	5.114	13765	4.314	4.251	9409	3.268	2.977
16106	5.177	5.115	13825	4.314	4.252	9469	3.268	2.982
16166	5.176	5.116	13885	4.314	4.253	9529	3.268	2.987
16226	5.177	5.116	13945	4.314	4.254	9589	3.267	2.992
16286	5.177	5.117	14005	4.314	4.255	9649	3.266	2.996
16346	5.177	5.118	14065	4.314	4.255	9709	3.266	3.001
16406	5.176	5.119	14125	4.314	4.256	9769	3.268	3.005
16466	5.177	5.12	14185	4.313	4.256	9829	3.267	3.009
16526	5.177	5.121	14245	4.314	4.257	9889	3.266	3.013
16586	5.177	5.121	14305	4.314	4.258	9949	3.267	3.018
16646	5.177	5.122	14365	4.314	4.258	10009	3.266	3.022
16706	5.176	5.122	14425	4.313	4.26	10069	3.266	3.026
16766	5.177	5.125	14485	4.314	4.26	10129	3.266	3.029
16826	5.177	5.125	14545	4.314	4.26	10189	3.266	3.033
16886	5.177	5.125	14605	4.314	4.261	10249	3.266	3.038
16946	5.177	5.126	14665	4.314	4.261	10309	3.266	3.041
17006	5.177	5.127	14725	4.314	4.262	10369	3.265	3.044
17066	5.177	5.127	14785	4.312	4.263	10429	3.266	3.048
17126	5.177	5.128	14845	4.314	4.263	10489	3.265	3.052
17186	5.177	5.129	14905	4.314	4.264	10549	3.265	3.055
17246	5.177	5.129	14965	4.314	4.264	10609	3.265	3.058
17306	5.177	5.13	15025	4.314	4.265	10669	3.265	3.061
17366	5.177	5.131	15085	4.314	4.265	10729	3.265	3.064
17426	5.177	5.131	15145	4.314	4.266	10789	3.265	3.067
17486	5.177	5.131	15205	4.314	4.266	10849	3.265	3.07
17546	5.177	5.133	15265	4.313	4.267	10909	3.265	3.073
17606	5.178	5.133	15325	4.314	4.267	10969	3.265	3.076
17666	5.177	5.134	15385	4.314	4.268	11029	3.265	3.079
17726	5.177	5.134	15445	4.315	4.268	11089	3.265	3.082
17786	5.177	5.134	15505	4.314	4.269	11149	3.265	3.084
17846	5.177	5.135	15565	4.314	4.269	11209	3.265	3.087
17906	5.177	5.135	15625	4.313	4.27	11269	3.265	3.089
17966	5.178	5.136	15685	4.314	4.27	11329	3.265	3.092
18026	5.178	5.136	15745	4.313	4.27	11389	3.265	3.095
18086	5.177	5.137	15805	4.313	4.27	11449	3.265	3.098
18146	5.178	5.137	15865	4.314	4.271	11509	3.265	3.1
18206	5.178	5.138	15925	4.313	4.271	11569	3.265	3.102
18266	5.177	5.138	15985	4.314	4.272	11629	3.265	3.105
18326	5.178	5.137	16045	4.314	4.272	11689	3.264	3.107
18386	5.177	5.138	16105	4.313	4.273	11749	3.265	3.11
18446	5.177	5.138	16165	4.313	4.273	11809	3.263	3.112
18506	5.178	5.138	16225	4.313	4.273	11869	3.264	3.114
18566	5.178	5.139	16285	4.313	4.273	11929	3.264	3.116
18626	5.178	5.139	16345	4.314	4.274	11989	3.265	3.119
18686	5.177	5.139	16405	4.313	4.274	12049	3.264	3.12
18746	5.178	5.139	16465	4.314	4.274	12109	3.264	3.123
18806	5.177	5.14	16525	4.313	4.274	12169	3.263	3.125
18866	5.178	5.14	16585	4.313	4.275	12229	3.264	3.127
18926	5.178	5.14	16645	4.314	4.275	12289	3.263	3.129
18986	5.178	5.14	16705	4.314	4.276	12349	3.264	3.131
19046	5.178	5.14	16765	4.314	4.276	12409	3.264	3.132
19106	5.178	5.14	16825	4.314	4.276	12469	3.264	3.135
19166	5.178	5.14	16885	4.313	4.277	12529	3.263	3.136
19226	5.178	5.14	16945	4.313	4.277	12589	3.263	3.138
19286	5.178	5.14	17005	4.313	4.277	12649	3.263	3.14
19346	5.178	5.14	17065	4.313	4.278	12709	3.263	3.142
19406	5.178	5.142	17125	4.314	4.277	12769	3.263	3.143
19466	5.178	5.141	17185	4.314	4.278	12829	3.262	3.145
19526	5.178	5.142	17245	4.313	4.278	12889	3.263	3.146
19586	5.178	5.142	17305	4.313	4.279	12949	3.263	3.149
19646	5.178	5.143	17365	4.314	4.279	13009	3.263	3.15
19706	5.178	5.143	17425	4.313	4.279	13069	3.263	3.152
19766	5.178	5.143	17485	4.313	4.279	13129	3.263	3.153
19826	5.178	5.143	17545	4.313	4.279	13189	3.263	3.155
19886	5.178	5.143	17605	4.313	4.279	13249	3.262	3.156
19946	5.179	5.143	17665	4.313	4.279	13309	3.262	3.158
20006	5.179	5.143	17725	4.313	4.28	13369	3.263	3.159
20066	5.178	5.143	17785	4.313	4.279	13429	3.262	3.161
20126	5.179	5.144	17845	4.313	4.28	13489	3.262	3.161
20186	5.179	5.144	17905	4.313	4.281	13549	3.262	3.163
20246	5.179	5.144	17965	4.313	4.281	13609	3.262	3.164
20306	5.179	5.145	18025	4.314	4.281	13669	3.262	3.165
20366	5.178	5.145	18085	4.313	4.281	13729	3.262	3.167
20426	5.18	5.145	18145	4.313	4.282	13789	3.262	3.168
20486	5.179	5.144	18205	4.313	4.282	13849	3.262	3.169
20546	5.18	5.145	18265	4.313	4.282	13909	3.262	3.17
20606	5.18	5.146	18325	4.313	4.282	13969	3.262	3.171
20666	5.179	5.145	18385	4.313	4.282	14029	3.262	3.173
20726	5.179	5.145	18445	4.313	4.281	14089	3.262	3.173
20786	5.178	5.145	18505	4.313	4.282	14149	3.262	3.174
20846	5.18	5.146	18565	4.313	4.282	14209	3.262	3.176
20906	5.179	5.146	18625	4.312	4.282	14269	3.262	3.176
20966	5.179	5.146	18685	4.313	4.282	14329	3.262	3.178
21026	5.179	5.146	18745	4.313	4.282	14389	3.262	3.179
21086	5.18	5.146	18805	4.312	4.283	14449	3.262	3.179
21146	5.18	5.146	18865	4.313	4.283	14509	3.262	3.181
21206	5.18	5.146	18925	4.312	4.283	14569	3.261	3.181
21266	5.18	5.146	18985	4.313	4.283	14629	3.262	3.182
21326	5.18	5.146	19045	4.313	4.283	14689	3.261	3.183
21386	5.18	5.146	19105	4.312	4.283	14749	3.262	3.185
21446	5.18	5.147	19165	4.312	4.283	14809	3.262	3.185
21506	5.18	5.146	19225	4.313	4.284	14869	3.262	3.186
21566	5.18	5.147	19285	4.312	4.284	14929	3.261	3.187
21626	5.18	5.147	19345	4.313	4.284	14989	3.261	3.188
21686	5.181	5.147	19405	4.313	4.284	15049	3.261	3.188
21746	5.18	5.147	19465	4.313	4.284	15109	3.261	3.189
21806	5.18	5.147	19525	4.313	4.284	15169	3.261	3.19
21866	5.181	5.147	19585	4.313	4.284	15229	3.262	3.191
21926	5.18	5.148	19645	4.313	4.284	15289	3.261	3.191
21986	5.18	5.144	19705	4.313	4.284	15349	3.261	3.193
22046	5.18	4.914	19765	4.312	4.285	15409	3.261	3.194
22106	5.18	4.923	19825	4.313	4.285	15469	3.261	3.194
22166	5.18	4.93	19885	4.312	4.285	15529	3.261	3.194
22226	5.18	4.936	19945	4.313	4.285	15589	3.261	3.196
22286	5.181	4.944	20005	4.312	4.285	15649	3.261	3.196
22346	5.18	4.95	20065	4.312	4.285	15709	3.261	3.197
22406	5.178	4.956	20125	4.313	4.285	15769	3.261	3.197
22466	5.18	4.962	20185	4.312	4.285	15829	3.261	3.198
22526	5.179	4.967	20245	4.312	4.285	15889	3.26	3.199
22586	5.179	4.973	20305	4.312	4.285	15949	3.261	3.199
22646	5.18	4.978	20365	4.312	4.285	16009	3.26	3.2
22706	5.18	4.983	20425	4.312	4.286	16069	3.261	3.2
22766	5.178	4.988	20485	4.313	4.285	16129	3.26	3.201
22826	5.179	4.993	20545	4.312	4.286	16189	3.261	3.201
22886	5.18	4.997	20605	4.312	4.285	16249	3.261	3.203
22946	5.18	5.002	20665	4.312	4.286	16309	3.261	3.203
23006	5.179	5.005	20725	4.312	4.286	16369	3.261	3.203
23066	5.179	5.01	20785	4.312	4.286	16429	3.26	3.203
23126	5.18	5.014	20845	4.312	4.286	16489	3.261	3.204
23186	5.18	5.018	20905	4.312	4.286	16549	3.26	3.205
23246	5.179	5.022	20965	4.312	4.286	16609	3.26	3.206
23306	5.179	5.026	21025	4.312	4.286	16669	3.26	3.206
23366	5.179	5.03	21085	4.313	4.286	16729	3.261	3.207
23426	5.179	5.033	21145	4.312	4.286	16789	3.26	3.206
23486	5.179	5.036	21205	4.312	4.286	16849	3.26	3.207
23546	5.179	5.04	21265	4.312	4.286	16909	3.26	3.208
23606	5.179	5.043	21325	4.312	4.287	16969	3.26	3.208
23666	5.179	5.046	21385	4.312	4.286	17029	3.26	3.209
23726	5.179	5.049	21445	4.312	4.286	17089	3.259	3.209
23786	5.18	5.051	21505	4.312	4.286	17149	3.26	3.21
23846	5.179	5.055	21565	4.312	4.286	17209	3.26	3.21
23906	5.18	5.058	21625	4.312	4.287	17269	3.26	3.211
23966	5.18	5.06	21685	4.312	4.286	17329	3.26	3.212
24026	5.18	5.062	21745	4.312	4.286	17389	3.259	3.212
24086	5.179	5.065	21805	4.312	4.286	17449	3.259	3.212
24146	5.179	5.068	21865	4.312	4.286	17509	3.259	3.213
24206	5.18	5.071	21925	4.312	4.287	17569	3.259	3.213
24266	5.18	5.072	21985	4.312	4.287	17629	3.259	3.213
24326	5.18	5.075	22045	4.312	4.287	17689	3.26	3.214
24386	5.179	5.077	22105	4.312	4.287	17749	3.259	3.214
24446	5.178	5.079	22165	4.312	4.287	17809	3.259	3.215
24506	5.178	5.081	22225	4.311	4.287	17869	3.259	3.215
24566	5.179	5.083	22285	4.312	4.287	17929	3.259	3.216
24626	5.178	5.085	22345	4.312	4.287	17989	3.259	3.216
24686	5.179	5.087	22405	4.312	4.287	18049	3.259	3.217
24746	5.179	5.089	22465	4.312	4.288	18109	3.259	3.217
24806	5.179	5.09	22525	4.312	4.287	18169	3.26	3.217
24866	5.179	5.092	22585	4.312	4.287	18229	3.259	3.217
24926	5.18	5.094	22645	4.312	4.287	18289	3.259	3.218
24986	5.179	5.095	22705	4.312	4.287	18349	3.259	3.218
25046	5.18	5.097	22765	4.312	4.287	18409	3.259	3.218
25106	5.18	5.098	22825	4.312	4.287	18469	3.259	3.218
25166	5.179	5.1	22885	4.312	4.287	18529	3.259	3.219
25226	5.18	5.101	22945	4.312	4.288	18589	3.259	3.22
25286	5.18	5.103	23005	4.312	4.288	18649	3.259	3.22
25346	5.18	5.104	23065	4.312	4.287	18709	3.259	3.22
25406	5.179	5.105	23125	4.312	4.288	18769	3.259	3.221
25466	5.179	5.107	23185	4.312	4.287	18829	3.259	3.221
25526	5.179	5.108	23245	4.311	4.287	18889	3.259	3.221
25586	5.18	5.109	23305	4.311	4.288	18949	3.259	3.221
25646	5.18	5.111	23365	4.312	4.287	19009	3.258	3.221
25706	5.179	5.111	23425	4.312	4.287	19069	3.258	3.221
25766	5.18	5.113	23485	4.311	4.288	19129	3.258	3.222
25826	5.179	5.113	23545	4.312	4.287	19189	3.259	3.223
25886	5.179	5.114	23605	4.311	4.287	19249	3.258	3.223
25946	5.18	5.116	23665	4.312	4.287	19309	3.258	3.223
26006	5.18	5.117	23725	4.311	4.287	19369	3.258	3.223
26066	5.181	5.117	23785	4.312	4.287	19429	3.258	3.224
26126	5.179	5.118	23845	4.311	4.288	19489	3.258	3.224
26186	5.181	5.119	23905	4.312	4.287	19549	3.258	3.224
26246	5.18	5.12	23965	4.311	4.288	19609	3.258	3.225
26306	5.18	5.121	24025	4.312	4.287	19669	3.258	3.225
26366	5.18	5.122	24085	4.312	4.287	19729	3.258	3.226
26426	5.18	5.122	24145	4.312	4.287	19789	3.258	3.225
26486	5.179	5.123	24205	4.312	4.288	19849	3.259	3.226
26546	5.18	5.125	24265	4.311	4.288	19909	3.258	3.226
26606	5.18	5.125	24325	4.312	4.287	19969	3.258	3.226
26666	5.18	5.125	24385	4.311	4.288	20029	3.258	3.227
26726	5.181	5.126	24445	4.312	4.287	20089	3.258	3.227
26786	5.179	5.127	24505	4.312	4.288	20149	3.258	3.227
26846	5.18	5.127	24565	4.311	4.288	20209	3.258	3.227
26906	5.18	5.128	24625	4.311	4.288	20269	3.257	3.227
26966	5.18	5.129	24685	4.311	4.287	20329	3.258	3.227
27026	5.18	5.129	24745	4.312	4.288	20389	3.257	3.227
27086	5.18	5.13	24805	4.311	4.288	20449	3.257	3.228
27146	5.18	5.13	24865	4.311	4.287	20509	3.258	3.228
27206	5.18	5.131	24925	4.312	4.288	20569	3.257	3.228
27266	5.18	5.131	24985	4.312	4.287	20629	3.257	3.228
27326	5.18	5.131	25045	4.311	4.287	20689	3.257	3.228
27386	5.18	5.132	25105	4.312	4.287	20749	3.257	3.228
27446	5.18	5.133	25165	4.312	4.287	20809	3.257	3.229
27506	5.18	5.134	25225	4.312	4.288	20869	3.257	3.228
27566	5.18	5.134	25285	4.312	4.288	20929	3.257	3.23
27626	5.18	5.134	25345	4.311	4.288	20989	3.257	3.23
27686	5.18	5.134	25405	4.311	4.288	21049	3.257	3.23
27746	5.18	5.135	25465	4.311	4.288	21109	3.257	3.23
27806	5.18	5.135	25525	4.31	4.288	21169	3.257	3.23
27866	5.18	5.136	25585	4.312	4.288	21229	3.257	3.23
27926	5.18	5.136	25645	4.312	4.288	21289	3.257	3.23
27986	5.18	5.137	25705	4.311	4.288	21349	3.257	3.23
28046	5.181	5.132	25765	4.31	4.288	21409	3.257	3.23
28106	5.18	5.021	25825	4.311	4.288	21469	3.257	3.23
28166	5.18	4.945	25885	4.311	4.288	21529	3.257	3.231
28226	5.18	4.956	25945	4.312	4.288	21589	3.257	3.231
28286	5.181	4.963	26005	4.312	4.288	21649	3.256	3.231
28346	5.18	4.97	26065	4.311	4.288	21709	3.257	3.231
28406	5.179	4.975	26125	4.311	4.288	21769	3.257	3.231
28466	5.18	4.981	26185	4.311	4.288	21829	3.257	3.232
28526	5.18	4.987	26245	4.311	4.288	21889	3.257	3.232
28586	5.179	4.991	26305	4.311	4.288	21949	3.257	3.232
28646	5.179	4.996	26365	4.311	4.288	22009	3.257	3.232
28706	5.18	5	26425	4.31	4.288	22069	3.256	3.232
28766	5.179	5.005	26485	4.311	4.288	22129	3.256	3.232
28826	5.179	5.009	26545	4.311	4.288	22189	3.256	3.232
28886	5.178	5.013	26605	4.311	4.288	22249	3.256	3.232
28946	5.179	5.017	26665	4.311	4.288	22309	3.256	3.233
29006	5.178	5.021	26725	4.31	4.288	22369	3.256	3.233
29066	5.179	5.025	26785	4.312	4.287	22429	3.257	3.232
29126	5.179	5.029	26845	4.311	4.288	22489	3.256	3.233
29186	5.178	5.032	26905	4.311	4.288	22549	3.257	3.233
29246	5.178	5.035	26965	4.311	4.288	22609	3.256	3.233
29306	5.178	5.039	27025	4.311	4.288	22669	3.256	3.233
29366	5.178	5.042	27085	4.31	4.288	22729	3.256	3.233
29426	5.178	5.046	27145	4.311	4.288	22789	3.256	3.233
29486	5.178	5.049	27205	4.311	4.288	22849	3.256	3.233
29546	5.178	5.052	27265	4.312	4.288	22909	3.256	3.233
29606	5.178	5.054	27325	4.311	4.288	22969	3.256	3.233
29666	5.179	5.057	27385	4.31	4.288	23029	3.256	3.233
29726	5.178	5.06	27445	4.312	4.288	23089	3.256	3.233
29786	5.178	5.063	27505	4.312	4.288	23149	3.256	3.234
29846	5.178	5.065	27565	4.311	4.287	23209	3.256	3.233
29906	5.178	5.068	27625	4.311	4.288	23269	3.256	3.234
29966	5.178	5.07	27685	4.31	4.288	23329	3.256	3.234
30026	5.178	5.072	27745	4.31	4.288	23389	3.256	3.234
30086	5.178	5.074	27805	4.31	4.288	23449	3.256	3.234
30146	5.178	5.077	27865	4.309	4.288	23509	3.256	3.234
30206	5.178	5.078	27925	4.311	4.288	23569	3.256	3.235
30266	5.178	5.08	27985	4.31	4.288	23629	3.256	3.235
30326	5.178	5.082	28045	4.31	4.288	23689	3.256	3.235
30386	5.178	5.085	28105	4.31	4.288	23749	3.256	3.235
30446	5.178	5.086	28165	4.31	4.288	23809	3.256	3.235
30506	5.178	5.089	28225	4.31	4.288	23869	3.255	3.236
30566	5.178	5.09	28285	4.31	4.288	23929	3.256	3.236
30626	5.178	5.092	28345	4.312	4.288	23989	3.256	3.236
30686	5.178	5.093	28405	4.31	4.288	24049	3.256	3.236
30746	5.178	5.095	28465	4.31	4.288	24109	3.256	3.236
30806	5.178	5.096	28525	4.31	4.288	24169	3.256	3.236
30866	5.178	5.098	28585	4.312	4.288	24229	3.256	3.236
30926	5.178	5.099	28645	4.311	4.288	24289	3.256	3.236
30986	5.178	5.101	28705	4.31	4.288	24349	3.256	3.236
31046	5.178	5.103	28765	4.311	4.288	24409	3.256	3.236
31106	5.178	5.104	28825	4.31	4.288	24469	3.256	3.236
31166	5.178	5.104	28885	4.31	4.287	24529	3.256	3.236
31226	5.178	5.107	28945	4.31	4.287	24589	3.256	3.236
31286	5.178	5.107	29005	4.31	4.288	24649	3.256	3.236
31346	5.179	5.109	29065	4.31	4.288	24709	3.256	3.236
31406	5.178	5.11	29125	4.31	4.288	24769	3.256	3.236
31466	5.178	5.111	29185	4.31	4.288	24829	3.256	3.236
31526	5.178	5.112	29245	4.31	4.288	24889	3.255	3.236
31586	5.178	5.113	29305	4.31	4.287	24949	3.255	3.236
31646	5.178	5.113	29365	4.31	4.287	25009	3.256	3.236
31706	5.178	5.114	29425	4.309	4.287	25069	3.256	3.236
31766	5.178	5.116	29485	4.31	4.288	25129	3.256	3.236
31826	5.178	5.117	29545	4.31	4.288	25189	3.256	3.237
31886	5.178	5.117	29605	4.309	4.287	25249	3.256	3.236
31946	5.178	5.118	29665	4.31	4.288	25309	3.255	3.237
32006	5.178	5.119	29725	4.309	4.287	25369	3.256	3.237
32066	5.178	5.12	29785	4.31	4.287	25429	3.255	3.237
32126	5.178	5.121	29845	4.31	4.288	25489	3.256	3.236
32186	5.179	5.122	29905	4.31	4.288	25549	3.254	3.237
32246	5.178	5.122	29965	4.309	4.288	25609	3.255	3.237
32306	5.178	5.123	30025	4.31	4.287	25669	3.255	3.237
32366	5.178	5.123	30085	4.31	4.287	25729	3.255	3.237
32426	5.178	5.124	30145	4.31	4.287	25789	3.256	3.237
32486	5.178	5.125	30205	4.31	4.288	25849	3.255	3.237
32546	5.178	5.125	30265	4.31	4.288	25909	3.255	3.236
32606	5.178	5.116	30325	4.309	4.288	25969	3.255	3.236
32666	5.178	5.014	30385	4.309	4.287	26029	3.254	3.236
32726	5.178	4.944	30445	4.31	4.287	26089	3.255	3.237
32786	5.178	4.954	30505	4.31	4.288	26149	3.254	3.237
32846	5.178	4.961	30565	4.309	4.287	26209	3.255	3.237
32906	5.177	4.968	30625	4.31	4.288	26269	3.255	3.238
32966	5.177	4.974	30685	4.309	4.287	26329	3.255	3.237
33026	5.177	4.979	30745	4.309	4.287	26389	3.255	3.237
33086	5.177	4.984	30805	4.31	4.287	26449	3.255	3.237
33146	5.177	4.99	30865	4.309	4.287	26509	3.255	3.237
33206	5.177	4.994	30925	4.31	4.287	26569	3.254	3.238
33266	5.176	4.999	30985	4.309	4.287	26629	3.254	3.238
33326	5.177	5.003	31045	4.309	4.287	26689	3.256	3.238
33386	5.176	5.008	31105	4.309	4.287	26749	3.254	3.237
33446	5.177	5.011	31165	4.309	4.288	26809	3.254	3.238
33506	5.177	5.015	31225	4.309	4.287	26869	3.254	3.237
33566	5.177	5.019	31285	4.31	4.287	26929	3.254	3.238
33626	5.176	5.023	31345	4.309	4.287	26989	3.256	3.238
33686	5.177	5.026	31405	4.309	4.287	27049	3.254	3.238
33746	5.176	5.03	31465	4.309	4.287	27109	3.254	3.238
33806	5.176	5.033	31525	4.309	4.287	27169	3.255	3.238
33866	5.176	5.037	31585	4.309	4.287	27229	3.254	3.238
33926	5.176	5.04	31645	4.309	4.287	27289	3.255	3.238
33986	5.176	5.044	31705	4.309	4.287	27349	3.255	3.237
34046	5.176	5.046	31765	4.309	4.287	27409	3.254	3.238
34106	5.176	5.049	31825	4.309	4.287	27469	3.254	3.238
34166	5.176	5.053	31885	4.309	4.287	27529	3.254	3.237
34226	5.176	5.055	31945	4.309	4.287	27589	3.254	3.238
34286	5.176	5.058	32005	4.309	4.286	27649	3.254	3.238
34346	5.176	5.06	32065	4.309	4.287	27709	3.254	3.237
34406	5.176	5.063	32125	4.309	4.287	27769	3.254	3.237
34466	5.176	5.066	32185	4.309	4.287	27829	3.254	3.238
34526	5.176	5.068	32245	4.309	4.287	27889	3.254	3.238
34586	5.176	5.071	32305	4.309	4.287	27949	3.254	3.238
34646	5.176	5.072	32365	4.309	4.287	28009	3.254	3.238
34706	5.176	5.074	32425	4.309	4.287	28069	3.254	3.238
34766	5.175	5.076	32485	4.309	4.287	28129	3.254	3.238
34826	5.175	5.078	32545	4.309	4.287	28189	3.253	3.238
34886	5.175	5.08	32605	4.309	4.287	28249	3.254	3.238
34946	5.176	5.082	32665	4.309	4.286	28309	3.254	3.238
35006	5.176	5.084	32725	4.309	4.287	28369	3.253	3.237
35066	5.175	5.086	32785	4.309	4.287	28429	3.254	3.237
35126	5.176	5.088	32845	4.309	4.286	28489	3.254	3.237
35186	5.176	5.089	32905	4.309	4.287	28549	3.253	3.237
35246	5.175	5.091	32965	4.309	4.287	28609	3.254	3.238
35306	5.176	5.092	33025	4.309	4.286	28669	3.254	3.238
35366	5.176	5.095	33085	4.309	4.286	28729	3.253	3.239
35426	5.175	5.096	33145	4.309	4.286	28789	3.253	3.239
35486	5.175	5.098	33205	4.309	4.287	28849	3.254	3.239
35546	5.175	5.099	33265	4.309	4.286	28909	3.254	3.239
35606	5.175	5.1	33325	4.309	4.287	28969	3.254	3.239
35666	5.176	5.101	33385	4.309	4.287	29029	3.253	3.239
35726	5.176	5.103	33445	4.309	4.286	29089	3.254	3.239
35786	5.176	5.104	33505	4.309	4.287	29149	3.253	3.239
35846	5.176	5.105	33565	4.309	4.286	29209	3.254	3.238
35906	5.175	5.107	33625	4.309	4.286	29269	3.254	3.238
35966	5.176	5.108	33685	4.309	4.286	29329	3.254	3.239
36026	5.175	5.109	33745	4.309	4.286	29389	3.254	3.238
36086	5.175	5.11	33805	4.308	4.286	29449	3.254	3.238
36146	5.176	5.111	33865	4.308	4.286	29509	3.253	3.238
36206	5.175	5.111	33925	4.309	4.286	29569	3.254	3.238
36266	5.176	5.112	33985	4.309	4.286	29629	3.254	3.238
36326	5.175	5.113	34045	4.309	4.286	29689	3.254	3.237
36386	5.175	5.114	34105	4.309	4.286	29749	3.254	3.237
36446	5.175	5.115	34165	4.309	4.286	29809	3.253	3.238
36506	5.175	5.116	34225	4.309	4.286	29869	3.254	3.237
36566	5.175	5.117	34285	4.309	4.286	29929	3.253	3.237
36626	5.175	5.117	34345	4.309	4.286	29989	3.254	3.238
36686	5.175	5.118	34405	4.309	4.286	30049	3.253	3.238
36746	5.175	5.119	34465	4.308	4.286	30109	3.253	3.238
36806	5.175	5.12	34525	4.309	4.286	30169	3.254	3.238
36866	5.175	5.121	34585	4.309	4.286	30229	3.253	3.238
36926	5.175	5.122	34645	4.308	4.286	30289	3.253	3.237
36986	5.175	5.122	34705	4.308	4.286	30349	3.254	3.238
37046	5.175	5.122	34765	4.307	4.286	30409	3.253	3.236
37106	5.175	5.123	34825	4.309	4.286	30469	3.253	3.146
37166	5.175	5.123	34885	4.309	4.286	30529	3.253	3.151
37226	5.174	5.125	34945	4.308	4.286	30589	3.253	3.158
37286	5.175	5.125	35005	4.308	4.286	30649	3.253	3.162
37346	5.175	5.125	35065	4.308	4.286	30709	3.254	3.164
37406	5.174	5.126	35125	4.308	4.286	30769	3.253	3.167
37466	5.175	5.126	35185	4.308	4.286	30829	3.254	3.168
37526	5.175	5.127	35245	4.308	4.286	30889	3.253	3.17
37586	5.175	5.127	35305	4.308	4.286	30949	3.253	3.171
37646	5.175	5.127	35365	4.308	4.286	31009	3.253	3.172
37706	5.175	5.128	35425	4.308	4.285	31069	3.254	3.173
37766	5.175	5.129	35485	4.308	4.286	31129	3.254	3.174
37826	5.175	5.129	35545	4.309	4.285	31189	3.253	3.176
37886	5.175	5.13	35605	4.308	4.286	31249	3.254	3.176
37946	5.175	5.13	35665	4.308	4.285	31309	3.253	3.177
38006	5.175	5.131	35725	4.309	4.285	31369	3.253	3.178
38066	5.175	5.131	35785	4.309	4.285	31429	3.254	3.179
38126	5.175	5.131	35845	4.308	4.286	31489	3.253	3.18
38186	5.175	5.131	35905	4.309	4.286	31549	3.254	3.181
38246	5.175	5.131	35965	4.308	4.286	31609	3.253	3.182
38306	5.175	5.132	36025	4.308	4.286	31669	3.253	3.182
38366	5.175	5.133	36085	4.308	4.286	31729	3.254	3.184
38426	5.175	5.133	36145	4.308	4.285	31789	3.254	3.184
38486	5.175	5.133	36205	4.309	4.286	31849	3.254	3.185
38546	5.175	5.134	36265	4.307	4.286	31909	3.254	3.186
38606	5.175	5.134	36325	4.308	4.285	31969	3.254	3.187
38666	5.175	5.134	36385	4.308	4.286	32029	3.254	3.188
38726	5.175	5.134	36445	4.308	4.285	32089	3.254	3.188
38786	5.176	5.135	36505	4.308	4.286	32149	3.254	3.189
38846	5.175	5.135	36565	4.308	4.286	32209	3.254	3.19
38906	5.175	5.135	36625	4.307	4.286	32269	3.254	3.191
38966	5.175	5.135	36685	4.307	4.286	32329	3.254	3.191
39026	5.175	5.136	36745	4.307	4.285	32389	3.254	3.192
39086	5.175	5.136	36805	4.308	4.285	32449	3.253	3.192
39146	5.175	5.136	36865	4.306	4.286	32509	3.254	3.193
39206	5.174	5.136	36925	4.307	4.285	32569	3.254	3.194
39266	5.175	5.136	36985	4.307	4.285	32629	3.254	3.194
39326	5.174	5.137	37045	4.307	4.285	32689	3.254	3.196
39386	5.175	5.137	37105	4.307	4.285	32749	3.254	3.196
39446	5.175	5.137	37165	4.307	4.285	32809	3.253	3.196
39506	5.175	5.137	37225	4.307	4.285	32869	3.254	3.197
39566	5.175	5.133	37285	4.304	4.286	32929	3.254	3.197
39626	5.175	5.123	37345	4.304	4.17	32989	3.254	3.198
39686	5.174	4.93	37405	4.305	4.181	33049	3.254	3.199
39746	5.174	4.944	37465	4.305	4.19	33109	3.254	3.199
39806	5.174	4.953	37525	4.305	4.196	33169	3.254	3.2
39866	5.174	4.96	37585	4.305	4.2	33229	3.253	3.2
39926	5.174	4.966	37645	4.306	4.203	33289	3.254	3.201
39986	5.173	4.973	37705	4.306	4.205	33349	3.254	3.202
40046	5.173	4.978	37765	4.305	4.207	33409	3.254	3.203
40106	5.174	4.983	37825	4.305	4.209	33469	3.253	3.203
40166	5.174	4.987	37885	4.305	4.21	33529	3.253	3.203
40226	5.173	4.992	37945	4.305	4.213	33589	3.254	3.204
40286	5.173	4.997	38005	4.305	4.215	33649	3.254	3.204
40346	5.173	5.001	38065	4.305	4.216	33709	3.253	3.205
40406	5.174	5.005	38125	4.306	4.216	33769	3.253	3.206
40466	5.173	5.009	38185	4.306	4.219	33829	3.253	3.206
40526	5.173	5.013	38245	4.306	4.219	33889	3.253	3.207
40586	5.172	5.017	38305	4.306	4.221	33949	3.253	3.207
40646	5.173	5.02	38365	4.306	4.222	34009	3.253	3.208
40706	5.173	5.025	38425	4.306	4.223	34069	3.254	3.209
40766	5.173	5.028	38485	4.306	4.225	34129	3.254	3.209
40826	5.172	5.032	38545	4.306	4.225	34189	3.253	3.209
40886	5.172	5.035	38605	4.306	4.227	34249	3.253	3.21
40946	5.173	5.038	38665	4.306	4.228	34309	3.253	3.21
41006	5.173	5.041	38725	4.306	4.229	34369	3.254	3.211
41066	5.172	5.044	38785	4.306	4.23	34429	3.254	3.211
41126	5.172	5.047	38845	4.307	4.231	34489	3.253	3.212
41186	5.172	5.05	38905	4.306	4.232	34549	3.253	3.212
41246	5.172	5.053	38965	4.306	4.233	34609	3.253	3.212
41306	5.172	5.055	39025	4.306	4.234	34669	3.254	3.212
41366	5.172	5.058	39085	4.306	4.235	34729	3.253	3.213
41426	5.172	5.06	39145	4.306	4.237	34789	3.254	3.213
41486	5.172	5.062	39205	4.306	4.237	34849	3.253	3.213
41546	5.172	5.065	39265	4.306	4.238	34909	3.253	3.214
41606	5.172	5.067	39325	4.306	4.239	34969	3.253	3.213
41666	5.172	5.069	39385	4.306	4.24	35029	3.254	3.214
41726	5.172	5.071	39445	4.306	4.24	35089	3.253	3.215
41786	5.172	5.074	39505	4.306	4.241	35149	3.254	3.215
41846	5.172	5.076	39565	4.306	4.242	35209	3.253	3.215
41906	5.172	5.078	39625	4.306	4.243	35269	3.253	3.215
41966	5.172	5.08	39685	4.306	4.243	35329	3.253	3.215
42026	5.172	5.082	39745	4.306	4.245	35389	3.253	3.216
42086	5.172	5.083	39805	4.306	4.246	35449	3.253	3.216
42146	5.172	5.085	39865	4.306	4.246	35509	3.253	3.216
42206	5.172	5.087	39925	4.306	4.247	35569	3.253	3.217
42266	5.172	5.088	39985	4.306	4.247	35629	3.253	3.218
42326	5.172	5.089	40045	4.306	4.248	35689	3.253	3.218
42386	5.172	5.091	40105	4.306	4.249	35749	3.253	3.218
42446	5.17	5.093	40165	4.306	4.25	35809	3.253	3.218
42506	5.172	5.094	40225	4.306	4.25	35869	3.253	3.218
42566	5.172	5.095	40285	4.306	4.251	35929	3.253	3.218
42626	5.171	5.096	40345	4.306	4.252	35989	3.253	3.218
42686	5.172	5.098	40405	4.306	4.252	36049	3.253	3.219
42746	5.172	5.099	40465	4.306	4.252	36109	3.253	3.218
42806	5.172	5.1	40525	4.306	4.254	36169	3.253	3.219
42866	5.172	5.101	40585	4.306	4.254	36229	3.253	3.219
42926	5.172	5.102	40645	4.306	4.255	36289	3.253	3.22
42986	5.172	5.104	40705	4.306	4.255	36349	3.253	3.22
43046	5.17	5.104	40765	4.306	4.256	36409	3.253	3.221
43106	5.171	5.106	40825	4.306	4.256	36469	3.253	3.221
43166	5.172	5.107	40885	4.306	4.257	36529	3.253	3.221
43226	5.172	5.108	40945	4.306	4.257	36589	3.253	3.221
43286	5.172	5.109	41005	4.306	4.257	36649	3.253	3.221
43346	5.171	5.11	41065	4.306	4.258	36709	3.253	3.221
43406	5.172	5.111	41125	4.306	4.258	36769	3.253	3.221
43466	5.172	5.112	41185	4.306	4.26	36829	3.253	3.222
43526	5.171	5.113	41245	4.306	4.26	36889	3.253	3.222
43586	5.171	5.113	41305	4.306	4.26	36949	3.253	3.223
43646	5.171	5.114	41365	4.306	4.261	37009	3.253	3.222
43706	5.171	5.115	41425	4.306	4.261	37069	3.253	3.223
43766	5.171	5.116	41485	4.306	4.261	37129	3.253	3.223
43826	5.171	5.116	41545	4.306	4.262	37189	3.253	3.224
43886	5.17	5.117	41605	4.306	4.263	37249	3.253	3.224
43946	5.171	5.118	41665	4.306	4.263	37309	3.253	3.224
44006	5.17	5.118	41725	4.306	4.264	37369	3.253	3.224
44066	5.17	5.109	41785	4.306	4.264	37429	3.253	3.224
44126	5.171	5.089	41845	4.306	4.264	37489	3.253	3.224
44186	5.17	4.92	41905	4.306	4.264	37549	3.253	3.225
44246	5.17	4.933	41965	4.306	4.265	37609	3.253	3.225
44306	5.169	4.942	42025	4.306	4.266	37669	3.253	3.225
44366	5.169	4.95	42085	4.306	4.266	37729	3.253	3.225
44426	5.17	4.956	42145	4.306	4.267	37789	3.253	3.225
44486	5.169	4.961	42205	4.306	4.267	37849	3.253	3.225
44546	5.169	4.968	42265	4.306	4.267	37909	3.253	3.226
44606	5.169	4.972	42325	4.306	4.267	37969	3.253	3.226
44666	5.17	4.978	42385	4.306	4.269	38029	3.252	3.227
44726	5.169	4.982	42445	4.306	4.268	38089	3.252	3.227
44786	5.169	4.987	42505	4.306	4.269	38149	3.252	3.227
44846	5.169	4.992	42565	4.306	4.269	38209	3.253	3.227
44906	5.169	4.997	42625	4.306	4.27	38269	3.252	3.227
44966	5.169	5.001	42685	4.306	4.27	38329	3.252	3.227
45026	5.169	5.005	42745	4.306	4.27	38389	3.251	3.227
45086	5.169	5.009	42805	4.306	4.27	38449	3.253	3.222
45146	5.169	5.013	42865	4.306	4.27	38509	3.252	3.142
45206	5.169	5.017	42925	4.306	4.27	38569	3.252	3.152
45266	5.169	5.02	42985	4.306	4.271	38629	3.252	3.158
45326	5.169	5.024	43045	4.306	4.271	38689	3.252	3.162
45386	5.169	5.028	43105	4.306	4.271	38749	3.252	3.165
45446	5.168	5.031	43165	4.306	4.271	38809	3.252	3.167
45506	5.168	5.034	43225	4.306	4.272	38869	3.253	3.168
45566	5.168	5.037	43285	4.306	4.261	38929	3.253	3.17
45626	5.168	5.04	43345	4.306	4.169	38989	3.252	3.171
45686	5.168	5.043	43405	4.306	4.178	39049	3.252	3.173
45746	5.168	5.045	43465	4.306	4.185	39109	3.253	3.174
45806	5.168	5.048	43525	4.306	4.19	39169	3.252	3.176
45866	5.168	5.051	43585	4.306	4.194	39229	3.252	3.176
45926	5.168	5.053	43645	4.306	4.196	39289	3.253	3.177
45986	5.168	5.056	43705	4.306	4.198	39349	3.253	3.178
46046	5.168	5.059	43765	4.307	4.2	39409	3.252	3.179
46106	5.168	5.062	43825	4.306	4.202	39469	3.253	3.18
46166	5.167	5.063	43885	4.306	4.204	39529	3.253	3.181
46226	5.167	5.065	43945	4.307	4.206	39589	3.253	3.182
46286	5.166	5.068	44005	4.307	4.207	39649	3.253	3.182
46346	5.167	5.069	44065	4.306	4.21	39709	3.253	3.183
46406	5.167	5.071	44125	4.308	4.211	39769	3.253	3.185
46466	5.166	5.073	44185	4.308	4.213	39829	3.253	3.185
46526	5.167	5.075	44245	4.308	4.214	39889	3.253	3.186
46586	5.167	5.077	44305	4.308	4.216	39949	3.253	3.187
46646	5.166	5.078	44365	4.308	4.216	40009	3.253	3.187
46706	5.167	5.08	44425	4.308	4.218	40069	3.253	3.188
46766	5.167	5.082	44485	4.309	4.219	40129	3.253	3.189
46826	5.167	5.084	44545	4.308	4.221	40189	3.253	3.19
46886	5.166	5.085	44605	4.308	4.222	40249	3.253	3.191
46946	5.167	5.086	44665	4.308	4.223	40309	3.253	3.191
47006	5.166	5.089	44725	4.309	4.225	40369	3.253	3.191
47066	5.166	5.089	44785	4.308	4.226	40429	3.253	3.192
47126	5.166	5.09	44845	4.308	4.227	40489	3.253	3.193
47186	5.166	5.092	44905	4.308	4.228	40549	3.253	3.194
47246	5.166	5.094	44965	4.308	4.229	40609	3.253	3.194
47306	5.166	5.095	45025	4.309	4.23	40669	3.253	3.195
47366	5.167	5.096	45085	4.309	4.231	40729	3.253	3.195
47426	5.166	5.097	45145	4.309	4.232	40789	3.253	3.196
47486	5.166	5.098	45205	4.309	4.233	40849	3.253	3.197
47546	5.166	5.099	45265	4.309	4.234	40909	3.253	3.197
47606	5.166	5.1	45325	4.308	4.235	40969	3.253	3.198
47666	5.166	5.102	45385	4.309	4.237	41029	3.253	3.199
47726	5.166	5.102	45445	4.309	4.237	41089	3.253	3.199
47786	5.166	5.104	45505	4.308	4.238	41149	3.253	3.199
47846	5.166	5.104	45565	4.309	4.239	41209	3.253	3.2
47906	5.166	5.105	45625	4.309	4.24	41269	3.253	3.2
47966	5.166	5.106	45685	4.309	4.24	41329	3.253	3.2
48026	5.166	5.107	45745	4.309	4.242	41389	3.253	3.201
48086	5.166	5.108	45805	4.309	4.243	41449	3.253	3.202
48146	5.166	5.108	45865	4.309	4.243	41509	3.253	3.203
48206	5.166	5.109	45925	4.309	4.245	41569	3.253	3.203
48266	5.166	5.11	45985	4.309	4.246	41629	3.253	3.203
48326	5.166	5.11	46045	4.309	4.246	41689	3.253	3.204
48386	5.166	5.112	46105	4.309	4.247	41749	3.253	3.204
48446	5.166	5.113	46165	4.309	4.248	41809	3.253	3.205
48506	5.166	5.107	46225	4.309	4.249	41869	3.253	3.205
48566	5.166	4.924	46285	4.308	4.249	41929	3.253	3.206
48626	5.166	4.937	46345	4.309	4.25	41989	3.253	3.206
48686	5.165	4.946	46405	4.309	4.251	42049	3.253	3.207
48746	5.166	4.954	46465	4.309	4.252	42109	3.253	3.207
48806	5.165	4.96	46525	4.309	4.252	42169	3.253	3.208
48866	5.165	4.965	46585	4.309	4.253	42229	3.253	3.208
48926	5.165	4.97	46645	4.309	4.254	42289	3.253	3.209
48986	5.164	4.975	46705	4.309	4.254	42349	3.253	3.209
49046	5.165	4.981	46765	4.309	4.255	42409	3.253	3.209
49106	5.165	4.985	46825	4.309	4.255	42469	3.253	3.209
49166	5.165	4.99	46885	4.309	4.256	42529	3.253	3.21
49226	5.165	4.994	46945	4.309	4.257	42589	3.253	3.21
49286	5.164	4.998	47005	4.309	4.257	42649	3.252	3.211
49346	5.164	5.002	47065	4.309	4.258	42709	3.252	3.211
49406	5.164	5.006	47125	4.308	4.258	42769	3.253	3.212
49466	5.164	5.01	47185	4.308	4.259	42829	3.253	3.212
49526	5.164	5.014	47245	4.309	4.259	42889	3.253	3.213
49586	5.164	5.017	47305	4.309	4.26	42949	3.252	3.213
49646	5.164	5.021	47365	4.309	4.26	43009	3.252	3.213
49706	5.164	5.024	47425	4.309	4.261	43069	3.253	3.214
49766	5.163	5.027	47485	4.309	4.261	43129	3.253	3.214
49826	5.165	5.031	47545	4.309	4.262	43189	3.253	3.214
49886	5.164	5.034	47605	4.309	4.262	43249	3.253	3.215
49946	5.164	5.037	47665	4.309	4.263	43309	3.253	3.215
50006	5.165	5.04	47725	4.308	4.263	43369	3.253	3.215
50066	5.165	5.043	47785	4.309	4.263	43429	3.252	3.216
50126	5.165	5.045	47845	4.309	4.264	43489	3.252	3.216
50186	5.166	5.048	47905	4.309	4.264	43549	3.253	3.216
50246	5.166	5.051	47965	4.309	4.264	43609	3.253	3.217
50306	5.166	5.053	48025	4.309	4.265	43669	3.253	3.217
50366	5.166	5.056	48085	4.309	4.265	43729	3.252	3.217
50426	5.167	5.059	48145	4.309	4.266	43789	3.252	3.218
50486	5.167	5.061	48205	4.309	4.266	43849	3.253	3.218
50546	5.168	5.064	48265	4.309	4.267	43909	3.253	3.218
50606	5.168	5.066	48325	4.309	4.267	43969	3.253	3.218
50666	5.169	5.068	48385	4.308	4.267	44029	3.253	3.218
50726	5.169	5.071	48445	4.308	4.268	44089	3.253	3.218
50786	5.169	5.072	48505	4.309	4.268	44149	3.252	3.219
50846	5.169	5.074	48565	4.309	4.269	44209	3.252	3.219
50906	5.169	5.077	48625	4.309	4.269	44269	3.252	3.219
50966	5.17	5.078	48685	4.309	4.27	44329	3.252	3.219
51026	5.17	5.08	48745	4.309	4.27	44389	3.252	3.22
51086	5.169	5.082	48805	4.309	4.27	44449	3.253	3.22
51146	5.17	5.084	48865	4.309	4.27	44509	3.252	3.221
51206	5.17	5.086	48925	4.309	4.271	44569	3.252	3.221
51266	5.17	5.088	48985	4.309	4.271	44629	3.252	3.221
51326	5.17	5.089	49045	4.309	4.272	44689	3.252	3.221
51386	5.17	5.09	49105	4.308	4.272	44749	3.252	3.221
51446	5.17	5.092	49165	4.309	4.272	44809	3.252	3.221
51506	5.17	5.093	49225	4.309	4.273	44869	3.252	3.222
51566	5.17	5.095	49285	4.309	4.273	44929	3.252	3.221
51626	5.17	5.096	49345	4.309	4.273	44989	3.252	3.222
51686	5.17	5.098	49405	4.309	4.273	45049	3.252	3.222
51746	5.17	5.099	49465	4.308	4.273	45109	3.253	3.223
51806	5.17	5.1	49525	4.309	4.273	45169	3.252	3.223
51866	5.17	5.101	49585	4.309	4.273	45229	3.252	3.223
51926	5.17	5.102	49645	4.309	4.274	45289	3.252	3.223
51986	5.169	5.103	49705	4.309	4.275	45349	3.252	3.223
52046	5.17	5.105	49765	4.309	4.274	45409	3.252	3.224
52106	5.169	5.107	49825	4.309	4.275	45469	3.252	3.224
52166	5.17	5.107	49885	4.309	4.275	45529	3.252	3.224
52226	5.169	5.108	49945	4.308	4.275	45589	3.252	3.224
52286	5.169	5.109	50005	4.309	4.276	45649	3.252	3.225
52346	5.17	5.11	50065	4.309	4.276	45709	3.252	3.224
52406	5.17	5.111	50125	4.308	4.276	45769	3.252	3.225
52466	5.169	5.112	50185	4.309	4.276	45829	3.252	3.225
52526	5.17	5.112	50245	4.309	4.276	45889	3.252	3.225
52586	5.17	5.113	50305	4.309	4.276	45949	3.252	3.226
52646	5.169	5.113	50365	4.309	4.277	46009	3.252	3.226
52706	5.169	5.114	50425	4.309	4.277	46069	3.252	3.226
52766	5.169	5.116	50485	4.309	4.277	46129	3.251	3.226
52826	5.169	5.116	50545	4.308	4.278	46189	3.252	3.226
52886	5.17	5.117	50605	4.309	4.278	46249	3.251	3.226
52946	5.17	5.118	50665	4.308	4.279	46309	3.251	3.226
53006	5.17	5.118	50725	4.309	4.278	46369	3.251	3.227
53066	5.169	5.118	50785	4.308	4.279	46429	3.251	3.227
53126	5.169	5.119	50845	4.309	4.278	46489	3.251	3.226
53186	5.17	5.12	50905	4.308	4.278	46549	3.25	3.227
53246	5.169	5.12	50965	4.308	4.279	46609	3.251	3.227
53306	5.169	5.121	51025	4.308	4.278	46669	3.252	3.227
53366	5.169	5.122	51085	4.308	4.279	46729	3.25	3.227
53426	5.169	5.122	51145	4.309	4.279	46789	3.251	3.227
53486	5.17	5.122	51205	4.308	4.279	46849	3.251	3.227
53546	5.17	5.123	51265	4.309	4.279	46909	3.25	3.227
53606	5.169	5.123	51325	4.308	4.279	46969	3.251	3.227
53666	5.169	5.125	51385	4.308	4.28	47029	3.25	3.227
53762	5.169	5.125	51445	4.308	4.279	47089	3.25	3.227
53822	5.171	5.125	51505	4.308	4.279	47149	3.251	3.227
53882	5.169	5.126	51565	4.308	4.279	47209	3.251	3.227
53942	5.169	5.126	51625	4.308	4.279	47269	3.251	3.227
54002	5.169	5.127	51685	4.308	4.281	47329	3.251	3.228
54062	5.169	5.127	51745	4.308	4.28	47389	3.251	3.227
54122	5.169	5.128	51805	4.308	4.28	47449	3.25	3.227
54182	5.169	5.128	51865	4.309	4.275	47509	3.25	3.228
54242	5.169	5.128	51925	4.308	4.182	47569	3.252	3.228
54302	5.17	5.128	51985	4.308	4.192	47629	3.251	3.228
54362	5.169	5.129	52045	4.308	4.198	47689	3.25	3.228
54422	5.169	5.13	52105	4.308	4.202	47749	3.25	3.228
54482	5.169	5.13	52165	4.308	4.206	47809	3.251	3.228
54542	5.169	5.13	52225	4.308	4.209	47869	3.25	3.228
54602	5.17	5.13	52285	4.307	4.21	47929	3.251	3.228
54662	5.169	5.13	52345	4.308	4.213	47989	3.25	3.228
54722	5.169	5.131	52405	4.309	4.214	48049	3.251	3.229
54782	5.169	5.131	52465	4.308	4.216	48109	3.251	3.229
54842	5.169	5.131	52525	4.308	4.218	48169	3.25	3.229
54902	5.17	5.131	52585	4.309	4.219	48229	3.251	3.229
54962	5.169	5.131	52645	4.308	4.22	48289	3.25	3.229
55022	5.169	5.131	52705	4.308	4.222	48349	3.251	3.229
55082	5.169	5.132	52765	4.308	4.223	48409	3.25	3.23
55142	5.169	5.133	52825	4.309	4.224	48469	3.25	3.23
55202	5.169	5.133	52885	4.309	4.225	48529	3.25	3.229
55262	5.169	5.133	52945	4.309	4.227	48589	3.25	3.229
55322	5.169	5.133	53005	4.308	4.228	48649	3.25	3.229
55382	5.169	5.133	53065	4.309	4.229	48709	3.251	3.23
55442	5.169	5.134	53125	4.308	4.23	48769	3.25	3.23
55502	5.169	5.134	53185	4.309	4.231	48829	3.25	3.229
55562	5.17	5.134	53245	4.309	4.233	48889	3.25	3.23
55622	5.169	5.133	53305	4.308	4.234	48949	3.25	3.228
55682	5.169	5.134	53365	4.309	4.235	49009	3.25	3.155
55742	5.169	5.134	53425	4.309	4.236	49069	3.25	3.161
55802	5.17	5.134	53485	4.309	4.237	49129	3.25	3.167
55862	5.169	5.134	53545	4.309	4.237	49189	3.25	3.164
55922	5.169	5.135	53605	4.309	4.239	49249	3.249	3.165
55982	5.169	5.135	53665	4.309	4.24	49309	3.25	3.171
56042	5.169	5.135	53725	4.309	4.241	49369	3.25	3.176
56102	5.169	5.135	53785	4.309	4.242	49429	3.25	3.178
56162	5.169	5.136	53845	4.309	4.243	49489	3.25	3.179
56222	5.169	5.136	53905	4.309	4.243	49549	3.25	3.181
56282	5.169	5.135	53965	4.309	4.245	49609	3.25	3.182
56342	5.169	5.136	54025	4.309	4.246	49669	3.25	3.184
56402	5.169	5.136	54085	4.309	4.246	49729	3.25	3.185
56462	5.169	5.136	54145	4.309	4.247	49789	3.251	3.185
56522	5.169	5.136	54205	4.309	4.248	49849	3.25	3.185
56582	5.169	5.136	54265	4.309	4.249	49909	3.25	3.187
56642	5.169	5.137	54325	4.309	4.25	49969	3.251	3.187
56702	5.169	5.137	54385	4.309	4.25	50029	3.251	3.188
56762	5.169	5.137	54445	4.309	4.251	50089	3.251	3.189
56822	5.169	5.137	54505	4.309	4.252	50149	3.251	3.19
56882	5.169	5.137	54565	4.308	4.252	50209	3.252	3.191
56942	5.169	5.137	54625	4.309	4.254	50269	3.251	3.191
57002	5.169	5.138	54685	4.309	4.254	50329	3.251	3.192
57062	5.169	5.137	54745	4.309	4.255	50389	3.251	3.192
57122	5.169	5.138	54805	4.309	4.255	50449	3.252	3.194
57182	5.169	5.138	54865	4.309	4.256	50509	3.252	3.194
57242	5.169	5.138	54925	4.309	4.257	50569	3.252	3.194
57302	5.169	5.138	54985	4.309	4.258	50629	3.251	3.195
57362	5.169	5.138	55045	4.309	4.258	50689	3.252	3.195
57422	5.169	5.138	55105	4.309	4.259	50749	3.252	3.196
57482	5.169	5.138	55165	4.308	4.259	50809	3.252	3.197
57542	5.169	5.138	55225	4.309	4.26	50869	3.252	3.197
57602	5.169	5.137	55285	4.309	4.26	50929	3.252	3.198
57662	5.169	5.138	55345	4.309	4.261	50989	3.252	3.198
57722	5.169	5.138	55405	4.309	4.261	51049	3.252	3.199
57782	5.169	5.138	55465	4.309	4.261	51109	3.252	3.2
57842	5.169	5.138	55525	4.309	4.262	51169	3.252	3.2
57902	5.169	5.138	55585	4.309	4.263	51229	3.251	3.2
57962	5.169	5.138	55645	4.309	4.264	51289	3.252	3.2
58022	5.169	5.138	55705	4.309	4.264	51349	3.252	3.201
58082	5.169	5.138	55765	4.309	4.264	51409	3.252	3.201
58142	5.169	5.138	55825	4.309	4.265	51469	3.252	3.203
58202	5.169	5.138	55885	4.309	4.265	51529	3.251	3.203
58262	5.169	5.138	55945	4.309	4.266	51589	3.252	3.203
58322	5.169	5.138	56005	4.309	4.266	51649	3.251	3.203
58382	5.169	5.138	56065	4.309	4.266	51709	3.25	3.204
58442	5.169	5.138	56125	4.309	4.267	51769	3.252	3.204
58502	5.169	5.138	56185	4.309	4.267	51829	3.252	3.204
58562	5.169	5.138	56245	4.309	4.268	51889	3.252	3.205
58622	5.169	5.138	56305	4.309	4.268	51949	3.252	3.205
58682	5.169	5.138	56365	4.309	4.268	52009	3.252	3.206
58742	5.169	5.138	56425	4.309	4.269	52069	3.252	3.206
58802	5.169	5.138	56485	4.309	4.269	52129	3.252	3.206
58862	5.169	5.138	56545	4.309	4.269	52189	3.252	3.207
58922	5.17	5.138	56605	4.308	4.27	52249	3.251	3.208
58982	5.168	5.139	56665	4.309	4.27	52309	3.25	3.208
59042	5.169	5.138	56725	4.309	4.27	52369	3.252	3.208
59102	5.169	5.139	56785	4.309	4.27	52429	3.252	3.208
59162	5.169	5.138	56845	4.308	4.271	52489	3.252	3.209
59222	5.169	5.139	56905	4.309	4.271	52549	3.252	3.209
59282	5.169	5.138	56965	4.309	4.271	52609	3.251	3.209
59342	5.169	5.138	57025	4.308	4.272	52669	3.251	3.209
59402	5.169	5.138	57085	4.309	4.272	52729	3.252	3.21
59462	5.169	5.138	57145	4.309	4.273	52789	3.252	3.21
59522	5.169	5.139	57205	4.309	4.273	52849	3.252	3.21
59582	5.17	5.138	57265	4.308	4.273	52909	3.252	3.211
59642	5.169	5.138	57325	4.309	4.273	52969	3.252	3.211
59702	5.169	5.139	57385	4.309	4.273	53029	3.252	3.211
59762	5.17	5.138	57445	4.308	4.274	53089	3.252	3.212
59822	5.169	5.139	57505	4.309	4.274	53149	3.252	3.212
59882	5.169	5.138	57565	4.309	4.274	53209	3.252	3.212
59942	5.169	5.138	57625	4.309	4.274	53269	3.251	3.212
60002	5.169	5.139	57685	4.309	4.274	53329	3.252	3.213
60062	5.169	5.138	57745	4.309	4.274	53389	3.252	3.214
60122	5.169	5.139	57805	4.309	4.275	53449	3.252	3.213
60182	5.169	5.139	57865	4.308	4.275	53509	3.251	3.214
60242	5.169	5.139	57925	4.309	4.275	53569	3.251	3.214
60302	5.169	5.139	57985	4.308	4.275	53629	3.252	3.214
60362	5.169	5.139	58045	4.308	4.275	53689	3.252	3.215
60422	5.169	5.139	58105	4.308	4.276	53749	3.25	3.215
60482	5.169	5.139	58165	4.308	4.276	53809	3.252	3.215
60542	5.169	5.139	58225	4.309	4.276	53869	3.251	3.216
60602	5.17	5.139	58285	4.309	4.277	53929	3.252	3.216
60662	5.169	5.139	58345	4.308	4.276	53989	3.25	3.217
60722	5.169	5.139	58405	4.308	4.276	54049	3.252	3.217
60782	5.169	5.139	58465	4.308	4.277	54109	3.25	3.216
60842	5.17	5.139	58525	4.308	4.277	54169	3.252	3.217
60902	5.17	5.139	58585	4.308	4.277	54229	3.25	3.218
60962	5.169	5.139	58645	4.308	4.277	54289	3.251	3.218
61022	5.169	5.139	58705	4.308	4.278	54349	3.25	3.218
61082	5.169	5.139	58765	4.309	4.278	54409	3.251	3.218
61142	5.169	5.138	58825	4.308	4.278	54469	3.252	3.218
61202	5.169	5.138	58885	4.308	4.278	54529	3.251	3.218
61262	5.169	5.138	58945	4.308	4.278	54589	3.251	3.219
61322	5.169	5.138	59005	4.309	4.279	54649	3.251	3.219
61382	5.17	5.138	59065	4.308	4.279	54709	3.251	3.219
61442	5.169	5.138	59125	4.308	4.278	54769	3.25	3.219
61502	5.169	5.138	59185	4.308	4.279	54829	3.251	3.219
61562	5.17	5.139	59245	4.309	4.279	54889	3.251	3.22
61622	5.169	5.138	59305	4.309	4.279	54949	3.25	3.221
61682	5.169	5.138	59365	4.308	4.279	55009	3.25	3.22
61742	5.169	5.138	59425	4.308	4.279	55069	3.25	3.22
61802	5.169	5.139	59485	4.308	4.279	55129	3.25	3.221
61862	5.169	5.138	59545	4.308	4.279	55200	3.25	3.221
61922	5.169	5.139	59605	4.308	4.279	55260	3.25	3.221
61982	5.169	5.139	59665	4.309	4.279	55320	3.25	3.221
62042	5.169	5.139	59725	4.308	4.279	55380	3.25	3.221
62102	5.169	5.138	59785	4.308	4.28	55440	3.25	3.221
62162	5.169	5.138	59845	4.307	4.279	55500	3.25	3.222
62222	5.169	5.138	59905	4.308	4.28	55560	3.25	3.222
62282	5.169	5.138	59965	4.308	4.279	55620	3.251	3.222
62342	5.169	5.138	60025	4.308	4.28	55680	3.25	3.222
62402	5.169	5.138	60085	4.308	4.279	55740	3.25	3.223
62462	5.169	5.139	60145	4.306	4.28	55800	3.25	3.223
62522	5.169	5.139	60205	4.309	4.28	55860	3.25	3.223
62582	5.169	5.138	60265	4.308	4.28	55920	3.25	3.223
62642	5.169	5.138	60325	4.307	4.28	55980	3.25	3.223
62702	5.169	5.138	60385	4.306	4.281	56040	3.25	3.223
62762	5.169	5.138	60445	4.308	4.281	56100	3.25	3.224
62822	5.169	5.138	60505	4.308	4.28	56160	3.251	3.224
62882	5.169	5.138	60565	4.308	4.281	56220	3.25	3.223
62942	5.169	5.138	60625	4.308	4.281	56280	3.25	3.224
63002	5.169	5.138	60685	4.308	4.281	56340	3.25	3.224
63062	5.169	5.138	60745	4.307	4.281	56400	3.25	3.224
63122	5.169	5.139	60805	4.307	4.281	56460	3.25	3.225
63182	5.169	5.139	60865	4.308	4.281	56520	3.25	3.224
63242	5.169	5.138	60925	4.308	4.281	56580	3.25	3.224
63302	5.169	5.138	60985	4.308	4.281	56640	3.25	3.225
63362	5.169	5.138	61045	4.307	4.281	56700	3.25	3.225
63422	5.169	5.138	61105	4.308	4.282	56760	3.25	3.225
63482	5.169	5.138	61165	4.306	4.281	56820	3.25	3.225
63542	5.169	5.138	61225	4.307	4.282	56880	3.25	3.225
63602	5.169	5.138	61285	4.307	4.282	56940	3.25	3.226
63662	5.169	5.138	61345	4.308	4.281	57000	3.25	3.226
63722	5.169	5.138	61405	4.307	4.281	57060	3.25	3.226
63782	5.169	5.138	61465	4.307	4.282	57120	3.25	3.225
63842	5.169	5.138	61525	4.308	4.282	57180	3.25	3.225
63902	5.169	5.138	61585	4.307	4.282	57240	3.25	3.226
63962	5.169	5.139	61645	4.307	4.282	57300	3.25	3.226
64022	5.169	5.139	61705	4.308	4.282	57360	3.25	3.226
64082	5.169	5.138	61765	4.308	4.282	57420	3.25	3.226
64142	5.169	5.138	61825	4.307	4.282	57480	3.25	3.226
64202	5.169	5.138	61885	4.307	4.282	57540	3.25	3.226
64262	5.169	5.138	61945	4.307	4.282	57600	3.25	3.227
64322	5.169	5.138	62005	4.306	4.282	57660	3.25	3.227
64382	5.169	5.138	62065	4.307	4.282	57720	3.25	3.227
64442	5.169	5.138	62125	4.307	4.282	57780	3.25	3.227
64502	5.169	5.138	62185	4.307	4.282	57840	3.25	3.227
64562	5.169	5.138	62245	4.307	4.282	57900	3.25	3.227
64622	5.169	5.138	62305	4.308	4.282	57960	3.25	3.227
64682	5.169	5.138	62365	4.307	4.282	58020	3.25	3.227
64742	5.17	5.138	62425	4.307	4.282	58080	3.25	3.227
64802	5.169	5.138	62485	4.307	4.282	58140	3.249	3.227
64862	5.169	5.138	62545	4.307	4.282	58200	3.25	3.227
64922	5.169	5.138	62605	4.307	4.282	58260	3.25	3.227
64982	5.169	5.138	62665	4.306	4.282	58320	3.249	3.227
65042	5.169	5.138	62725	4.307	4.282	58380	3.25	3.227
65102	5.169	5.138	62785	4.308	4.282	58440	3.25	3.227
65162	5.169	5.138	62845	4.307	4.282	58500	3.25	3.227
65222	5.169	5.138	62905	4.307	4.283	58560	3.249	3.227
65282	5.169	5.138	62965	4.307	4.282	58620	3.25	3.227
65342	5.169	5.138	63025	4.306	4.282	58680	3.249	3.227
65402	5.169	5.138	63085	4.307	4.282	58740	3.249	3.227
65462	5.169	5.138	63145	4.307	4.282	58800	3.249	3.228
65522	5.169	5.138	63205	4.307	4.283	58860	3.249	3.228
65582	5.169	5.138	63265	4.307	4.282	58920	3.249	3.228
65642	5.169	5.138	63325	4.306	4.283	58980	3.25	3.228
65702	5.169	5.138	63385	4.306	4.283	59040	3.25	3.228
65762	5.169	5.138	63445	4.307	4.283	59100	3.249	3.228
65822	5.169	5.137	63505	4.306	4.283	59160	3.249	3.228
65882	5.169	5.138	63565	4.306	4.283	59220	3.249	3.228
65942	5.17	5.137	63625	4.306	4.283	59280	3.249	3.228
66002	5.169	5.138	63685	4.306	4.283	59340	3.249	3.228
66062	5.169	5.137	63745	4.306	4.283	59400	3.249	3.229
66122	5.169	5.138	63805	4.306	4.283	59460	3.249	3.229
66182	5.169	5.137	63865	4.306	4.283	59520	3.249	3.229
66242	5.169	5.137	63925	4.307	4.283	59580	3.249	3.229
66302	5.169	5.137	63985	4.306	4.283	59640	3.25	3.229
66362	5.169	5.138	64045	4.306	4.283	59700	3.249	3.229
66422	5.169	5.137	64105	4.306	4.284	59760	3.249	3.229
66482	5.169	5.138	64165	4.306	4.283	59820	3.249	3.229
66542	5.169	5.138	64225	4.306	4.283	59880	3.249	3.229
66602	5.169	5.137	64285	4.306	4.284	59940	3.249	3.229
66662	5.169	5.137	64345	4.306	4.283	60000	3.249	3.229
66722	5.169	5.137	64405	4.306	4.284	60060	3.249	3.228
66782	5.169	5.137	64465	4.306	4.283	60120	3.25	3.228
66842	5.169	5.138	64525	4.306	4.283	60180	3.249	3.23
66902	5.169	5.137	64585	4.306	4.274	60240	3.249	3.23
66962	5.169	5.137	64645	4.306	4.256	60300	3.249	3.23
67022	5.169	5.137	64705	4.306	4.192	60360	3.249	3.23
67082	5.169	5.137	64765	4.306	4.203	60420	3.249	3.23
67142	5.169	5.137	64825	4.306	4.209	60480	3.248	3.23
67202	5.169	5.137	64885	4.306	4.214	60540	3.249	3.23
67262	5.169	5.137	64945	4.306	4.216	60600	3.249	3.23
67322	5.169	5.137	65005	4.306	4.219	60660	3.249	3.23
67382	5.169	5.138	65065	4.306	4.221	60720	3.248	3.23
67442	5.169	5.137	65125	4.306	4.223	60780	3.248	3.23
67502	5.169	5.137	65185	4.306	4.224	60840	3.248	3.23
67562	5.168	5.137	65245	4.306	4.225	60900	3.249	3.23
67622	5.169	5.137	65305	4.306	4.227	60960	3.249	3.23
67682	5.169	5.137	65365	4.307	4.228	61020	3.249	3.23
67742	5.169	5.137	65425	4.306	4.229	61080	3.249	3.23
67802	5.169	5.137	65485	4.307	4.231	61140	3.248	3.23
67862	5.169	5.137	65545	4.307	4.232	61200	3.248	3.23
67922	5.169	5.137	65605	4.306	4.233	61260	3.249	3.23
67982	5.169	5.138	65665	4.307	4.234	61320	3.248	3.23
68042	5.169	5.137	65725	4.307	4.235	61380	3.248	3.23
68102	5.168	5.137	65785	4.308	4.236	61440	3.248	3.23
68162	5.168	5.137	65845	4.308	4.237	61500	3.248	3.23
68222	5.168	5.137	65905	4.307	4.238	61560	3.248	3.23
68282	5.169	5.137	65965	4.308	4.239	61620	3.249	3.231
68342	5.169	5.137	66025	4.308	4.24	61680	3.248	3.231
68402	5.169	5.137	66085	4.308	4.24	61740	3.248	3.231
68462	5.168	5.137	66145	4.309	4.242	61800	3.248	3.231
68522	5.168	5.138	66205	4.308	4.242	61860	3.249	3.231
68582	5.169	5.137	66265	4.308	4.243	61920	3.248	3.231
68642	5.169	5.137	66325	4.307	4.243	61980	3.248	3.231
68702	5.169	5.137	66385	4.309	4.245	62040	3.248	3.231
68762	5.169	5.137	66445	4.308	4.245	62100	3.249	3.231
68822	5.169	5.138	66505	4.308	4.246	62160	3.248	3.231
68882	5.169	5.137	66565	4.308	4.247	62220	3.248	3.231
68942	5.169	5.137	66625	4.306	4.248	62280	3.249	3.231
69002	5.168	5.138	66685	4.308	4.248	62340	3.249	3.231
69062	5.168	5.138	66745	4.308	4.249	62400	3.248	3.231
69122	5.169	5.137	66805	4.308	4.25	62460	3.248	3.231
69182	5.168	5.138	66865	4.308	4.251	62520	3.248	3.231
69242	5.168	5.138	66925	4.308	4.251	62580	3.248	3.231
69302	5.168	5.138	66985	4.309	4.252	62640	3.248	3.231
69362	5.169	5.138	67045	4.308	4.252	62700	3.248	3.231
69422	5.169	5.138	67105	4.308	4.253	62760	3.248	3.231
69482	5.169	5.138	67165	4.309	4.254	62820	3.248	3.231
69542	5.169	5.137	67225	4.308	4.254	62880	3.248	3.231
69602	5.168	5.137	67285	4.308	4.255	62940	3.248	3.231
69662	5.169	5.137	67345	4.308	4.255	63000	3.248	3.231
69722	5.169	5.137	67405	4.308	4.256	63060	3.247	3.231
69782	5.169	5.138	67465	4.309	4.256	63120	3.248	3.231
69842	5.168	5.137	67525	4.309	4.257	63180	3.247	3.231
69902	5.169	5.137	67585	4.309	4.258	63240	3.248	3.23
69962	5.169	5.137	67645	4.308	4.258	63300	3.248	3.231
70022	5.169	5.137	67705	4.308	4.259	63360	3.248	3.231
70082	5.168	5.137	67765	4.309	4.259	63420	3.247	3.231
70142	5.168	5.137	67825	4.308	4.26	63480	3.247	3.231
70202	5.169	5.137	67885	4.309	4.261	63540	3.247	3.231
70262	5.169	5.137	67945	4.308	4.261	63600	3.248	3.232
70322	5.169	5.138	68005	4.308	4.261	63660	3.248	3.232
70382	5.169	5.137	68065	4.308	4.263	63720	3.247	3.231
70442	5.17	5.137	68125	4.308	4.262	63780	3.248	3.231
70502	5.17	5.138	68185	4.308	4.263	63840	3.247	3.232
70562	5.171	5.137	68245	4.308	4.263	63900	3.248	3.231
70622	5.171	5.138	68305	4.309	4.264	63960	3.247	3.232
70682	5.172	5.138	68365	4.308	4.264	64020	3.247	3.231
70742	5.172	5.138	68425	4.308	4.264	64080	3.248	3.231
70802	5.172	5.139	68485	4.308	4.265	64140	3.248	3.232
70862	5.173	5.138	68545	4.309	4.265	64200	3.247	3.231
70922	5.173	5.138	68605	4.309	4.265	64260	3.247	3.231
70982	5.173	5.139	68665	4.309	4.266	64320	3.247	3.231
71042	5.174	5.139	68725	4.309	4.266	64380	3.247	3.231
71102	5.174	5.139	68785	4.308	4.266	64440	3.247	3.231
71162	5.174	5.139	68845	4.308	4.267	64500	3.247	3.231
71222	5.175	5.139	68905	4.309	4.267	64560	3.247	3.231
71282	5.175	5.139	68965	4.308	4.267	64620	3.247	3.232
71342	5.175	5.139	69025	4.309	4.268	64680	3.247	3.232
71402	5.175	5.139	69085	4.309	4.268	64740	3.247	3.232
71462	5.175	5.139	69145	4.309	4.269	64800	3.247	3.232
71522	5.176	5.14	69205	4.309	4.269	64860	3.247	3.232
71582	5.175	5.14	69265	4.309	4.269	64920	3.247	3.232
71642	5.175	5.14	69325	4.308	4.27	64980	3.247	3.232
71702	5.175	5.14	69385	4.308	4.27	65040	3.247	3.231
71762	5.176	5.14	69445	4.308	4.27	65100	3.247	3.232
71822	5.175	5.14	69505	4.308	4.27	65160	3.247	3.231
71882	5.174	5.14	69565	4.308	4.27	65220	3.247	3.232
71942	5.175	5.14	69625	4.309	4.271	65280	3.247	3.232
72002	5.175	5.141	69685	4.308	4.271	65340	3.247	3.232
72062	5.175	5.14	69745	4.308	4.272	65400	3.247	3.232
72122	5.175	5.14	69805	4.309	4.272	65460	3.247	3.232
72182	5.175	5.141	69865	4.308	4.272	65520	3.247	3.231
72242	5.175	5.141	69925	4.308	4.273	65580	3.247	3.231
72302	5.175	5.14	69985	4.308	4.273	65640	3.247	3.231
72362	5.175	5.141	70045	4.309	4.272	65700	3.247	3.231
72422	5.175	5.141	70105	4.308	4.273	65760	3.247	3.232
72482	5.174	5.141	70165	4.309	4.273	65820	3.247	3.232
72542	5.175	5.141	70225	4.309	4.273	65880	3.248	3.232
72602	5.175	5.142	70285	4.309	4.273	65940	3.247	3.231
72662	5.174	5.142	70345	4.309	4.274	66000	3.247	3.232
72722	5.175	5.142	70405	4.309	4.274	66060	3.247	3.232
72782	5.175	5.142	70465	4.309	4.274	66120	3.247	3.232
72842	5.175	5.142	70525	4.31	4.274	66180	3.247	3.232
72902	5.175	5.142	70585	4.31	4.274	66240	3.247	3.232
72962	5.175	5.142	70645	4.311	4.275	66300	3.247	3.232
73022	5.175	5.142	70705	4.312	4.275	66360	3.247	3.232
73082	5.174	5.142	70765	4.312	4.276	66420	3.247	3.232
73142	5.175	5.142	70825	4.312	4.276	66480	3.247	3.232
73202	5.175	5.142	70885	4.312	4.276	66540	3.247	3.232
73262	5.175	5.142	70945	4.312	4.276	66600	3.247	3.231
73322	5.175	5.143	71005	4.313	4.276	66660	3.247	3.232
73382	5.175	5.143	71065	4.313	4.276	66720	3.247	3.232
73442	5.175	5.143	71125	4.314	4.277	66780	3.247	3.232
73502	5.174	5.143	71185	4.314	4.277	66840	3.247	3.232
73562	5.174	5.143	71245	4.315	4.277	66900	3.247	3.232
73622	5.174	5.143	71305	4.315	4.278	66960	3.247	3.232
73682	5.175	5.143	71365	4.316	4.278	67020	3.247	3.232
73742	5.175	5.143	71425	4.316	4.278	67080	3.247	3.232
73802	5.174	5.143	71485	4.317	4.279	67140	3.247	3.232
73862	5.175	5.143	71545	4.317	4.279	67200	3.247	3.232
73922	5.174	5.143	71605	4.318	4.279	67260	3.247	3.231
73982	5.174	5.143	71665	4.318	4.279	67320	3.247	3.231
74042	5.175	5.143	71725	4.318	4.279	67380	3.247	3.231
74102	5.174	5.143	71785	4.318	4.28	67440	3.247	3.232
74162	5.175	5.143	71845	4.318	4.28	67500	3.247	3.231
74222	5.174	5.143	71905	4.32	4.281	67560	3.247	3.232
74282	5.175	5.143	71965	4.32	4.281	67620	3.247	3.232
74342	5.174	5.143	72025	4.321	4.281	67680	3.248	3.232
74402	5.175	5.143	72085	4.321	4.282	67740	3.247	3.232
74462	5.175	5.143	72145	4.322	4.282	67800	3.247	3.232
74522	5.175	5.143	72205	4.322	4.282	67860	3.247	3.232
74582	5.175	5.144	72265	4.322	4.282	67920	3.247	3.232
74642	5.174	5.143	72325	4.323	4.283	67980	3.247	3.232
74702	5.175	5.143	72385	4.324	4.283	68040	3.247	3.232
74762	5.174	5.143	72445	4.324	4.283	68100	3.247	3.232
74822	5.174	5.143	72505	4.324	4.283	68160	3.247	3.232
74882	5.174	5.143	72565	4.324	4.284	68220	3.246	3.233
74942	5.174	5.143	72625	4.325	4.284	68280	3.247	3.232
75002	5.174	5.143	72685	4.325	4.285	68340	3.247	3.232
75062	5.174	5.143	72745	4.325	4.285	68400	3.247	3.232
75122	5.174	5.143	72805	4.326	4.285	68460	3.247	3.233
75182	5.174	5.144	72865	4.326	4.286	68520	3.247	3.232
75242	5.174	5.143	72925	4.326	4.286	68580	3.246	3.232
75302	5.174	5.143	72985	4.327	4.287	68640	3.246	3.232
75362	5.174	5.143	73045	4.327	4.287	68700	3.247	3.232
75422	5.175	5.143	73105	4.328	4.287	68760	3.246	3.232
75482	5.174	5.143	73165	4.328	4.288	68820	3.247	3.232
75542	5.174	5.143	73225	4.329	4.288	68880	3.246	3.231
75602	5.174	5.143	73285	4.328	4.288	68940	3.247	3.231
75662	5.174	5.143	73345	4.329	4.288	69000	3.247	3.232
75722	5.174	5.143	73405	4.329	4.289	69060	3.246	3.232
75782	5.174	5.143	73465	4.328	4.281	69120	3.247	3.232
75842	5.173	5.143	73525	4.328	4.19	69180	3.247	3.232
75902	5.174	5.143	73585	4.328	4.198	69240	3.246	3.232
75962	5.173	5.143	73645	4.328	4.204	69300	3.246	3.232
76022	5.174	5.143	73705	4.328	4.208	69360	3.246	3.232
76082	5.174	5.143	73765	4.328	4.21	69420	3.247	3.232
76142	5.173	5.143	73825	4.328	4.213	69480	3.247	3.232
76202	5.173	5.143	73885	4.328	4.215	69540	3.247	3.232
76262	5.173	5.143	73945	4.328	4.218	69600	3.246	3.232
76322	5.173	5.143	74005	4.327	4.219	69660	3.247	3.232
76382	5.173	5.143	74065	4.328	4.221	69720	3.247	3.232
76442	5.173	5.143	74125	4.328	4.223	69780	3.247	3.231
76502	5.173	5.143	74185	4.328	4.225	69840	3.247	3.232
76562	5.174	5.144	74245	4.328	4.226	69900	3.247	3.232
76622	5.174	5.143	74305	4.328	4.228	69960	3.247	3.231
76682	5.173	5.143	74365	4.328	4.229	70020	3.246	3.232
76742	5.173	5.144	74425	4.328	4.231	70080	3.246	3.231
76802	5.173	5.143	74485	4.328	4.233	70140	3.246	3.232
76862	5.173	5.144	74545	4.328	4.234	70200	3.246	3.232
76922	5.173	5.143	74605	4.328	4.235	70260	3.246	3.232
76982	5.173	5.143	74665	4.328	4.237	70320	3.247	3.231
77042	5.174	5.143	74725	4.327	4.238	70380	3.246	3.232
77102	5.173	5.143	74785	4.328	4.24	70440	3.246	3.231
77162	5.173	5.143	74845	4.328	4.242	70500	3.246	3.232
77222	5.173	5.143	74905	4.327	4.242	70560	3.246	3.232
77282	5.173	5.143	74965	4.327	4.243	70620	3.246	3.232
77342	5.173	5.143	75025	4.327	4.245	70680	3.246	3.232
77402	5.173	5.143	75085	4.328	4.246	70740	3.246	3.232
77462	5.174	5.143	75145	4.327	4.247	70800	3.246	3.232
77522	5.173	5.143	75205	4.328	4.248	70860	3.247	3.232
77582	5.173	5.143	75265	4.328	4.249	70920	3.246	3.232
77642	5.173	5.143	75325	4.327	4.25	70980	3.246	3.232
77702	5.174	5.143	75385	4.328	4.251	71040	3.247	3.232
77762	5.173	5.143	75445	4.327	4.252	71100	3.246	3.232
77822	5.173	5.143	75505	4.327	4.253	71160	3.246	3.232
77882	5.173	5.143	75565	4.327	4.255	71220	3.246	3.232
77942	5.173	5.143	75625	4.328	4.255	71280	3.246	3.232
78002	5.173	5.143	75685	4.328	4.257	71340	3.246	3.232
78062	5.173	5.143	75745	4.328	4.258	71400	3.247	3.231
78122	5.173	5.143	75805	4.327	4.258	71460	3.246	3.231
78182	5.173	5.143	75865	4.328	4.259	71520	3.246	3.231
78242	5.172	5.143	75925	4.328	4.26	71580	3.246	3.232
78302	5.172	5.143	75985	4.327	4.261	71640	3.246	3.231
78362	5.172	5.143	76045	4.327	4.261	71700	3.246	3.231
78422	5.173	5.143	76105	4.328	4.262	71760	3.245	3.231
78482	5.173	5.143	76165	4.328	4.264	71820	3.246	3.231
78542	5.173	5.144	76225	4.327	4.264	71880	3.245	3.232
78602	5.173	5.144	76285	4.328	4.265	71940	3.246	3.232
78662	5.174	5.144	76345	4.327	4.265	72000	3.246	3.232
78722	5.173	5.144	76405	4.327	4.266	72060	3.246	3.232
78782	5.172	5.144	76465	4.327	4.267	72120	3.246	3.231
78842	5.172	5.143	76525	4.327	4.268	72180	3.246	3.232
78902	5.173	5.143	76585	4.328	4.269	72240	3.246	3.231
78962	5.172	5.143	76645	4.327	4.269	72300	3.246	3.232
79022	5.172	5.143	76705	4.327	4.27	72360	3.245	3.232
79082	5.172	5.143	76765	4.328	4.27	72420	3.246	3.232
79142	5.172	5.143	76825	4.327	4.272	72480	3.246	3.231
79202	5.172	5.143	76885	4.328	4.273	72540	3.246	3.231
79262	5.173	5.143	76945	4.327	4.273	72600	3.246	3.232
79322	5.173	5.143	77005	4.327	4.273	72660	3.246	3.231
79382	5.173	5.143	77065	4.327	4.273	72720	3.246	3.232
79442	5.173	5.143	77125	4.327	4.274	72780	3.245	3.231
79502	5.173	5.143	77185	4.327	4.275	72840	3.246	3.232
79562	5.172	5.143	77245	4.327	4.275	72900	3.246	3.232
79622	5.172	5.143	77305	4.327	4.276	72960	3.246	3.232
79682	5.172	5.143	77365	4.327	4.277	73020	3.245	3.232
79742	5.172	5.143	77425	4.327	4.277	73080	3.246	3.232
79802	5.172	5.143	77485	4.327	4.278	73140	3.245	3.231
79862	5.172	5.143	77545	4.326	4.278	73200	3.246	3.232
79922	5.172	5.143	77605	4.327	4.279	73260	3.246	3.231
79982	5.172	5.143	77665	4.327	4.279	73320	3.246	3.231
80042	5.172	5.143	77725	4.327	4.279	73380	3.246	3.231
80102	5.172	5.143	77785	4.327	4.28	73440	3.245	3.232
80162	5.172	5.143	77845	4.326	4.281	73500	3.246	3.232
80222	5.172	5.143	77905	4.327	4.282	73560	3.246	3.232
80282	5.172	5.143	77965	4.327	4.282	73620	3.246	3.231
80342	5.172	5.143	78025	4.327	4.282	73680	3.246	3.231
80402	5.171	5.143	78085	4.327	4.282	73740	3.245	3.231
80462	5.172	5.143	78145	4.327	4.283	73800	3.245	3.231
80522	5.171	5.143	78205	4.327	4.283	73860	3.246	3.231
80582	5.172	5.143	78265	4.326	4.284	73920	3.246	3.232
80642	5.172	5.143	78325	4.326	4.284	73980	3.246	3.231
80702	5.172	5.143	78385	4.327	4.285	74040	3.246	3.231
80762	5.172	5.143	78445	4.326	4.285	74100	3.245	3.232
80822	5.172	5.143	78505	4.326	4.285	74160	3.246	3.231
80882	5.172	5.143	78565	4.326	4.286	74220	3.246	3.231
80942	5.172	5.143	78625	4.326	4.286	74280	3.246	3.231
81002	5.172	5.143	78685	4.326	4.287	74340	3.244	3.231
81062	5.172	5.143	78745	4.326	4.287	74400	3.246	3.231
81122	5.172	5.143	78805	4.326	4.288	74460	3.246	3.231
81182	5.172	5.143	78865	4.326	4.288	74520	3.246	3.231
81242	5.172	5.143	78925	4.326	4.288	74580	3.246	3.231
81302	5.172	5.143	78985	4.326	4.288	74640	3.245	3.231
81362	5.172	5.143	79045	4.326	4.288	74700	3.245	3.231
81422	5.172	5.143	79105	4.326	4.289	74760	3.246	3.231
81482	5.172	5.143	79165	4.326	4.289	74820	3.246	3.231
81542	5.172	5.143	79225	4.326	4.29	74880	3.245	3.231
81602	5.172	5.143	79285	4.325	4.29	74940	3.245	3.231
81662	5.172	5.143	79345	4.326	4.29	75000	3.246	3.232
81722	5.172	5.143	79405	4.326	4.291	75060	3.245	3.231
81782	5.172	5.143	79465	4.325	4.29	75120	3.246	3.231
81842	5.171	5.143	79525	4.326	4.291	75180	3.245	3.231
81902	5.172	5.143	79585	4.326	4.291	75240	3.245	3.232
81962	5.172	5.143	79645	4.325	4.291	75300	3.246	3.231
82022	5.172	5.143	79705	4.326	4.291	75360	3.245	3.231
82082	5.172	5.143	79765	4.326	4.291	75420	3.245	3.231
82142	5.172	5.143	79825	4.326	4.291	75480	3.245	3.232
82202	5.172	5.143	79885	4.325	4.292	75540	3.245	3.231
82262	5.172	5.143	79945	4.326	4.291	75600	3.246	3.231
82322	5.172	5.143	80005	4.326	4.292	75660	3.245	3.231
82382	5.172	5.143	80065	4.325	4.292	75720	3.245	3.231
82442	5.172	5.143	80125	4.326	4.293	75780	3.245	3.231
82502	5.172	5.143	80185	4.325	4.293	75840	3.245	3.231
82562	5.172	5.143	80245	4.326	4.293	75900	3.245	3.231
82622	5.171	5.143	80305	4.326	4.293	75960	3.245	3.232
82682	5.172	5.143	80365	4.326	4.294	76020	3.246	3.231
82742	5.171	5.143	80425	4.325	4.294	76080	3.244	3.231
82802	5.171	5.143	80485	4.325	4.294	76140	3.245	3.231
82862	5.172	5.143	80545	4.325	4.294	76200	3.245	3.231
82922	5.172	5.143	80605	4.325	4.294	76260	3.246	3.231
83055	5.172	5.143	80665	4.325	4.295	76320	3.245	3.232
83115	5.172	5.143	80725	4.325	4.288	76380	3.245	3.231
83175	5.172	5.143	80785	4.321	4.117	76440	3.245	3.232
83235	5.172	5.138	80845	4.321	4.131	76500	3.245	3.231
83295	5.171	4.917	80905	4.321	4.142	76560	3.245	3.231
83355	5.172	4.93	80965	4.321	4.149	76620	3.245	3.231
83415	5.17	4.94	81025	4.321	4.153	76680	3.246	3.231
83475	5.17	4.948	81085	4.321	4.158	76740	3.245	3.231
83535	5.17	4.954	81145	4.321	4.162	76800	3.245	3.231
83595	5.169	4.96	81205	4.321	4.165	76860	3.245	3.231
83655	5.17	4.966	81265	4.321	4.168	76920	3.246	3.231
83715	5.169	4.971	81325	4.321	4.171	76980	3.246	3.231
83775	5.17	4.976	81385	4.321	4.174	77040	3.246	3.231
83835	5.169	4.981	81445	4.321	4.177	77100	3.245	3.231
83895	5.17	4.986	81505	4.322	4.179	77160	3.245	3.231
83955	5.17	4.99	81565	4.321	4.181	77220	3.245	3.231
84015	5.169	4.996	81625	4.321	4.184	77280	3.245	3.231
84075	5.17	4.999	81685	4.321	4.187	77340	3.245	3.231
84135	5.169	5.004	81745	4.321	4.189	77400	3.245	3.231
84195	5.169	5.008	81805	4.321	4.191	77460	3.245	3.231
84255	5.169	5.012	81865	4.321	4.193	77520	3.245	3.231
84315	5.169	5.015	81925	4.321	4.195	77580	3.245	3.231
84375	5.169	5.019	81985	4.321	4.198	77640	3.245	3.231
84435	5.169	5.023	82045	4.321	4.199	77700	3.245	3.231
84495	5.169	5.026	82105	4.321	4.201	77760	3.245	3.231
84555	5.169	5.03	82165	4.321	4.204	77820	3.245	3.231
84615	5.169	5.033	82225	4.321	4.205	77880	3.245	3.231
84675	5.169	5.036	82285	4.321	4.207	77940	3.245	3.231
84735	5.169	5.04	82345	4.322	4.21	78000	3.245	3.231
84795	5.169	5.042	82405	4.322	4.211	78060	3.245	3.23
84855	5.169	5.045	82465	4.321	4.212	78120	3.246	3.231
84915	5.169	5.048	82525	4.321	4.214	78180	3.245	3.231
84975	5.168	5.05	82585	4.321	4.216	78240	3.244	3.232
85035	5.169	5.053	82645	4.321	4.217	78300	3.245	3.231
85095	5.169	5.056	82705	4.321	4.219	78360	3.245	3.231
85155	5.169	5.059	82765	4.321	4.22	78420	3.245	3.231
85215	5.169	5.061	82825	4.321	4.222	78480	3.245	3.231
85275	5.168	5.063	82885	4.321	4.223	78540	3.245	3.231
85335	5.169	5.066	82945	4.321	4.225	78600	3.245	3.231
85395	5.168	5.068	83005	4.321	4.227	78660	3.244	3.231
85455	5.169	5.071	83065	4.321	4.228	78720	3.245	3.231
85515	5.168	5.072	83125	4.321	4.229	78780	3.244	3.231
85575	5.168	5.074	83185	4.321	4.23	78840	3.244	3.231
85635	5.168	5.077	83245	4.321	4.232	78900	3.245	3.231
85695	5.168	5.078	83305	4.321	4.233	78960	3.245	3.23
85755	5.168	5.08	83365	4.321	4.234	79020	3.245	3.23
85815	5.169	5.082	83425	4.321	4.236	79080	3.245	3.23
85875	5.168	5.083	83485	4.321	4.237	79140	3.245	3.231
85935	5.167	5.085	83545	4.321	4.238	79200	3.245	3.231
85995	5.168	5.086	83605	4.321	4.239	79260	3.245	3.231
86055	5.166	5.089	83665	4.321	4.24	79320	3.245	3.231
86115	5.168	5.09	83725	4.321	4.241	79380	3.245	3.231
86175	5.168	5.091	83785	4.321	4.242	79440	3.244	3.231
86235	5.168	5.093	83845	4.321	4.243	79500	3.244	3.23
86295	5.167	5.094	83905	4.321	4.245	79560	3.244	3.23
86355	5.166	5.095	83965	4.321	4.246	79620	3.245	3.23
86415	5.166	5.097	84025	4.321	4.246	79680	3.245	3.231
86475	5.166	5.098	84085	4.321	4.248	79740	3.245	3.231
86535	5.167	5.1	84145	4.321	4.249	79800	3.245	3.231
86595	5.167	5.101	84205	4.321	4.249	79860	3.244	3.231
86655	5.167	5.101	84265	4.321	4.251	79920	3.245	3.231
86715	5.167	5.102	84325	4.321	4.251	79980	3.245	3.231
86775	5.166	5.104	84385	4.321	4.252	80040	3.244	3.231
86835	5.167	5.104	84445	4.321	4.254	80100	3.245	3.231
86895	5.167	5.106	84505	4.321	4.254	80160	3.245	3.231
86955	5.168	5.107	84565	4.321	4.255	80220	3.244	3.231
87015	5.167	5.108	84625	4.321	4.255	80280	3.245	3.23
87075	5.167	5.108	84685	4.321	4.256	80340	3.244	3.231
87135	5.166	5.109	84745	4.321	4.257	80400	3.244	3.23
87195	5.166	5.11	84805	4.321	4.258	80460	3.244	3.231
87255	5.167	5.111	84865	4.321	4.259	80520	3.244	3.231
87315	5.167	5.112	84925	4.321	4.26	80580	3.245	3.23
87375	5.167	5.113	84985	4.321	4.26	80640	3.244	3.23
87435	5.166	5.114	85045	4.321	4.261	80700	3.245	3.23
87495	5.166	5.114	85105	4.321	4.261	80760	3.245	3.23
87555	5.166	5.116	85165	4.321	4.263	80820	3.244	3.23
87615	5.168	5.116	85225	4.321	4.263	80880	3.244	3.23
87675	5.168	5.116	85285	4.321	4.264	80940	3.244	3.231
87735	5.168	5.117	85345	4.321	4.264	81000	3.244	3.231
87795	5.169	5.118	85405	4.321	4.264	81060	3.244	3.231
87855	5.169	5.118	85465	4.32	4.265	81120	3.245	3.231
87915	5.17	5.119	85525	4.32	4.266	81180	3.244	3.23
87975	5.17	5.12	85585	4.32	4.267	81240	3.244	3.231
88035	5.17	5.121	85645	4.321	4.267	81300	3.244	3.231
88095	5.172	5.122	85705	4.321	4.268	81360	3.244	3.23
88155	5.171	5.122	85765	4.32	4.269	81420	3.244	3.231
88215	5.172	5.113	85825	4.321	4.269	81480	3.245	3.23
88275	5.171	4.977	85885	4.321	4.27	81540	3.244	3.231
88335	5.172	4.938	85945	4.32	4.27	81600	3.245	3.23
88395	5.171	4.948	86005	4.32	4.271	81660	3.244	3.23
88455	5.172	4.956	86065	4.32	4.272	81720	3.244	3.23
88515	5.172	4.963	86125	4.32	4.272	81780	3.244	3.23
88575	5.172	4.968	86185	4.32	4.273	81840	3.244	3.231
88635	5.173	4.974	86245	4.32	4.273	81900	3.244	3.23
88695	5.173	4.981	86305	4.319	4.273	81960	3.244	3.231
88755	5.174	4.984	86365	4.32	4.274	82020	3.244	3.231
88815	5.173	4.989	86425	4.318	4.275	82080	3.244	3.231
88875	5.172	4.994	86485	4.32	4.274	82140	3.244	3.23
88935	5.173	4.999	86545	4.32	4.275	82200	3.244	3.23
88995	5.172	5.003	86605	4.32	4.276	82260	3.244	3.23
89055	5.173	5.008	86665	4.32	4.276	82320	3.244	3.23
89115	5.172	5.011	86725	4.32	4.276	82380	3.244	3.23
89175	5.172	5.015	86785	4.32	4.277	82440	3.244	3.23
89235	5.172	5.02	86845	4.32	4.277	82500	3.244	3.23
89295	5.172	5.023	86905	4.32	4.277	82560	3.244	3.231
89355	5.172	5.026	86965	4.319	4.278	82620	3.244	3.23
89415	5.172	5.03	87025	4.319	4.278	82680	3.244	3.23
89475	5.172	5.034	87085	4.32	4.279	82740	3.244	3.23
89535	5.172	5.037	87145	4.32	4.279	82800	3.244	3.231
89595	5.172	5.04	87205	4.319	4.279	82860	3.244	3.23
89655	5.172	5.043	87265	4.319	4.279	82920	3.244	3.231
89715	5.172	5.047	87325	4.32	4.279	82980	3.245	3.23
89775	5.172	5.05	87385	4.319	4.28	83040	3.244	3.23
89835	5.171	5.053	87445	4.319	4.28	83100	3.244	3.23
89895	5.172	5.055	87505	4.319	4.28	83160	3.244	3.23
89955	5.171	5.058	87565	4.319	4.281	83220	3.245	3.23
90015	5.171	5.06	87625	4.319	4.281	83280	3.244	3.231
90075	5.172	5.063	87685	4.319	4.282	83340	3.244	3.231
90135	5.172	5.065	87745	4.319	4.282	83400	3.245	3.231
90195	5.172	5.068	87805	4.319	4.282	83460	3.244	3.231
90255	5.172	5.071	87865	4.318	4.282	83520	3.244	3.231
90315	5.171	5.073	87925	4.318	4.282	83580	3.244	3.231
90375	5.17	5.074	87985	4.318	4.283	83640	3.244	3.231
90435	5.171	5.076	88045	4.318	4.283	83700	3.244	3.23
90495	5.17	5.079	88105	4.318	4.283	83760	3.244	3.23
90555	5.17	5.081	88165	4.318	4.284	83820	3.244	3.23
90615	5.17	5.083	88225	4.318	4.284	83880	3.244	3.23
90675	5.169	5.085	88285	4.319	4.284	83940	3.244	3.23
90735	5.17	5.086	88345	4.319	4.284	84000	3.244	3.23
90795	5.17	5.088	88405	4.318	4.285	84060	3.244	3.23
90855	5.17	5.09	88465	4.318	4.285	84120	3.244	3.23
90915	5.17	5.092	88525	4.318	4.285	84180	3.245	3.23
90975	5.171	5.093	88585	4.318	4.285	84240	3.244	3.231
91035	5.17	5.095	88645	4.319	4.279	84300	3.244	3.231
91095	5.17	5.096	88705	4.318	4.167	84360	3.244	3.231
91155	5.169	5.098	88765	4.318	4.177	84420	3.244	3.231
91215	5.17	5.098	88825	4.318	4.184	84480	3.244	3.23
91275	5.17	5.1	88885	4.317	4.189	84540	3.244	3.231
91335	5.17	5.101	88945	4.318	4.192	84600	3.244	3.23
91395	5.169	5.103	89005	4.318	4.195	84660	3.244	3.23
91455	5.17	5.104	89065	4.318	4.198	84720	3.244	3.23
91515	5.169	5.105	89125	4.318	4.2	84780	3.244	3.23
91575	5.17	5.106	89185	4.318	4.202	84840	3.244	3.23
91635	5.17	5.107	89245	4.318	4.204	84900	3.244	3.23
91695	5.17	5.109	89305	4.318	4.207	84960	3.244	3.23
91755	5.17	5.11	89365	4.318	4.209	85020	3.244	3.231
91815	5.17	5.111	89425	4.318	4.21	85080	3.244	3.23
91875	5.17	5.112	89485	4.318	4.212	85140	3.244	3.23
91935	5.17	5.111	89545	4.318	4.213	85200	3.245	3.23
91995	5.169	5.095	89605	4.318	4.215	85260	3.244	3.23
92055	5.168	4.903	89665	4.318	4.217	85320	3.244	3.158
92115	5.169	4.921	89725	4.318	4.218	85380	3.244	3.163
92175	5.169	4.933	89785	4.318	4.22	85440	3.244	3.167
92235	5.169	4.942	89845	4.318	4.222	85500	3.244	3.171
92295	5.168	4.948	89905	4.318	4.223	85560	3.244	3.173
92355	5.168	4.954	89965	4.318	4.225	85620	3.244	3.174
92415	5.167	4.96	90025	4.318	4.225	85680	3.244	3.176
92475	5.168	4.966	90085	4.318	4.227	85740	3.244	3.176
92535	5.168	4.972	90145	4.318	4.229	85800	3.244	3.177
92595	5.167	4.977	90205	4.318	4.23	85860	3.244	3.178
92655	5.168	4.982	90265	4.318	4.231	85920	3.244	3.179
92715	5.168	4.986	90325	4.319	4.232	85980	3.244	3.18
92775	5.167	4.991	90385	4.318	4.234	86040	3.244	3.181
92835	5.166	4.996	90445	4.318	4.235	86100	3.244	3.181
92895	5.166	5	90505	4.318	4.236	86160	3.244	3.182
92955	5.167	5.005	90565	4.318	4.237	86220	3.244	3.182
93015	5.166	5.008	90625	4.318	4.238	86280	3.244	3.183
93075	5.166	5.012	90685	4.32	4.239	86340	3.244	3.184
93135	5.166	5.016	90745	4.318	4.241	86400	3.244	3.185
93195	5.166	5.02	90805	4.318	4.242	86460	3.244	3.185
93255	5.166	5.023	90865	4.318	4.243	86520	3.244	3.186
93315	5.166	5.027	90925	4.318	4.244	86580	3.244	3.186
93375	5.166	5.031	90985	4.318	4.246	86640	3.244	3.187
93435	5.166	5.034	91045	4.318	4.246	86700	3.244	3.188
93495	5.166	5.037	91105	4.318	4.247	86760	3.244	3.188
93555	5.166	5.041	91165	4.318	4.248	86820	3.245	3.189
93615	5.166	5.043	91225	4.318	4.249	86880	3.244	3.189
93675	5.166	5.046	91285	4.318	4.25	86940	3.244	3.19
93735	5.166	5.05	91345	4.319	4.251	87000	3.244	3.191
93795	5.166	5.052	91405	4.318	4.251	87060	3.244	3.191
93855	5.166	5.055	91465	4.318	4.252	87120	3.244	3.192
93915	5.166	5.057	91525	4.319	4.253	87180	3.244	3.193
93975	5.166	5.059	91585	4.318	4.254	87240	3.244	3.193
94035	5.165	5.062	91645	4.318	4.255	87300	3.244	3.194
94095	5.165	5.064	91705	4.318	4.256	87360	3.244	3.194
94155	5.166	5.067	91765	4.318	4.256	87420	3.244	3.194
94215	5.166	5.069	91825	4.318	4.257	87480	3.244	3.195
94275	5.165	5.071	91885	4.318	4.258	87540	3.244	3.196
94335	5.166	5.073	91945	4.318	4.259	87600	3.244	3.196
94395	5.166	5.075	92005	4.318	4.26	87660	3.244	3.196
94455	5.166	5.077	92065	4.318	4.26	87720	3.244	3.197
94515	5.168	5.079	92125	4.318	4.261	87780	3.244	3.197
94575	5.168	5.081	92185	4.318	4.262	87840	3.244	3.197
94635	5.168	5.082	92245	4.318	4.263	87900	3.244	3.198
94695	5.168	5.084	92305	4.318	4.264	87960	3.244	3.199
94755	5.169	5.086	92365	4.318	4.264	88020	3.244	3.199
94815	5.169	5.088	92425	4.318	4.264	88080	3.244	3.2
94875	5.169	5.089	92485	4.318	4.265	88140	3.244	3.2
94935	5.17	5.091	92545	4.318	4.266	88200	3.244	3.2
94995	5.17	5.093	92605	4.318	4.266	88260	3.244	3.2
95055	5.17	5.094	92665	4.318	4.267	88320	3.244	3.201
95115	5.17	5.095	92725	4.318	4.267	88380	3.244	3.201
95175	5.171	5.098	92785	4.318	4.268	88440	3.244	3.202
95235	5.171	5.099	92845	4.318	4.268	88500	3.244	3.203
95295	5.17	5.1	92905	4.318	4.269	88560	3.244	3.203
95355	5.17	5.101	92965	4.318	4.27	88620	3.244	3.203
95415	5.17	5.102	93025	4.318	4.27	88680	3.244	3.203
95475	5.17	5.104	93085	4.318	4.27	88740	3.245	3.204
95535	5.17	5.104	93145	4.318	4.27	88800	3.244	3.204
95595	5.17	5.106	93205	4.318	4.271	88860	3.244	3.205
95655	5.17	5.107	93265	4.318	4.272	88920	3.244	3.205
95715	5.171	5.109	93325	4.318	4.272	88980	3.244	3.205
95775	5.17	5.11	93385	4.317	4.273	89040	3.244	3.206
95835	5.17	5.111	93445	4.318	4.273	89100	3.244	3.206
95895	5.172	5.112	93505	4.318	4.273	89160	3.244	3.206
95955	5.17	5.113	93565	4.318	4.274	89220	3.244	3.207
96015	5.17	5.113	93625	4.317	4.274	89280	3.244	3.207
96075	5.17	5.114	93685	4.318	4.275	89340	3.244	3.207
96135	5.171	5.115	93745	4.318	4.275	89400	3.244	3.208
96195	5.17	5.116	93805	4.318	4.276	89460	3.244	3.209
96255	5.17	5.116	93865	4.317	4.276	89520	3.244	3.208
96315	5.17	5.118	93925	4.318	4.276	89580	3.244	3.209
96375	5.17	5.118	93985	4.318	4.277	89640	3.244	3.209
96435	5.17	5.119	94045	4.316	4.277	89700	3.244	3.209
96495	5.17	5.12	94105	4.318	4.277	89760	3.244	3.21
96555	5.17	5.12	94165	4.318	4.278	89820	3.244	3.21
96615	5.17	5.121	94225	4.317	4.278	89880	3.244	3.21
96675	5.17	5.121	94285	4.317	4.278	89940	3.244	3.211
96735	5.17	5.115	94345	4.318	4.279	90000	3.244	3.211
96795	5.17	5.075	94405	4.317	4.279	90060	3.243	3.212
96855	5.169	4.942	94465	4.317	4.279	90120	3.244	3.212
96915	5.169	4.952	94525	4.317	4.279	90180	3.242	3.212
96975	5.169	4.96	94585	4.317	4.279	90240	3.244	3.212
97035	5.17	4.966	94645	4.317	4.281	90300	3.244	3.212
97095	5.169	4.972	94705	4.317	4.281	90360	3.243	3.212
97155	5.169	4.978	94765	4.317	4.281	90420	3.244	3.213
97215	5.169	4.983	94825	4.318	4.281	90480	3.243	3.212
97275	5.169	4.987	94885	4.317	4.281	90540	3.244	3.214
97335	5.169	4.993	94945	4.317	4.282	90600	3.243	3.214
97395	5.169	4.997	95005	4.317	4.282	90660	3.244	3.214
97455	5.169	5.002	95065	4.317	4.282	90720	3.243	3.214
97515	5.169	5.006	95125	4.317	4.282	90780	3.244	3.215
97575	5.169	5.011	95185	4.317	4.282	90840	3.243	3.215
97635	5.168	5.014	95245	4.318	4.283	90900	3.243	3.215
97695	5.169	5.019	95305	4.317	4.283	90960	3.243	3.215
97755	5.169	5.023	95365	4.317	4.284	91020	3.244	3.216
97815	5.168	5.026	95425	4.317	4.283	91080	3.242	3.216
97875	5.168	5.03	95485	4.318	4.284	91140	3.242	3.216
97935	5.169	5.033	95545	4.318	4.284	91200	3.243	3.216
97995	5.168	5.037	95605	4.318	4.284	91260	3.244	3.217
98055	5.169	5.04	95665	4.318	4.285	91320	3.244	3.217
98115	5.168	5.044	95725	4.319	4.285	91380	3.243	3.217
98175	5.168	5.047	95785	4.319	4.285	91440	3.243	3.217
98235	5.168	5.05	95845	4.32	4.285	91500	3.243	3.218
98295	5.168	5.052	95905	4.321	4.286	91560	3.243	3.218
98355	5.168	5.055	95965	4.321	4.286	91620	3.244	3.218
98415	5.168	5.058	96025	4.321	4.287	91680	3.244	3.218
98475	5.168	5.061	96085	4.321	4.286	91740	3.244	3.218
98535	5.166	5.063	96145	4.322	4.287	91800	3.244	3.218
98595	5.167	5.065	96265	4.322	4.287	91860	3.244	3.218
98655	5.168	5.068	96325	4.324	4.287	91920	3.243	3.218
98715	5.168	5.07	96385	4.324	4.288	91980	3.243	3.218
98775	5.168	5.072	96445	4.324	4.288	92040	3.243	3.219
98835	5.168	5.075	96505	4.324	4.288	92100	3.243	3.219
98895	5.168	5.077	96565	4.324	4.289	92160	3.242	3.219
98955	5.168	5.079	96625	4.325	4.289	92220	3.244	3.219
99015	5.167	5.081	96685	4.324	4.29	92280	3.243	3.219
99075	5.167	5.083	96745	4.325	4.29	92340	3.242	3.22
99135	5.167	5.085	96805	4.325	4.29	92400	3.244	3.22
99195	5.167	5.086	96865	4.326	4.29	92460	3.243	3.221
99255	5.167	5.089	96925	4.325	4.291	92520	3.242	3.221
99315	5.167	5.09	96985	4.326	4.291	92580	3.244	3.221
99375	5.167	5.092	97045	4.326	4.291	92640	3.244	3.221
99435	5.167	5.093	97105	4.326	4.291	92700	3.242	3.221
99495	5.167	5.094	97165	4.326	4.292	92760	3.243	3.221
99555	5.167	5.096	97225	4.327	4.292	92820	3.242	3.221
99615	5.168	5.098	97285	4.326	4.292	92880	3.243	3.221
99675	5.168	5.098	97345	4.326	4.292	92940	3.244	3.221
99735	5.166	5.1	97405	4.327	4.293	93000	3.243	3.222
99795	5.167	5.101	97465	4.327	4.293	93060	3.242	3.221
99855	5.168	5.102	97525	4.327	4.294	93120	3.242	3.222
99915	5.166	5.104	97585	4.326	4.293	93180	3.242	3.222
99975	5.167	5.105	97645	4.327	4.294	93240	3.243	3.222
100035	5.166	5.107	97705	4.326	4.294	93300	3.242	3.222
100095	5.166	5.107	97765	4.327	4.294	93360	3.243	3.222
100155	5.166	5.108	97825	4.327	4.294	93420	3.243	3.223
100215	5.167	5.109	97885	4.326	4.294	93480	3.242	3.222
100275	5.167	5.11	97945	4.326	4.294	93540	3.242	3.223
100335	5.167	5.111	98005	4.326	4.295	93600	3.243	3.223
100395	5.167	5.112	98065	4.327	4.295	93660	3.243	3.223
100455	5.167	5.113	98125	4.326	4.295	93720	3.242	3.223
100515	5.167	5.114	98185	4.327	4.295	93780	3.242	3.223
100575	5.167	5.115	98245	4.327	4.295	93840	3.242	3.224
100635	5.166	5.116	98305	4.326	4.296	93900	3.243	3.224
100695	5.167	5.116	98365	4.326	4.296	93960	3.243	3.224
100755	5.167	5.117	98425	4.326	4.295	94020	3.242	3.224
100815	5.166	5.118	98485	4.326	4.296	94080	3.242	3.224
100875	5.168	5.118	98545	4.326	4.296	94140	3.242	3.225
100935	5.166	5.119	98605	4.326	4.296	94200	3.242	3.224
100995	5.166	5.12	98665	4.326	4.297	94260	3.243	3.224
101055	5.168	5.121	98725	4.326	4.297	94320	3.242	3.224
101115	5.167	5.122	98785	4.326	4.297	94380	3.243	3.224
101175	5.167	5.122	98845	4.326	4.297	94440	3.242	3.224
101235	5.166	5.122	98905	4.326	4.297	94500	3.242	3.224
101295	5.168	5.123	98965	4.326	4.297	94560	3.242	3.224
101355	5.166	5.125	99025	4.325	4.297	94620	3.242	3.224
101415	5.166	5.125	99085	4.326	4.298	94680	3.242	3.224
101475	5.167	5.125	99145	4.326	4.297	94740	3.243	3.224
101535	5.167	5.125	99205	4.326	4.298	94800	3.242	3.224
101595	5.168	5.126	99265	4.325	4.298	94860	3.242	3.224
101655	5.167	5.127	99325	4.325	4.298	94920	3.242	3.224
101715	5.167	5.127	99385	4.325	4.298	94980	3.242	3.225
101775	5.168	5.128	99445	4.325	4.299	95040	3.242	3.225
101835	5.167	5.128	99505	4.325	4.298	95100	3.242	3.226
101895	5.167	5.128	99565	4.326	4.299	95160	3.242	3.225
101955	5.167	5.129	99625	4.326	4.299	95220	3.242	3.226
102015	5.167	5.129	99685	4.325	4.299	95280	3.242	3.226
102075	5.168	5.129	99745	4.325	4.299	95340	3.242	3.226
102135	5.166	5.13	99805	4.325	4.299	95400	3.242	3.226
102195	5.167	5.13	99865	4.325	4.299	95460	3.242	3.226
102255	5.166	5.131	99925	4.325	4.299	95520	3.242	3.225
102315	5.168	5.131	99985	4.325	4.299	95580	3.242	3.225
102375	5.168	5.131	100045	4.324	4.3	95640	3.242	3.226
102435	5.166	5.132	100105	4.325	4.3	95700	3.242	3.226
102495	5.167	5.132	100165	4.325	4.3	95760	3.242	3.226
102555	5.167	5.132	100225	4.324	4.3	95820	3.242	3.226
102615	5.167	5.133	100285	4.325	4.3	95880	3.242	3.226
102675	5.166	5.133	100345	4.325	4.3	95940	3.242	3.226
102735	5.167	5.133	100405	4.325	4.3	96000	3.242	3.226
102795	5.167	5.134	100465	4.325	4.3	96060	3.242	3.226
102855	5.167	5.134	100525	4.325	4.3	96120	3.244	3.226
102915	5.166	5.134	100585	4.325	4.3	96180	3.242	3.226
102975	5.166	5.134	100645	4.325	4.3	96240	3.243	3.227
103035	5.168	5.134	100705	4.325	4.3	96300	3.242	3.226
103095	5.166	5.134	100765	4.325	4.3	96360	3.242	3.227
103155	5.167	5.135	100825	4.325	4.3	96420	3.242	3.227
103215	5.167	5.136	100885	4.325	4.3	96480	3.242	3.226
103275	5.168	5.135	100945	4.325	4.3	96540	3.242	3.227
103335	5.168	5.136	101005	4.325	4.3	96600	3.242	3.213
103395	5.168	5.136	101065	4.324	4.3	96660	3.241	3.188
103455	5.168	5.136	101125	4.325	4.3	96720	3.243	3.198
103515	5.167	5.136	101185	4.324	4.3	96780	3.242	3.204
103575	5.167	5.137	101245	4.324	4.3	96840	3.242	3.208
103635	5.167	5.136	101305	4.324	4.301	96900	3.242	3.209
103695	5.167	5.137	101365	4.324	4.301	96960	3.242	3.212
103755	5.168	5.137	101425	4.325	4.3	97020	3.242	3.212
103815	5.167	5.137	101485	4.324	4.301	97080	3.242	3.213
103875	5.168	5.137	101545	4.324	4.301	97140	3.242	3.214
103935	5.168	5.137	101605	4.324	4.301	97200	3.242	3.214
103995	5.168	5.137	101665	4.324	4.301	97260	3.243	3.214
104055	5.168	5.137	101725	4.324	4.3	97320	3.244	3.215
104115	5.167	5.138	101785	4.324	4.3	97380	3.243	3.216
104175	5.168	5.138	101845	4.324	4.301	97440	3.244	3.215
104235	5.168	5.138	101905	4.324	4.301	97500	3.244	3.216
104295	5.168	5.138	101965	4.324	4.301	97560	3.244	3.216
104355	5.168	5.138	102025	4.325	4.301	97620	3.244	3.216
104415	5.168	5.139	102085	4.324	4.301	97680	3.244	3.216
104475	5.168	5.139	102145	4.324	4.301	97740	3.244	3.217
104535	5.168	5.139	102205	4.324	4.301	97800	3.244	3.216
104595	5.168	5.139	102265	4.324	4.301	97860	3.244	3.217
104655	5.169	5.139	102325	4.324	4.301	97920	3.245	3.217
104715	5.168	5.139	102385	4.324	4.301	97980	3.244	3.217
104775	5.168	5.139	102445	4.324	4.301	98040	3.244	3.218
104835	5.168	5.139	102505	4.324	4.302	98100	3.245	3.218
104895	5.168	5.139	102565	4.324	4.301	98160	3.245	3.218
104955	5.169	5.139	102625	4.324	4.301	98220	3.245	3.218
105015	5.168	5.139	102685	4.325	4.301	98280	3.245	3.218
105075	5.168	5.14	102745	4.324	4.301	98340	3.245	3.218
105135	5.168	5.14	102805	4.324	4.301	98400	3.245	3.218
105195	5.168	5.14	102865	4.324	4.301	98460	3.245	3.218
105255	5.168	5.14	102925	4.324	4.302	98520	3.245	3.218
105315	5.169	5.14	102985	4.324	4.302	98580	3.244	3.219
105375	5.168	5.14	103045	4.324	4.302	98640	3.244	3.219
105435	5.168	5.14	103105	4.324	4.302	98700	3.245	3.219
105495	5.168	5.14	103165	4.324	4.302	98760	3.245	3.219
105555	5.168	5.14	103225	4.323	4.301	98820	3.245	3.219
105615	5.168	5.14	103285	4.324	4.302	98880	3.245	3.219
105675	5.169	5.14	103345	4.324	4.302	98940	3.245	3.219
105735	5.168	5.14	103405	4.324	4.302	99000	3.246	3.219
105795	5.168	5.14	103465	4.324	4.302	99060	3.245	3.22
105855	5.168	5.14	103525	4.324	4.302	99120	3.245	3.219
105915	5.168	5.14	103585	4.324	4.302	99180	3.245	3.22
105975	5.168	5.141	103645	4.324	4.302	99240	3.245	3.22
106035	5.168	5.14	103705	4.324	4.301	99300	3.246	3.22
106095	5.168	5.14	103765	4.323	4.302	99360	3.245	3.221
106155	5.169	5.141	103825	4.324	4.302	99420	3.245	3.221
106215	5.169	5.141	103885	4.322	4.302	99480	3.245	3.221
106275	5.168	5.14	103945	4.324	4.302	99540	3.245	3.221
106335	5.168	5.141	104005	4.324	4.302	99600	3.246	3.221
106395	5.168	5.14	104065	4.323	4.302	99660	3.245	3.221
106455	5.169	5.14	104125	4.323	4.302	99720	3.245	3.221
106515	5.168	5.141	104185	4.324	4.302	99780	3.245	3.221
106575	5.169	5.141	104245	4.323	4.301	99840	3.246	3.221
106635	5.169	5.141	104305	4.324	4.302	99900	3.245	3.221
106695	5.168	5.14	104365	4.323	4.302	99960	3.245	3.221
106755	5.169	5.142	104425	4.324	4.301	100020	3.246	3.221
106815	5.169	5.141	104485	4.324	4.301	100080	3.246	3.222
106875	5.169	5.141	104545	4.323	4.302	100140	3.246	3.221
106935	5.169	5.142	104605	4.323	4.302	100200	3.246	3.221
106995	5.169	5.141	104665	4.323	4.301	100260	3.246	3.221
107055	5.169	5.142	104725	4.322	4.302	100320	3.245	3.221
107115	5.169	5.141	104785	4.322	4.301	100380	3.246	3.221
107175	5.169	5.141	104845	4.322	4.301	100440	3.246	3.221
107235	5.169	5.141	104905	4.322	4.302	100500	3.245	3.222
107295	5.169	5.141	104965	4.324	4.301	100560	3.246	3.221
107355	5.169	5.141	105025	4.322	4.301	100620	3.245	3.222
107415	5.169	5.141	105085	4.323	4.302	100680	3.246	3.221
107475	5.169	5.141	105145	4.323	4.301	100740	3.246	3.222
107535	5.169	5.142	105205	4.322	4.302	100800	3.246	3.222
107595	5.169	5.142	105265	4.322	4.302	100860	3.246	3.222
107655	5.169	5.142	105325	4.323	4.302	100920	3.245	3.222
107715	5.169	5.142	105385	4.322	4.302	100980	3.246	3.222
107775	5.169	5.142	105445	4.322	4.301	101040	3.245	3.222
107835	5.168	5.141	105505	4.322	4.301	101100	3.246	3.222
107895	5.169	5.141	105565	4.322	4.302	101160	3.246	3.222
107955	5.169	5.141	105625	4.322	4.301	101220	3.246	3.223
108015	5.168	5.13	105685	4.322	4.302	101280	3.246	3.223
108075	5.168	4.898	105745	4.322	4.302	101340	3.245	3.223
108135	5.168	4.914	105805	4.322	4.301	101400	3.246	3.223
108195	5.168	4.924	105865	4.322	4.301	101460	3.246	3.223
108255	5.168	4.933	105925	4.322	4.302	101520	3.245	3.223
108315	5.168	4.94	105985	4.322	4.301	101580	3.246	3.223
108375	5.168	4.947	106045	4.321	4.301	101640	3.245	3.223
108435	5.168	4.953	106105	4.322	4.301	101700	3.246	3.223
108495	5.167	4.959	106165	4.321	4.302	101760	3.246	3.223
108555	5.168	4.964	106225	4.322	4.301	101820	3.246	3.223
108615	5.168	4.97	106285	4.322	4.302	101880	3.246	3.223
108675	5.168	4.975	106345	4.322	4.301	101940	3.246	3.224
108735	5.167	4.98	106405	4.322	4.301	102000	3.246	3.224
108795	5.166	4.985	106465	4.321	4.301	102060	3.246	3.224
108855	5.166	4.989	106525	4.321	4.301	102120	3.246	3.224
108915	5.166	4.994	106585	4.321	4.301	102180	3.246	3.224
108975	5.166	4.999	106645	4.322	4.301	102240	3.245	3.224
109035	5.166	5.003	106705	4.321	4.301	102300	3.246	3.224
109095	5.166	5.008	106765	4.321	4.301	102360	3.246	3.224
109155	5.166	5.011	106825	4.321	4.301	102420	3.246	3.224
109215	5.166	5.015	106885	4.322	4.301	102480	3.246	3.224
109275	5.166	5.019	106945	4.322	4.302	102540	3.246	3.224
109335	5.166	5.023	107005	4.322	4.301	102600	3.247	3.224
109395	5.166	5.026	107065	4.322	4.301	102660	3.245	3.224
109455	5.167	5.03	107125	4.323	4.301	102720	3.245	3.225
109515	5.167	5.033	107185	4.323	4.301	102780	3.246	3.225
109575	5.166	5.037	107245	4.324	4.302	102840	3.246	3.225
109635	5.166	5.04	107305	4.324	4.301	102900	3.245	3.225
109695	5.166	5.043	107365	4.324	4.302	102960	3.246	3.225
109755	5.166	5.046	107425	4.324	4.302	103020	3.246	3.226
109815	5.166	5.049	107485	4.324	4.302	103080	3.246	3.225
109875	5.166	5.051	107545	4.324	4.302	103140	3.245	3.225
109935	5.166	5.054	107605	4.324	4.301	103200	3.245	3.226
109995	5.166	5.057	107665	4.324	4.302	103260	3.246	3.225
110055	5.166	5.059	107725	4.324	4.302	103320	3.245	3.225
110115	5.166	5.062	107785	4.324	4.302	103380	3.246	3.225
110175	5.166	5.064	107845	4.324	4.302	103440	3.246	3.225
110235	5.166	5.067	107905	4.324	4.302	103500	3.245	3.225
110295	5.166	5.068	107965	4.324	4.302	103560	3.246	3.226
110355	5.165	5.071	108025	4.324	4.302	103620	3.245	3.226
110415	5.166	5.072	108085	4.324	4.302	103680	3.246	3.226
110475	5.166	5.075	108145	4.324	4.302	103740	3.246	3.226
110535	5.166	5.077	108205	4.324	4.302	103800	3.245	3.226
110595	5.166	5.08	108265	4.324	4.302	103860	3.245	3.226
110655	5.166	5.081	108325	4.324	4.302	103920	3.245	3.226
110715	5.165	5.083	108385	4.324	4.302	103980	3.245	3.226
110775	5.166	5.084	108445	4.324	4.302	104040	3.245	3.226
110835	5.166	5.086	108505	4.324	4.302	104100	3.245	3.226
110895	5.166	5.088	108565	4.324	4.302	104160	3.245	3.226
110955	5.165	5.089	108625	4.324	4.303	104220	3.245	3.226
111015	5.165	5.091	108685	4.324	4.302	104280	3.245	3.226
111075	5.165	5.092	108745	4.324	4.303	104340	3.245	3.226
111135	5.166	5.094	108805	4.324	4.302	104400	3.245	3.227
111195	5.166	5.095	108865	4.324	4.302	104460	3.245	3.226
111255	5.166	5.096	108925	4.324	4.303	104520	3.245	3.226
111315	5.166	5.098	108985	4.324	4.302	104580	3.245	3.227
111375	5.165	5.099	109045	4.324	4.302	104640	3.245	3.227
111435	5.166	5.1	109105	4.324	4.302	104700	3.245	3.226
111495	5.166	5.102	109165	4.324	4.302	104760	3.244	3.226
111555	5.166	5.103	109225	4.323	4.303	104820	3.245	3.227
111615	5.166	5.104	109285	4.323	4.303	104880	3.246	3.227
111675	5.166	5.105	109345	4.324	4.303	104940	3.245	3.227
111735	5.166	5.107	109405	4.322	4.303	105000	3.245	3.227
111795	5.165	5.107	109465	4.324	4.303	105060	3.246	3.227
111855	5.166	5.108	109525	4.323	4.303	105120	3.245	3.227
111915	5.165	5.109	109585	4.323	4.303	105180	3.245	3.227
111975	5.166	5.11	109645	4.324	4.303	105240	3.245	3.227
112035	5.166	5.111	109705	4.324	4.303	105300	3.246	3.227
112095	5.166	5.112	109765	4.324	4.303	105360	3.244	3.227
112155	5.165	5.113	109825	4.323	4.303	105420	3.245	3.227
112215	5.165	5.113	109885	4.323	4.303	105480	3.244	3.227
112275	5.165	5.114	109945	4.323	4.303	105540	3.245	3.227
112335	5.166	5.115	110005	4.323	4.303	105600	3.245	3.227
112395	5.166	5.116	110065	4.324	4.302	105660	3.245	3.227
112455	5.165	5.116	110125	4.323	4.303	105720	3.244	3.227
112515	5.166	5.117	110185	4.324	4.303	105780	3.244	3.227
112575	5.166	5.118	110245	4.323	4.303	105840	3.244	3.227
112635	5.165	5.118	110305	4.324	4.303	105900	3.245	3.227
112695	5.165	5.119	110365	4.323	4.303	105960	3.245	3.227
112755	5.165	5.12	110425	4.323	4.303	106020	3.245	3.227
112815	5.165	5.12	110485	4.323	4.303	106080	3.245	3.227
112875	5.166	5.121	110545	4.324	4.303	106140	3.244	3.227
112935	5.166	5.121	110605	4.324	4.303	106200	3.244	3.227
112995	5.166	5.122	110665	4.323	4.303	106260	3.244	3.227
113055	5.166	5.122	110725	4.323	4.303	106320	3.244	3.227
113115	5.166	5.122	110785	4.322	4.303	106380	3.244	3.227
113175	5.166	5.123	110845	4.324	4.302	106440	3.244	3.227
113235	5.165	5.123	110905	4.322	4.302	106500	3.244	3.227
113295	5.166	5.124	110965	4.323	4.303	106560	3.244	3.227
113355	5.165	5.125	111025	4.323	4.303	106620	3.244	3.228
113415	5.165	5.125	111085	4.323	4.303	106680	3.244	3.228
113475	5.166	5.125	111145	4.323	4.303	106740	3.244	3.228
113535	5.165	5.126	111205	4.322	4.302	106800	3.244	3.228
113595	5.166	5.127	111265	4.322	4.302	106860	3.244	3.227
113655	5.166	5.127	111325	4.323	4.303	106920	3.244	3.228
113715	5.165	5.127	111385	4.322	4.303	106980	3.244	3.228
113775	5.166	5.127	111445	4.322	4.302	107040	3.245	3.228
113835	5.166	5.128	111505	4.322	4.303	107100	3.245	3.229
113895	5.166	5.128	111565	4.322	4.303	107160	3.244	3.228
113955	5.165	5.128	111625	4.323	4.303	107220	3.244	3.228
114015	5.165	5.128	111685	4.323	4.303	107280	3.244	3.228
114075	5.165	5.129	111745	4.322	4.302	107340	3.244	3.228
114135	5.166	5.129	111805	4.322	4.302	107400	3.244	3.228
114195	5.166	5.13	111865	4.322	4.303	107460	3.244	3.229
114255	5.166	5.13	111925	4.322	4.302	107520	3.244	3.228
114315	5.166	5.13	111985	4.321	4.302	107580	3.244	3.228
114375	5.166	5.131	112045	4.322	4.303	107640	3.244	3.229
114435	5.166	5.131	112105	4.322	4.302	107700	3.244	3.229
114495	5.165	5.131	112165	4.322	4.302	107760	3.244	3.229
114555	5.166	5.131	112225	4.322	4.302	107820	3.244	3.229
114615	5.165	5.117	112285	4.322	4.302	107880	3.244	3.229
114675	5.165	4.909	112345	4.322	4.302	107940	3.244	3.229
114735	5.165	4.921	112405	4.322	4.302	108000	3.244	3.229
114795	5.165	4.932	112465	4.322	4.303	108060	3.244	3.228
114855	5.164	4.939	112525	4.322	4.302	108120	3.244	3.229
114915	5.165	4.945	112585	4.321	4.302	108180	3.244	3.228
114975	5.165	4.952	112645	4.321	4.302	108240	3.244	3.229
115035	5.164	4.957	112705	4.322	4.302	108300	3.244	3.229
115095	5.164	4.963	112765	4.322	4.301	108360	3.244	3.229
115155	5.164	4.969	112825	4.322	4.301	108420	3.244	3.23
115215	5.164	4.974	112885	4.322	4.302	108480	3.244	3.229
115275	5.164	4.978	112945	4.322	4.302	108540	3.244	3.229
115335	5.163	4.983	113005	4.322	4.302	108600	3.244	3.23
115395	5.164	4.988	113065	4.321	4.302	108660	3.244	3.229
115455	5.163	4.993	113125	4.322	4.302	108720	3.243	3.23
115515	5.164	4.997	113185	4.321	4.302	108780	3.243	3.229
115575	5.163	5.001	113245	4.322	4.301	108840	3.244	3.23
115635	5.164	5.005	113305	4.322	4.301	108900	3.244	3.23
115695	5.163	5.009	113365	4.322	4.301	108960	3.244	3.229
115755	5.163	5.014	113425	4.321	4.301	109020	3.244	3.229
115815	5.163	5.017	113485	4.321	4.302	109080	3.244	3.229
115875	5.163	5.02	113545	4.322	4.302	109140	3.243	3.23
115935	5.164	5.023	113605	4.321	4.301	109200	3.244	3.23
115995	5.163	5.027	113665	4.321	4.302	109260	3.244	3.229
116055	5.164	5.031	113725	4.321	4.301	109320	3.244	3.154
116115	5.163	5.034	113785	4.321	4.302	109380	3.244	3.159
116175	5.163	5.037	113845	4.321	4.301	109440	3.244	3.163
116235	5.163	5.041	113905	4.321	4.301	109500	3.244	3.166
116295	5.163	5.042	113965	4.321	4.301	109560	3.244	3.168
116355	5.163	5.046	114025	4.322	4.301	109620	3.244	3.17
116415	5.163	5.048	114085	4.321	4.301	109680	3.244	3.172
116475	5.162	5.051	114145	4.322	4.301	109740	3.244	3.173
116535	5.163	5.053	114205	4.321	4.301	109800	3.244	3.173
116595	5.163	5.056	114265	4.321	4.3	109860	3.244	3.174
116655	5.163	5.059	114325	4.321	4.301	109920	3.244	3.176
116715	5.162	5.06	114385	4.321	4.301	109980	3.244	3.176
116775	5.163	5.064	114445	4.321	4.301	110040	3.244	3.177
116835	5.163	5.066	114505	4.321	4.301	110100	3.244	3.178
116895	5.163	5.068	114565	4.321	4.3	110160	3.244	3.179
116955	5.163	5.07	114625	4.321	4.301	110220	3.244	3.179
117015	5.162	5.072	114685	4.321	4.301	110280	3.243	3.18
117075	5.163	5.074	114745	4.321	4.3	110340	3.244	3.181
117135	5.163	5.076	114805	4.321	4.3	110400	3.244	3.182
117195	5.162	5.078	114865	4.321	4.301	110460	3.244	3.182
117255	5.162	5.079	114925	4.321	4.301	110520	3.244	3.183
117315	5.162	5.08	114985	4.321	4.3	110580	3.244	3.183
117375	5.162	5.082	115045	4.321	4.301	110640	3.244	3.185
117435	5.162	5.084	115105	4.321	4.3	110700	3.244	3.185
117495	5.162	5.086	115165	4.321	4.3	110760	3.244	3.185
117555	5.162	5.087	115225	4.321	4.301	110820	3.244	3.187
117615	5.163	5.089	115285	4.321	4.3	110880	3.244	3.187
117675	5.162	5.089	115345	4.321	4.301	110940	3.244	3.188
117735	5.162	5.091	115405	4.321	4.301	111000	3.244	3.189
117795	5.162	5.092	115465	4.321	4.301	111060	3.244	3.189
117855	5.162	5.094	115525	4.321	4.301	111120	3.244	3.19
117915	5.162	5.095	115585	4.321	4.3	111180	3.244	3.19
117975	5.162	5.096	115645	4.321	4.3	111240	3.244	3.191
118035	5.161	5.098	115705	4.321	4.3	111300	3.244	3.191
118095	5.162	5.099	115765	4.321	4.301	111360	3.244	3.191
118155	5.162	5.099	115825	4.321	4.3	111420	3.244	3.192
118215	5.162	5.101	115885	4.321	4.3	111480	3.244	3.193
118275	5.161	5.102	115945	4.321	4.3	111540	3.244	3.194
118335	5.162	5.103	116005	4.321	4.301	111600	3.244	3.194
118395	5.161	5.104	116065	4.321	4.3	111660	3.244	3.194
118455	5.162	5.104	116125	4.321	4.3	111720	3.244	3.194
118515	5.161	5.105	116185	4.321	4.3	111780	3.244	3.195
118575	5.162	5.106	116245	4.32	4.3	111840	3.243	3.195
118635	5.162	5.107	116305	4.321	4.3	111900	3.244	3.196
118695	5.163	5.108	116365	4.32	4.3	111960	3.244	3.197
118755	5.162	5.109	116425	4.321	4.3	112020	3.244	3.197
118815	5.163	5.11	116485	4.32	4.3	112080	3.244	3.198
118875	5.164	5.11	116545	4.32	4.3	112140	3.244	3.198
118935	5.165	5.111	116605	4.32	4.3	112200	3.244	3.199
118995	5.165	5.112	116665	4.321	4.3	112260	3.244	3.199
[truncated: 4,061 more rows]

## Sheet: 5(b)
Time	Strain (4MPa pore pressure)	Time	Strain (3MPa)	Time	Strain (5MPa)
100	0	0	0	10	0
110	-35	30	-47	14	0
120	-38	60	-59	44	0
150	50	90	-19	74	0
180	124	120	22	104	0
210	203	150	48	134	100
240	279	180	76	164	175
270	343	210	107	194	222
300	388	240	134	224	264
330	388	270	164	254	303
360	406	300	189	284	340
390	421	330	214	314	370
420	432	360	235	344	397
450	440	390	256	374	417
480	445	420	273	404	436
510	448	450	289	434	444
540	451	480	302	464	462
570	453	510	300	494	472
600	455	540	268	524	477
630	455	570	296	554	483
660	458	600	296	584	487
690	458	630	304	614	490
720	460	660	311	644	495
750	460	690	316	674	495
780	460	720	320	704	497
810	461	750	323	734	499
840	462	780	326	764	473
870	462	810	328	794	482
900	462	840	329	824	488
930	462	870	331	854	508
960	463	900	332	884	511
990	464	930	333	914	524
1020	464	960	274	944	513
1050	464	990	344	974	519
1080	464	1020	352	1004	515
1110	465	1050	312	1026	495
1140	465	1080	355	1146	534
1170	466	1110	358	1266	537
1200	465	1140	358	1386	538
1230	465	1170	359	1506	539
1260	466	1200	360	1626	539
1290	467	1230	360	1746	533
1320	468	1260	362	1866	541
1350	467	1290	362	1986	541
1380	469	1320	362	2106	543
1410	468	1350	363	2226	544
1440	469	1380	364	2346	545
1470	468	1410	364	2466	545
1500	469	1440	364	2586	546
1530	468	1470	364	2706	546
1560	468	1500	364	2826	547
1590	469	1530	365	2946	546
1620	469	1560	365	3066	547
1650	470	1590	366	3186	547
1680	469	1620	366	3306	548
1710	469	1650	366	3426	548
1740	470	1680	367	3546	548
1770	470	1710	366	3666	548
1800	471	1740	368	3786	549
1830	470	1770	366	3906	550
1860	470	1800	366	4026	550
1890	471	1830	367	4146	551
1920	470	1860	367	4266	551
1950	471	1890	369	4386	552
1980	471	1920	368	4506	552
2010	471	1950	368	4626	552
2040	471	1980	369	4746	553
2070	472	2010	369	4866	553
2100	471	2040	369	4986	554
2130	472	2070	370	5106	554
2160	472	2100	369	5226	554
2190	471	2130	369	5346	555
2220	472	2160	368	5466	555
2250	472	2190	369	5586	555
2280	473	2220	370	5706	555
2310	472	2250	370	5826	557
2340	473	2280	370	5946	557
2370	473	2310	370	6066	557
2400	472	2340	370	6186	558
2430	474	2370	372	6306	558
2460	473	2400	370	6426	558
2490	473	2430	371	6546	558
2520	473	2460	372	6666	559
2550	473	2490	372	6786	559
2580	474	2520	372	6906	559
2610	473	2550	371	7026	560
2640	474	2580	372	7146	558
2670	473	2610	372	7266	560
2700	474	2640	372	7386	559
2730	475	2670	372	7506	560
2760	474	2700	372	7626	560
2790	474	2730	373	7746	561
2820	474	2760	374	7866	561
2850	474	2790	372	7986	561
2880	474	2820	373	8106	563
2910	474	2850	374	8226	563
2940	476	2880	373	8346	564
2970	475	2910	373	8466	565
3000	475	2940	374	8586	565
3030	475	2970	374	8706	565
3060	475	3000	373	8826	565
3090	476	3030	373	8946	566
3120	476	3060	373	9066	567
3150	476	3090	373	9186	567
3180	476	3120	375	9306	568
3206	447	3150	374	9426	568
3266	476	3180	374	9546	569
3326	477	3210	375	9666	570
3386	477	3240	374	9786	570
3446	476	3270	374	9906	570
3506	476	3300	375	10026	571
3566	477	3330	374	10146	570
3626	476	3360	375	10266	571
3686	477	3390	375	10386	571
3746	477	3420	375	10506	571
3806	477	3450	375	10626	572
3866	478	3480	375	10746	572
3926	478	3510	375	10866	572
3986	478	3540	376	10986	572
4046	478	3570	376	11106	572
4106	477	3600	377	11226	573
4166	478	3630	375	11346	573
4226	477	3660	376	11466	574
4286	477	3690	376	11586	575
4346	478	3720	376	11706	575
4406	478	3750	376	11826	575
4466	478	3780	376	11946	577
4526	478	3810	376	12066	576
4586	478	3840	375	12186	577
4646	479	3870	376	12306	578
4706	478	3900	375	12426	573
4766	478	3930	376	12546	574
4826	479	3960	376	12666	574
4886	479	3990	376	12786	574
4946	479	4020	375	12906	575
5006	480	4050	375	13026	575
5066	480	4080	375	13146	577
5126	479	4110	375	13266	577
5186	481	4140	375	13386	578
5246	480	4170	374	13506	578
5306	481	4200	376	13626	579
5366	481	4230	374	13746	580
5426	480	4260	375	13866	581
5486	481	4277	328	13986	581
5546	481	4337	332	14106	581
5606	481	4397	372	14226	582
5666	481	4457	376	14346	583
5726	481	4517	378	14466	584
5786	481	4577	378	14586	585
5846	482	4637	380	14706	585
5906	482	4697	380	14826	585
5966	482	4757	381	14946	585
6026	482	4817	380	15066	586
6086	482	4877	381	15186	587
6146	482	4937	381	15306	587
6206	483	4997	382	15426	588
6266	483	5057	383	15546	588
6326	484	5117	383	15666	589
6386	484	5177	382	15786	589
6446	484	5237	383	15906	589
6506	484	5297	384	16026	590
6566	485	5357	383	16146	590
6626	485	5417	384	16266	591
6686	485	5477	384	16386	591
6746	484	5537	383	16506	592
6806	485	5597	385	16626	593
6866	486	5657	384	16746	594
6926	486	5717	385	16866	595
6986	485	5777	385	16986	596
7046	486	5837	385	17106	597
7106	486	5897	385	17226	597
7166	486	5957	386	17346	598
7226	486	6017	386	17466	598
7286	487	6077	386	17586	600
7346	486	6137	386	17706	600
7406	487	6197	386	17826	600
7466	488	6257	388	17946	600
7526	488	6317	387	18066	601
7586	488	6377	387	18186	602
7646	488	6437	388	18306	603
7706	489	6497	387	18426	603
7766	489	6557	387	18546	604
7826	489	6617	387	18666	605
7886	489	6677	387	18786	605
7946	489	6737	388	18906	605
8006	489	6797	388	19026	606
8066	490	6857	389	19146	607
8126	490	6917	390	19266	607
8186	490	6977	389	19386	608
8246	490	7037	389	19506	609
8306	491	7097	389	19626	610
8366	491	7157	389	19746	611
8426	490	7217	390	19866	611
8486	490	7277	390	19986	611
8546	491	7337	390	20106	612
8606	491	7397	390	20226	613
8666	492	7457	390	20346	613
8726	491	7517	391	20466	613
8786	492	7577	392	20586	615
8846	493	7637	392	20706	614
8906	493	7697	392	20826	615
8966	493	7757	392	20946	615
9026	493	7817	392	21066	616
9086	494	7877	392	21186	616
9146	493	7937	392	21306	616
9206	493	7997	393	21426	618
9266	494	8057	394	21546	618
9326	494	8117	393	21666	618
9386	494	8177	393	21786	618
9446	495	8237	394	21906	619
9506	495	8297	393	22026	612
9566	495	8357	393	22146	616
9626	495	8417	394	22266	616
9686	495	8477	394	22386	615
9746	495	8541	394	22506	616
9806	495	8597	395	22626	616
9866	496	8657	394	22746	617
9926	496	8717	395	22866	617
9986	495	8777	395	22986	617
10046	496	8837	395	23106	618
10106	497	8897	395	23226	618
10166	496	8957	396	23346	619
10226	496	9017	397	23466	620
10286	497	9077	396	23586	620
10346	497	9137	397	23706	621
10406	497	9197	396	23826	621
10466	498	9257	397	23946	622
10526	497	9317	396	24066	622
10586	497	9377	396	24186	623
10646	498	9437	396	24306	623
10706	498	9497	396	24426	623
10766	498	9557	396	24546	623
10826	498	9617	395	24666	624
10886	498	9677	396	24786	624
10946	498	9737	395	24906	624
11006	499	9797	395	25026	625
11066	498	9857	396	25146	626
11126	500	9917	395	25266	625
11186	498	9977	395	25386	625
11246	499	10037	395	25506	627
11306	500	10097	396	25626	627
11366	500	10157	395	25746	627
11426	499	10217	395	25866	628
11486	500	10277	395	25986	628
11546	499	10337	394	26106	629
11606	500	10397	394	26226	629
11666	501	10457	395	26346	629
11726	500	10517	395	26466	630
11786	501	10577	394	26586	630
11846	501	10637	394	26706	630
11906	501	10697	395	26826	631
11966	501	10757	395	26946	631
12026	502	10817	395	27066	632
12086	501	10877	395	27186	632
12146	501	10937	394	27306	632
12206	501	10997	394	27426	633
12266	502	11057	394	27546	634
12326	501	11117	394	27666	634
12386	502	11177	395	27786	634
12446	501	11237	393	27906	635
12506	502	11297	394	28026	635
12566	501	11357	394	28146	628
12626	501	11417	393	28266	631
12686	502	11477	393	28386	630
12746	502	11537	394	28506	630
12806	502	11597	393	28626	629
12866	502	11657	394	28746	630
12926	502	11717	393	28866	630
12986	503	11777	393	28986	630
13046	503	11837	393	29106	630
13106	503	11897	392	29226	631
13166	501	11957	391	29346	632
13226	502	12017	393	29466	633
13286	503	12077	393	29586	633
13346	503	12137	393	29706	634
13406	503	12197	392	29826	634
13466	503	12257	393	29946	634
13526	503	12317	393	30066	634
13586	503	12377	392	30186	635
13646	503	12437	392	30306	634
13706	503	12497	392	30426	635
13766	504	12557	392	30546	636
13826	503	12617	392	30666	636
13886	503	12677	391	30786	636
13946	503	12737	393	30906	635
14006	503	12797	392	31026	634
14066	503	12857	392	31146	636
14126	504	12917	392	31266	632
14186	504	12977	392	31386	636
14246	504	13037	391	31506	633
14306	504	13097	391	31626	634
14366	503	13157	393	31746	635
14426	503	13217	392	31866	633
14486	505	13277	391	31986	635
14546	505	13337	392	32106	634
14606	505	13397	392	32226	635
14666	505	13457	392	32346	635
14726	505	13517	391	32466	636
14786	505	13577	391	32586	610
14846	506	13637	390	32706	627
14906	506	13697	390	32826	630
14966	506	13757	391	32946	628
15026	505	13817	391	33066	627
15086	505	13877	390	33186	626
15146	505	13937	391	33306	626
15206	505	13997	391	33426	626
15266	506	14057	391	33546	626
15326	505	14117	391	33666	626
15386	506	14177	391	33786	627
15446	505	14237	389	33906	627
15506	505	14297	391	34026	628
15566	506	14357	390	34146	629
15626	506	14417	390	34266	629
15686	505	14477	391	34386	629
15746	506	14537	391	34506	630
15806	505	14597	391	34626	631
15866	506	14657	390	34746	631
15926	506	14717	391	34866	630
15986	505	14777	390	34986	631
16046	506	14837	389	35106	631
16106	507	14897	390	35226	631
16166	507	14957	391	35346	632
16226	507	15017	390	35466	632
16286	506	15077	390	35586	633
16346	507	15137	390	35706	632
16406	506	15197	390	35826	633
16466	506	15257	390	35946	633
16526	506	15317	390	36066	633
16586	507	15377	390	36186	633
16646	507	15437	389	36306	634
16706	507	15497	389	36426	634
16766	506	15557	389	36546	635
16826	506	15617	389	36666	635
16886	507	15677	388	36786	635
16946	507	15737	388	36906	635
17006	507	15797	388	37026	636
17066	507	15857	388	37146	637
17126	506	15917	389	37266	636
17186	506	15977	389	37386	637
17246	506	16037	388	37506	636
17306	506	16097	388	37626	637
17366	507	16157	389	37746	637
17426	507	16217	388	37866	638
17486	507	16277	388	37986	637
17546	508	16337	388	38106	639
17606	508	16397	388	38226	638
17666	508	16457	387	38346	634
17726	508	16517	387	38466	638
17786	507	16581	387	38586	638
17846	507	16637	388	38706	638
17906	507	16697	388	38826	640
17966	506	16757	387	38946	639
18026	507	16817	387	39066	639
18086	506	16877	386	39186	639
18146	507	16937	387	39306	640
18206	507	16997	387	39426	639
18266	507	17057	387	39546	640
18326	507	17117	387	39666	611
18386	507	17177	386	39786	632
18446	508	17237	386	39906	632
18506	507	17297	386	40026	632
18566	507	17357	387	40146	632
18626	507	17421	386	40266	631
18686	507	17477	386	40386	631
18746	508	17537	386	40506	628
18806	508	17597	387	40626	632
18866	507	17657	387	40746	632
18926	507	17717	386	40866	632
18986	507	17777	387	40986	632
19046	508	17837	386	41106	632
19106	507	17897	386	41226	632
19166	507	17957	386	41346	634
19226	508	18017	386	41466	633
19286	508	18077	387	41586	634
19346	508	18137	386	41706	634
19406	508	18197	386	41826	635
19466	507	18257	385	41946	634
19526	507	18317	386	42066	635
19586	507	18377	385	42186	636
19646	508	18437	386	42306	634
19706	508	18497	385	42426	634
19766	508	18557	384	42546	634
19826	507	18617	385	42666	635
19886	507	18677	386	42786	634
19946	508	18737	384	42906	635
20006	508	18797	385	43026	635
20066	508	18857	384	43146	634
20126	509	18917	384	43266	635
20186	508	18977	384	43386	635
20246	508	19037	384	43506	634
20306	508	19097	384	43626	635
20366	508	19157	384	43746	636
20426	508	19217	385	43866	636
20486	508	19277	384	43986	635
20546	508	19337	384	44106	600
20606	507	19397	384	44226	626
20666	509	19457	384	44346	626
20726	509	19517	383	44466	626
20786	508	19577	384	44586	625
20846	508	19637	384	44706	625
20906	508	19697	384	44826	625
20966	508	19757	384	44946	625
21026	508	19817	384	45066	624
21086	507	19877	384	45186	625
21146	508	19937	383	45306	626
21206	508	19997	383	45426	627
21266	508	20057	383	45546	626
21326	508	20117	385	45666	626
21386	508	20177	382	45786	627
21446	508	20237	383	45906	628
21506	509	20297	383	46026	628
21566	508	20357	383	46146	628
21626	508	20417	382	46266	628
21686	508	20477	383	46386	628
21746	508	20537	382	46506	628
21806	508	20597	382	46626	629
21866	508	20657	383	46746	629
21926	509	20717	382	46866	629
21986	509	20777	383	46986	628
22046	508	20841	382	47106	629
22106	508	20897	382	47226	627
22166	508	20957	382	47346	629
22226	508	21017	382	47466	629
22286	508	21077	381	47586	629
22346	508	21137	381	47706	628
22406	508	21197	381	47826	628
22466	509	21257	382	47946	629
22526	508	21317	381	48066	629
22586	507	21377	382	48186	629
22646	509	21437	381	48306	629
22706	508	21497	381	48426	628
22766	508	21557	381	48546	607
22826	509	21617	382	48666	625
22886	508	21677	382	48786	625
22946	508	21737	382	48906	624
23006	509	21797	382	49026	622
23066	508	21857	381	49146	623
23126	509	21917	381	49266	623
23186	508	21977	381	49386	623
23246	508	22037	381	49506	624
23306	508	22097	382	49626	623
23366	508	22157	382	49746	623
23426	508	22217	382	49866	624
23486	508	22277	382	49986	625
23546	509	22337	382	50106	625
23606	508	22397	382	50226	625
23666	508	22457	381	50346	625
23726	508	22517	381	50466	627
23786	508	22577	381	50586	625
23846	508	22637	381	50706	626
23906	509	22697	381	50826	627
23966	509	22757	381	50946	628
24026	508	22817	381	51066	628
24086	509	22877	381	51186	628
24146	509	22937	381	51306	628
24206	509	22997	381	51426	627
24266	509	23057	381	51546	627
24326	509	23117	381	51666	628
24386	508	23177	381	51786	629
24446	508	23237	382	51906	627
24506	508	23297	381	52026	628
24566	509	23357	381	52146	629
24626	508	23417	380	52266	629
24686	508	23477	381	52386	628
24746	509	23537	380	52506	629
24806	509	23597	381	52626	629
24866	509	23657	382	52746	629
24926	509	23717	383	52866	629
24986	509	23777	384	52986	629
25046	508	23837	384	53106	629
25106	509	23897	383	53226	629
25166	509	23961	383	53346	630
25226	509	24017	382	53466	630
25286	507	24077	382	53586	630
25346	509	24137	382	53706	630
25406	508	24197	383	53826	630
25466	508	24257	382	53946	631
25526	509	24321	382	54066	629
25586	509	24377	384	54186	630
25646	509	24437	382	54306	631
25706	508	24497	382	54426	631
25766	509	24557	383	54546	631
25826	509	24617	383	54666	631
25886	509	24677	382	54786	632
25946	510	24737	382	54906	631
26006	509	24797	383	55026	631
26066	509	24857	382	55146	632
26126	509	24921	383	55266	633
26186	509	24977	383	55386	633
26246	509	25037	384	55506	633
26306	509	25097	383	55626	633
26366	509	25157	382	55746	633
26426	509	25217	383	55866	633
26486	509	25277	383	55986	633
26546	509	25337	383	56106	633
26606	509	25397	382	56226	634
26666	509	25457	383	56346	634
26726	508	25517	383	56466	634
26786	509	25577	382	56586	633
26846	508	25637	382	56706	634
26906	509	25697	382	56826	635
26966	508	25757	383	56946	635
27026	510	25817	382	57066	634
27086	509	25877	383	57186	635
27146	508	25937	383	57306	635
27206	508	25997	382	57426	636
27266	508	26057	382	57546	635
27326	509	26117	382	57666	636
27386	509	26177	382	57786	636
27446	508	26237	382	57906	635
27506	509	26297	382	58026	636
27566	509	26357	383	58146	636
27626	508	26417	383	58266	636
27686	509	26477	383	58386	636
27746	508	26537	382	58506	637
27806	508	26597	382	58626	636
27866	508	26657	382	58746	637
27926	508	26717	382	58866	637
27986	509	26777	382	58986	638
28046	508	26837	382	59106	637
28106	509	26897	383	59226	638
28166	508	26957	382	59346	638
28226	508	27017	383	59466	639
28286	508	27077	381	59586	638
28346	508	27137	382	59706	639
28406	508	27197	382	59826	639
28466	508	27257	382	59946	638
28526	508	27317	383	60066	639
28586	509	27377	383	60186	639
28646	508	27437	382	60306	640
28706	508	27497	382	60426	639
28766	508	27557	382	60546	640
28826	507	27617	382	60666	640
28886	508	27677	382	60786	639
28946	508	27737	382	60906	640
29006	508	27797	381	61026	639
29066	508	27857	382	61146	641
29126	507	27917	382	61266	640
29186	508	27977	383	61386	640
29246	508	28037	381	61506	641
29306	508	28097	382	61626	641
29366	508	28157	382	61746	641
29426	508	28217	382	61866	641
29486	508	28277	382	61986	641
29546	508	28337	381	62106	641
29606	508	28397	381	62226	641
29666	509	28457	381	62346	642
29726	507	28517	381	62466	641
29786	508	28577	381	62586	642
29846	508	28637	383	62706	641
29906	509	28697	382	62826	641
29966	507	28757	383	62946	642
30026	508	28821	382	63066	643
30086	508	28877	383	63186	641
30146	507	28937	382	63306	642
30206	507	28997	382	63426	642
30266	507	29057	382	63546	642
30326	507	29117	382	63666	642
30386	508	29177	381	63786	640
30446	507	29237	382	63906	643
30506	507	29297	381	64026	642
30566	507	29357	381	64146	641
30626	508	29417	381	64266	643
30686	507	29477	381	64386	643
30746	507	29537	381	64506	642
30806	508	29597	381	64626	642
30866	507	29657	381	64746	642
30926	507	29717	381	64866	642
30986	507	29777	381	64986	642
31046	507	29837	381	65106	641
31106	507	29897	381	65226	642
31166	507	29957	382	65346	642
31226	507	30017	382	65466	643
31286	507	30077	381	65586	642
31346	508	30137	382	65706	642
31406	508	30197	381	65826	643
31466	507	30257	382	65946	642
31526	506	30317	381	66066	643
31586	506	30377	382	66186	642
31646	507	30437	381	66306	641
31706	507	30497	343	66426	642
31766	507	30557	377	66546	642
31826	507	30617	384	66666	643
31886	506	30677	386	66786	642
31946	507	30737	386	66906	642
32006	506	30797	386	67026	643
32066	506	30857	386	67146	643
32126	507	30917	387	67266	643
32186	506	30977	388	67386	643
32246	506	31037	387	67506	642
32306	506	31097	387	67626	642
32366	506	31157	389	67746	643
32426	507	31217	388	67866	643
32486	506	31277	388	67986	643
32546	506	31337	388	68106	643
32606	506	31397	389	68226	642
32666	506	31457	389	68346	642
32726	507	31517	389	68466	642
32786	506	31577	389	68586	643
32846	505	31637	388	68706	643
32906	506	31697	388	68826	640
32966	506	31757	389	68946	642
33026	506	31817	388	69066	642
33086	506	31877	388	69186	641
33146	506	31937	389	69306	640
33206	506	31997	389	69426	643
33266	506	32057	390	69546	643
33326	506	32117	389	69666	637
33386	505	32177	390	69786	642
33446	506	32237	389	69906	642
33506	505	32297	389	70026	641
33566	505	32357	389	70146	642
33626	506	32417	389	70266	642
33686	506	32477	391	70386	643
33746	505	32537	390	70506	643
33806	505	32597	390	70626	643
33866	506	32657	390	70746	644
33926	505	32717	389	70866	642
33986	505	32777	390	70986	643
34046	506	32837	389	71106	643
34106	505	32897	388	71226	643
34166	506	32957	390	71346	643
34226	504	33017	390	71466	643
34286	505	33077	390	71586	643
34346	504	33137	390	71706	643
34406	505	33197	389	71826	642
34466	505	33257	390	71946	642
34526	504	33317	389	72066	642
34586	505	33377	390	72186	642
34646	505	33437	389	72306	642
34706	504	33497	390	72426	643
34766	505	33557	389	72546	643
34826	505	33617	390	72666	643
34886	504	33677	389	72786	643
34946	504	33737	389	72906	643
35006	504	33797	389	73026	642
35066	505	33857	388	73146	642
35126	505	33917	388	73266	643
35186	504	33977	388	73386	642
35246	505	34037	390	73506	643
35306	505	34097	391	73626	642
35366	504	34157	389	73746	642
35426	504	34217	388	73866	642
35486	504	34277	389	73986	642
35546	505	34337	389	74106	642
35606	503	34397	389	74226	642
35666	504	34457	390	74346	643
35726	504	34517	389	74466	642
35786	504	34581	390	74586	642
35846	504	34637	390	74706	642
35906	504	34697	390	74826	642
35966	503	34757	389	74946	642
36026	504	34817	389	75066	641
36086	503	34877	389	75186	642
36146	504	34937	389	75306	641
36206	503	34997	389	75426	642
36266	504	35057	389	75546	641
36326	503	35117	388	75666	642
36386	502	35181	388	75786	642
36446	503	35237	388	75906	642
36506	503	35297	388	76026	642
36566	503	35357	388	76146	642
36626	503	35417	388	76266	642
36686	503	35477	388	76386	642
36746	502	35537	388	76506	642
36806	503	35597	388	76626	642
36866	503	35657	388	76746	642
36926	503	35717	388	76866	641
36986	502	35777	388	76986	642
37046	502	35837	388	77106	642
37106	503	35897	388	77226	641
37166	503	35957	387	77346	641
37226	503	36017	387	77466	642
37286	505	36077	387	77586	642
37346	471	36137	387	77706	642
37406	497	36197	388	77826	641
37466	507	36257	387	77946	642
37526	509	36317	387	78066	641
37586	510	36377	387	78186	642
37646	511	36437	387	78306	639
37706	510	36497	387	78426	641
37766	511	36557	387	78546	640
37826	512	36617	387	78666	641
37886	511	36677	387	78786	642
37946	512	36737	386	78906	642
38006	511	36797	386	79026	639
38066	512	36857	387	79146	640
38126	513	36917	386	79266	639
38186	512	36977	386	79386	641
38246	513	37037	386	79506	641
38306	513	37097	386	79626	641
38366	512	37157	386	79746	641
38426	513	37217	386	79866	641
38486	513	37277	386	79986	641
38546	514	37337	385	80106	640
38606	513	37397	386	80226	641
38666	514	37457	385	80346	641
38726	515	37517	386	80466	641
38786	513	37577	385	80586	639
38846	514	37637	386	80706	640
38906	514	37697	385	80826	640
38966	514	37757	385	80946	641
39026	514	37817	386	81066	639
39086	515	37881	386	81186	640
39146	515	37937	384	81306	640
39206	515	37997	385	81426	640
39266	515	38057	385	81546	640
39326	515	38117	385	81666	640
39386	515	38186	385	81786	640
39446	515	38237	385	81906	640
39506	516	38297	385	82026	640
39566	516	38357	386	82146	640
39626	516	38417	385	82266	640
39686	516	38477	384	82386	640
39746	516	38537	324	82506	640
39806	516	38597	383	82626	639
39866	516	38657	389	82746	639
39926	516	38717	389	82866	639
39986	516	38777	390	82986	640
40046	516	38837	391	83106	640
40106	515	38897	392	83226	638
40166	516	38957	391	83346	635
40226	516	39017	391	83466	633
40286	516	39077	392	83586	634
40346	517	39137	393	83706	633
40406	517	39197	392	83826	633
40466	517	39257	392	83946	633
40526	517	39317	393	84066	633
40586	517	39377	393	84186	633
40646	517	39441	393	84306	633
40706	517	39497	393	84426	633
40766	517	39557	392	84546	633
40826	517	39617	393	84666	633
40886	518	39677	393	84786	634
40946	517	39737	393	84906	633
41006	518	39801	393	85026	633
41066	517	39857	394	85146	632
41126	518	39921	394	85266	634
41186	516	39977	394	85386	634
41246	517	40037	394	85506	634
41306	518	40101	394	85626	634
41366	518	40157	393	85746	634
41426	518	40217	394	85866	635
41486	518	40277	394	85986	634
41546	518	40337	394	86106	634
41606	517	40397	394	86226	634
41666	518	40457	394	86346	633
41726	518	40517	393	86466	633
41786	517	40577	393	86586	635
41846	517	40637	393	86706	634
41906	517	40697	393	86826	635
41966	518	40757	394	86946	634
42026	517	40817	394	87066	634
42086	518	40877	394	87186	634
42146	518	40937	394	87306	634
42206	518	40997	394	87426	633
42266	517	41057	394	87546	635
42326	518	41117	393	87666	634
42386	517	41177	393	87786	634
42446	517	41237	394	87906	635
42506	518	41297	394	88026	634
42566	518	41357	394	88146	634
42626	518	41417	394	88266	618
42686	517	41477	393	88386	629
42746	518	41537	394	88506	628
42806	518	41597	393	88626	628
42866	518	41657	394	88746	627
42926	518	41717	393	88866	627
42986	518	41777	393	88986	628
43046	517	41837	394	89106	626
43106	518	41897	393	89226	627
43166	517	41957	394	89346	627
43226	517	42017	393	89466	627
43286	492	42077	393	89586	628
43346	488	42137	394	89706	628
43406	515	42197	393	89826	628
43466	520	42257	394	89946	628
43526	521	42317	393	90066	627
43586	522	42377	393	90186	629
43646	522	42437	393	90306	629
43706	523	42497	392	90426	629
43766	524	42557	393	90546	629
43826	524	42617	393	90666	629
43886	525	42677	393	90786	628
43946	524	42737	393	90906	630
44006	524	42797	393	91026	630
44066	525	42857	392	91146	628
44126	524	42917	392	91266	629
44186	525	42977	393	91386	629
44246	525	43037	392	91506	630
44306	526	43097	391	91626	630
44366	525	43157	392	91746	630
44426	526	43217	392	91866	630
44486	526	43281	392	91986	610
44546	526	43337	392	92106	623
44606	526	43397	392	92226	623
44666	527	43457	392	92346	621
44726	527	43517	391	92466	623
44786	527	43577	391	92586	622
44846	527	43637	392	92706	622
44906	527	43697	392	92826	622
44966	528	43757	391	92946	622
45026	528	43817	392	93066	622
45086	527	43877	391	93186	623
45146	528	43937	391	93306	622
45206	527	43997	391	93426	622
45266	527	44057	392	93546	622
45326	528	44117	390	93666	623
45386	528	44177	390	93786	622
45446	528	44237	390	93906	621
45506	528	44297	391	94026	621
45566	528	44357	391	94146	622
45626	529	44417	391	94266	622
45686	528	44477	390	94386	621
45746	528	44537	390	94506	621
45806	529	44597	390	94626	624
45866	529	44657	390	94746	622
45926	529	44717	389	94866	624
45986	528	44777	390	94986	624
46046	528	44837	390	95106	624
46106	529	44897	390	95226	625
46166	529	44957	389	95346	625
46226	529	45017	390	95466	623
46286	528	45077	389	95586	622
46346	529	45137	390	95706	625
46406	529	45197	389	95826	625
46466	529	45257	390	95946	626
46526	529	45317	389	96066	626
46586	529	45377	389	96186	626
46646	529	45437	390	96306	626
46706	530	45497	389	96426	627
46766	530	45557	388	96546	627
46826	529	45617	389	96666	627
46886	530	45677	389	96786	596
46946	529	45737	389	96906	621
47006	529	45797	388	97026	619
47066	530	45857	388	97146	621
47126	530	45917	388	97266	622
47186	530	45977	388	97386	619
47246	530	46037	389	97506	619
47306	531	46097	389	97626	621
47366	530	46157	387	97746	621
47426	530	46217	389	97866	621
47486	530	46277	389	97986	621
47546	530	46337	389	98106	623
47606	530	46397	387	98226	622
47666	530	46457	389	98346	623
47726	530	46517	389	98466	623
47786	530	46577	388	98586	623
47846	529	46646	387	98706	623
47906	529	46697	387	98826	624
47966	530	46757	388	98946	624
48026	530	46817	387	99066	625
48086	530	46877	387	99186	625
48146	530	46937	387	99306	625
48206	530	46997	387	99426	625
48266	530	47057	387	99546	626
48326	530	47117	387	99666	626
48386	530	47177	387	99786	627
48446	530	47237	387	99906	626
48506	529	47297	387	100026	627
48566	530	47357	387	100146	626
48626	530	47417	386	100266	626
48686	530	47477	386	100386	627
48746	530	47537	386	100506	628
48806	530	47601	386	100626	628
48866	530	47657	385	100746	628
48926	529	47717	385	100866	629
48986	530	47777	386	100986	628
49046	529	47837	385	101106	628
49106	530	47897	386	101226	630
49166	530	47957	386	101346	629
49226	530	48017	385	101466	629
49286	529	48077	385	101586	630
49346	529	48137	385	101706	629
49406	529	48197	386	101826	629
49466	530	48257	385	101946	631
49526	529	48317	385	102066	630
49586	529	48377	384	102186	630
49646	530	48437	386	102306	630
49706	529	48497	385	102426	631
49766	530	48557	386	102546	630
49826	529	48617	385	102666	631
49886	528	48681	384	102786	631
49946	529	48737	385	102906	632
50006	529	48797	384	103026	632
50066	529	48857	384	103146	631
50126	529	48917	384	103266	632
50186	529	48977	384	103386	632
50246	529	49037	344	103506	633
50306	529	49097	382	103626	632
50366	528	49157	387	103746	634
50426	529	49217	388	103866	633
50486	528	49248	323	103986	633
50546	528	49368	388	104106	633
50606	529	49488	390	104226	634
50666	529	49608	391	104346	634
50726	528	49728	390	104466	634
50786	528	49848	391	104586	634
50846	528	49968	392	104706	635
50906	529	50088	392	104826	634
50966	529	50208	392	104946	635
51026	529	50328	392	105066	635
51086	528	50448	393	105186	635
51146	529	50568	393	105306	635
51206	528	50688	392	105426	635
51266	529	50808	393	105546	635
51326	528	50928	393	105666	636
51386	529	51048	393	105786	636
51446	529	51168	394	105906	636
51506	529	51288	393	106026	636
51566	529	51408	394	106146	636
51626	529	51528	394	106266	636
51686	528	51648	393	106386	636
51746	528	51768	394	106506	636
51806	528	51888	394	106626	637
51866	528	52008	394	106746	637
51926	495	52128	393	106866	637
51986	525	52248	393	106986	637
52046	527	52368	394	107106	637
52106	530	52488	394	107226	637
52166	529	52608	394	107346	638
52226	530	52728	394	107466	638
52286	531	52848	394	107586	638
52346	531	52968	394	107706	638
52406	531	53088	392	107826	639
52466	531	53208	394	107946	639
52526	531	53328	393	108066	619
52586	532	53448	394	108186	633
52646	531	53568	393	108306	634
52706	532	53688	394	108426	633
52766	533	53808	393	108546	633
52826	532	53928	393	108666	633
52886	531	54048	392	108786	633
52946	532	54168	393	108906	633
53006	532	54288	392	109026	633
53066	532	54408	392	109146	633
53126	532	54528	392	109266	633
53186	532	54648	391	109386	634
53246	533	54768	392	109506	634
53306	532	54888	392	109626	634
53366	532	55008	392	109746	633
53426	532	55128	391	109866	634
53486	532	55248	392	109986	635
53546	532	55368	391	110106	634
53606	533	55488	390	110226	635
53666	531	55608	390	110346	635
53726	532	55728	390	110466	635
53786	532	55848	390	110586	636
53846	532	55968	389	110706	636
53906	533	56088	390	110826	636
53966	532	56208	390	110946	637
54026	532	56328	390	111066	636
54086	533	56448	389	111186	636
54146	532	56568	388	111306	637
54206	534	56688	389	111426	637
54266	532	56808	389	111546	638
54326	532	56928	388	111666	638
54386	533	57048	389	111786	638
54446	533	57168	387	111906	638
54506	534	57288	388	112026	637
54566	532	57408	387	112146	639
54626	533	57528	388	112266	639
54686	533	57648	388	112386	639
54746	534	57768	388	112506	639
54806	533	57888	388	112626	639
54866	533	58008	387	112746	640
54926	533	58128	387	112866	639
54986	533	58248	387	112986	639
55046	534	58368	386	113106	640
55106	533	58488	386	113226	640
55166	533	58608	386	113346	641
55226	534	58728	386	113466	641
55286	535	58848	387	113586	641
55346	533	58968	386	113706	641
55406	533	59088	385	113826	641
55466	534	59208	385	113946	642
55526	534	59328	386	114066	642
55586	534	59448	385	114186	642
55646	533	59568	385	114306	642
55706	534	59688	385	114426	642
55766	534	59808	385	114546	642
55826	533	59928	384	114666	632
55886	534	60048	384	114786	638
55946	534	60168	385	114906	637
56006	534	60288	385	115026	637
56066	534	60408	384	115146	637
56126	534	60528	386	115266	637
56186	533	60648	385	115386	637
56246	534	60768	385	115506	637
56306	534	60888	383	115626	638
56366	533	61008	384	115746	637
56426	534	61128	383	115866	637
56486	533	61248	383	115986	637
56546	533	61368	382	116106	637
56606	534	61488	383	116226	638
56666	533	61608	384	116346	638
56726	533	61728	384	116466	638
56786	534	61848	384	116586	638
56846	533	61968	383	116706	638
56906	534	62088	383	116826	638
56966	534	62208	383	116946	638
57026	533	62328	382	117066	638
57086	534	62448	382	117186	638
57146	534	62568	382	117306	639
57206	534	62688	383	117426	638
57266	533	62808	382	117546	638
57326	533	62928	382	117666	639
57386	533	63048	382	117786	639
57446	533	63168	382	117906	638
57506	533	63288	380	118026	639
57566	533	63408	382	118146	638
57626	533	63528	383	118266	638
57686	533	63648	383	118386	638
57746	533	63768	383	118506	639
57806	533	63888	382	118626	639
57866	533	64008	382	118746	639
57926	533	64128	382	118866	639
57986	533	64248	380	118986	639
58046	533	64368	381	119106	639
58106	533	64488	382	119226	639
58166	533	64608	382	119346	640
58226	533	64728	382	119466	639
58286	533	64848	383	119586	639
58346	532	64968	382	119706	641
58406	533	65088	382	119826	641
58466	533	65208	382	119946	640
58526	533	65328	381	120066	639
58586	531	65448	381	120186	640
58646	532	65568	382	120306	640
58706	532	65688	381	120426	640
58766	532	65808	381	120546	640
58826	532	65928	381	120666	641
58886	532	66048	382	120786	640
58946	531	66168	381	120906	641
59006	532	66288	382	121026	641
59066	532	66408	382	121146	641
59126	532	66528	381	121266	641
59186	532	66648	381	121386	640
59246	532	66768	381	121506	641
59306	532	66888	382	121626	641
59366	532	67008	381	121746	641
59426	532	67128	382	121866	641
59486	532	67248	381	121986	641
59546	532	67368	381	122106	641
59606	532	67488	380	122226	642
59666	532	67608	380	122346	641
59726	531	67728	382	122466	641
59786	532	67848	381	122586	642
59846	532	67968	381	122706	641
59906	531	68088	382	122826	642
59966	531	68208	381	122946	641
60026	532	68328	381	123066	641
60086	531	68448	380	123186	642
60146	531	68568	381	123306	610
60206	531	68688	381	123426	634
60266	531	68808	381	123546	635
60326	531	68928	380	123666	634
60386	531	69048	381	123786	633
60446	531	69168	382	123906	633
60506	531	69288	382	124026	632
60566	531	69408	381	124146	633
60626	531	69528	381	124266	632
60686	531	69648	380	124386	631
60746	531	69768	381	124506	632
60806	530	69888	379	124626	632
60866	531	70008	380	124746	633
60926	531	70128	380	124866	633
60986	531	70248	381	124986	633
61046	530	70368	380	125106	630
61106	530	70488	381	125226	633
61166	531	70608	381	125346	634
61226	531	70728	381	125466	634
61286	531	70848	381	125586	634
61346	530	70968	381	125706	634
61406	531	71088	380	125826	634
61466	530	71208	381	125946	634
61526	531	71328	381	126066	634
61586	530	71448	380	126186	635
61646	531	71568	380	126306	634
61706	531	71688	380	126426	635
61766	530	71808	380	126546	635
61826	531	71928	381	126666	635
61886	529	72048	381	126786	634
61946	529	72168	381	126906	635
62006	530	72288	380	127026	634
62066	531	72408	380	127146	635
62126	530	72528	380	127266	632
62186	530	72648	380	127386	635
62246	530	72768	380	127506	635
62306	530	72888	380	127626	634
62366	529	73008	380	127746	635
62426	529	73128	380	127866	635
62486	530	73248	380	127986	634
62546	530	73368	380	128106	634
62606	530	73488	380	128226	634
62666	528	73612	380	128346	634
62726	530	73728	380	128466	597
62786	529	73848	380	128586	627
62846	528	73968	381	128706	628
62906	529	74088	380	128826	627
62966	529	74208	380	128946	628
63026	529	74328	380	129066	627
63086	529	74448	380	129186	626
63146	529	74568	379	129306	625
63206	529	74688	379	129426	625
63266	529	74808	380	129546	626
63326	528	74928	379	129666	625
63386	529	75048	380	129786	626
63446	528	75168	380	129906	626
63506	528	75288	380	130026	626
63566	528	75408	379	130146	626
63626	529	75528	380	130266	627
63686	528	75648	379	130386	627
63746	528	75768	379	130506	627
63806	528	75888	381	130626	627
63866	527	76008	380	130746	628
63926	528	76128	379	130866	628
63986	527	76248	380	130986	628
64046	527	76368	379	131106	628
64106	527	76488	379	131226	628
64166	527	76608	379	131346	629
64226	527	76728	379	131466	629
64286	527	76848	379	131586	629
64346	528	76968	379	131706	630
64406	527	77088	379	131826	629
64466	526	77208	378	131946	629
64526	527	77328	379	132066	629
64586	527	77448	379	132186	629
64646	493	77568	380	132306	630
64706	496	77688	379	132426	630
64766	528	77808	380	132546	630
64826	530	77928	379	132666	629
64886	531	78048	378	132786	630
64946	532	78168	379	132906	630
65006	533	78288	379	133026	631
65066	534	78408	379	133146	630
65126	535	78528	380	133266	631
65186	534	78648	379	133386	631
65246	534	78768	379	133506	631
65306	535	78892	378	133626	632
65366	535	79008	379	133746	631
65426	535	79128	378	133866	632
65486	535	79248	378	133986	632
65546	536	79368	379	134106	632
65606	535	79488	378	134226	632
65666	536	79608	379	134346	632
65726	536	79728	379	134466	632
65786	536	79848	380	134586	632
65846	536	79968	379	134706	612
65906	536	80088	379	134826	627
65966	537	80208	379	134946	626
66026	536	80328	378	135066	626
66086	537	80448	379	135186	626
66146	537	80568	380	135306	626
66206	536	80688	378	135426	625
66266	538	80808	378	135546	625
66326	537	80928	378	135666	625
66386	538	81048	379	135786	625
66446	537	81168	379	135906	624
66506	537	81288	379	136026	626
66566	539	81408	380	136146	626
66626	537	81528	379	136266	626
66686	537	81648	379	136386	627
66746	537	81768	379	136506	627
66806	538	81888	379	136626	626
66866	538	82008	379	136746	627
66926	538	82128	378	136866	629
66986	538	82248	379	136986	628
67046	538	82368	378	137106	628
67106	539	82488	378	137226	629
67166	538	82608	379	137346	628
67226	539	82728	378	137466	630
67286	538	82848	378	137586	629
67346	538	82968	378	137706	629
67406	538	83088	378	137826	630
67466	539	83208	379	137946	630
67526	539	83328	378	138066	630
67586	539	83448	378	138186	630
67646	539	83568	378	138306	631
67706	539	83688	378	138426	630
67766	539	83808	378	138546	630
67826	540	83928	379	138666	631
67886	538	84048	379	138786	631
67946	538	84168	378	138906	631
68006	539	84288	379	139026	631
68066	538	84408	379	139146	630
68126	538	84528	379	139266	632
68186	539	84648	379	139386	632
68246	539	84768	378	139506	632
68306	539	84888	379	139626	632
68366	539	85008	379	139746	632
68426	539	85128	378	139866	632
68486	540	85248	379	139986	632
68546	539	85368	349	140106	633
68606	539	85488	381	140226	633
68666	538	85608	383	140346	633
68726	539	85728	383	140466	633
68786	539	85848	384	140586	633
68846	539	85968	382	140706	634
68906	539	86088	384	140826	634
68966	539	86208	383	140946	632
69026	539	86328	383	141066	633
69086	539	86448	384	141186	634
69146	538	86568	383	141306	634
69206	539	86688	383	141426	634
69266	539	86808	383	141546	632
69326	539	86928	384	141666	635
69386	539	87048	383	141786	635
69446	539	87168	383	141906	635
69506	539	87288	382	142026	635
69566	539	87408	383	142146	634
69626	539	87528	383	142266	633
69686	539	87648	381	142386	635
69746	539	87768	382	142506	635
69806	538	87888	383	142626	635
69866	538	88008	383	142746	636
69926	538	88128	382	142866	635
69986	538	88248	382	142986	636
70046	539	88368	383	143106	635
70106	537	88488	382	143226	637
70166	538	88608	383	143346	635
70226	538	88728	382	143466	637
70286	537	88848	382	143586	637
70346	538	88968	381	143706	635
70406	538	89088	380	143826	636
70466	538	89208	381	143946	637
70526	539	89328	381	144066	636
70586	538	89448	381	144186	637
70646	537	89568	382	144306	635
70706	537	89688	381	144426	638
70766	537	89808	381	144546	638
70826	537	89928	381	144666	637
70886	538	90048	381	144786	637
70946	538	90168	381	144906	638
71006	538	90288	380	145026	639
71066	538	90408	380	145146	639
71126	537	90528	381	145266	639
71186	537	90648	380	145386	639
71246	537	90768	381	145506	639
71306	537	90888	381	145626	639
71366	537	91008	381	145746	640
71426	537	91128	381	145866	640
71486	537	91248	381	145986	639
71546	538	91368	382	146106	640
71606	537	91488	381	146226	640
71666	537	91608	381	146346	640
71726	537	91728	381	146466	640
71786	537	91848	381	146586	640
71846	537	91968	380	146706	640
71906	537	92088	381	146826	640
71966	537	92208	380	146946	641
72026	537	92328	380	147066	640
72086	537	92448	381	147186	640
72146	537	92568	380	147306	641
72206	536	92688	381	147426	641
72266	536	92808	381	147546	641
72326	538	92928	381	147666	642
72386	537	93048	380	147786	642
72446	536	93168	381	147906	642
72506	536	93288	380	148026	642
72566	536	93408	379	148146	642
72626	536	93528	380	148266	641
72686	536	93648	379	148386	642
72746	536	93768	380	148506	641
72806	536	93888	380	148626	642
72866	536	94008	380	148746	643
72926	537	94128	380	148866	643
72986	536	94248	380	148986	642
73046	535	94368	380	149106	642
73106	536	94488	379	149226	642
73166	535	94608	379	149346	642
73226	536	94728	380	149466	640
73286	536	94848	380	149586	640
73346	535	94968	380	149706	643
73406	536	95088	380	149826	643
73466	536	95208	380	149946	642
73526	497	95328	380	150066	643
73586	533	95448	380	150186	643
73646	537	95568	380	150306	643
73706	538	95688	380	150426	642
73766	538	95808	380	150546	642
73826	539	95928	380	150666	642
73886	538	96048	380	150786	642
73946	538	96168	380	150906	643
74006	538	96288	380	151026	643
74066	538	96408	379	151146	640
74126	538	96528	380	151266	643
74186	539	96648	329	151386	642
74246	538	96768	383	151506	643
74306	538	96888	389	151626	643
74366	538	97008	390	151746	643
74426	539	97128	392	151866	642
74486	538	97248	392	151986	642
74546	537	97368	392	152106	643
74606	538	97488	394	152226	643
74666	538	97608	393	152346	643
74726	539	97728	394	152466	644
74786	538	97848	395	152586	643
74846	538	97968	396	152706	643
74906	538	98088	396	152826	643
74966	538	98212	395	152946	643
75026	537	98328	397	153066	644
75086	539	98448	396	153186	644
75146	538	98568	397	153306	644
75206	538	98688	397	153426	644
75266	537	98808	398	153546	644
75326	538	98928	398	153666	643
75386	538	99048	397	153786	644
75446	539	99168	397	153906	644
75506	538	99288	397	154026	643
75566	538	99408	399	154146	644
75626	538	99528	398	154266	643
75686	537	99648	399	154386	644
75746	538	99768	399	154506	644
75806	538	99888	399	154626	642
75866	538	100008	399	154746	644
75926	537	100128	400	154866	642
75986	537	100248	398	154986	643
76046	538	100368	399	155106	644
76106	537	100488	399	155226	644
76166	538	100608	399	155346	644
76226	537	100728	399	155466	644
76286	537	100848	399	155586	644
76346	537	100968	399	155706	643
76406	536	101088	398	155826	644
76466	538	101208	399	155946	642
76526	537	101328	399	156066	642
76586	537	101448	398	156186	643
76646	537	101572	399	156306	646
76706	537	101688	399	156426	643
76766	537	101808	398	156546	645
76826	537	101928	398	156666	644
76886	537	102048	398	156786	645
76946	537	102168	397	156906	643
77006	537	102288	398	157026	645
77066	537	102408	397	157146	645
77126	537	102528	397	157266	646
77186	536	102652	397	157386	646
77246	537	102768	397	157506	643
77306	536	102888	397	157626	645
77366	536	103008	397	157746	645
77426	536	103128	397	157866	645
77486	536	103248	396	157986	644
77546	536	103368	397	158106	645
77606	536	103488	397	158226	644
77666	536	103608	396	158346	642
77726	536	103728	395	158466	645
77786	536	103848	395	158586	645
77846	535	103968	396	158706	645
77906	536	104088	395	158826	645
77966	537	104208	395	158946	644
78026	536	104328	395	159066	645
78086	536	104448	394	159186	644
78146	536	104568	394	159306	644
78206	535	104688	394	159426	644
78266	534	104808	394	159546	643
78326	536	104928	394	159666	645
78386	535	105048	393	159786	644
78446	536	105168	394	159906	646
78506	535	105288	394	160026	642
78566	535	105412	393	160146	644
78626	535	105528	393	160266	645
78686	535	105648	392	160386	645
78746	534	105768	392	160506	646
78806	534	105888	392	160626	644
78866	534	106008	391	160746	645
78926	534	106128	391	160866	645
78986	534	106248	391	160986	645
79046	535	106368	390	161106	645
79106	534	106488	391	161226	645
79166	533	106608	390	161346	645
79226	534	106728	390	161466	645
79286	534	106848	391	161586	642
79346	534	106968	390	161706	645
79406	534	107088	389	161826	644
79466	533	107208	390	161946	645
79526	534	107328	390	162066	645
79586	535	107448	390	162186	645
79646	533	107568	390	162306	645
79706	533	107688	389	162426	644
79766	533	107808	389	162546	645
79826	533	107928	388	162666	644
79886	533	108048	389	162786	645
79946	533	108168	388	162906	645
80006	532	108288	388	163026	645
80066	531	108408	388	163146	644
80126	532	108528	388	163266	644
80186	532	108648	386	163386	645
80246	531	108768	386	163506	645
80306	531	108888	386	163626	641
80366	531	109008	386	163746	644
80426	532	109128	385	163866	645
80486	530	109248	386	163986	644
80546	531	109368	356	164106	645
80606	531	109488	387	164226	645
80666	532	109608	389	164346	645
80726	531	109728	390	164466	644
80786	487	109848	389	164586	644
80846	525	109968	389	164706	644
80906	532	110088	389	164826	643
80966	534	110208	390	164946	644
81026	535	110328	390	165066	643
81086	536	110448	390	165186	641
81146	536	110568	389	165306	639
81206	537	110688	389	165426	645
81266	537	110808	389	165546	643
81326	537	110928	389	165666	644
81386	537	111048	389	165786	644
81446	536	111168	389	165906	642
81506	538	111288	389	166026	642
81566	537	111408	389	166146	644
81626	537	111528	389	166266	643
81686	538	111648	389	166386	638
81746	538	111768	388	166506	643
81806	539	111888	389	166626	645
81866	537	112008	389	166746	643
81926	538	112128	388	166866	644
81986	538	112248	389	166986	644
82046	539	112368	388	167106	644
82106	539	112488	388	167226	643
82166	539	112608	388	167346	643
82226	538	112728	388	167466	643
82286	540	112848	387	167586	644
82346	538	112968	387	167706	644
82406	539	113088	387	167826	643
82466	539	113208	387	167946	643
82526	539	113328	386	168066	644
82586	539	113448	388	168186	642
82646	539	113568	387	168306	643
82706	539	113688	386	168426	644
82766	538	113808	386	168546	641
82826	539	113928	386	168666	643
82886	538	114048	386	168786	642
82946	539	114168	387	168906	640
83006	539	114288	386	169026	641
83066	539	114408	386	169146	643
83126	540	114528	386	169266	640
83186	539	114648	386	169386	643
83246	539	114768	385	169506	642
83306	539	114888	385	169626	641
83366	539	115008	384	169746	643
83426	539	115128	384	169866	640
83486	540	115248	384	169986	643
83546	540	115368	384	170106	640
83606	540	115488	384	170226	643
83666	539	115608	383	170346	644
83726	539	115728	384	170466	639
83786	539	115848	384	170586	639
83846	539	115968	384	170706	639
83906	538	116088	384	170826	639
83966	539	116208	383	170946	639
84026	539	116328	384	171066	638
84086	539	116448	383	171186	638
84146	539	116568	383	171306	638
84206	539	116688	383	171426	615
84266	539	116808	382	171546	634
84326	539	116928	382	171666	633
84386	539	117048	382	171786	637
84446	538	117168	382	171906	634
84506	539	117288	382	172026	631
84566	539	117408	382	172146	631
84626	539	117528	382	172266	635
84686	538	117648	382	172386	636
84746	539	117768	380	172506	634
84806	539	117888	381	172626	632
84866	539	118008	382	172746	632
84926	539	118128	380	172866	631
84986	538	118248	382	172986	632
85046	538	118368	381	173106	631
85106	537	118488	380	173226	631
85166	537	118608	381	173346	635
85226	537	118728	380	173466	635
85286	538	118848	381	173586	631
85346	537	118968	381	173706	635
85406	538	119088	380	173826	636
85466	537	119208	380	173946	635
85526	538	119328	381	174066	636
85586	537	119448	380	174186	632
85646	537	119568	380	174306	632
85706	536	119688	382	174426	631
85766	537	119808	383	174546	633
85826	537	119928	384	174666	636
85886	537	120048	383	174786	633
85946	537	120172	382	174906	634
86006	537	120288	383	175026	634
86066	537	120408	383	175146	632
86126	536	120528	383	175266	635
86186	537	120648	384	175386	636
86246	537	120768	384	175506	636
86306	536	120888	384	175626	635
86366	536	121008	384	175746	613
86426	535	121128	384	175866	630
86486	536	121248	384	175986	629
86546	536	121368	384	176106	629
86606	537	121488	384	176226	626
86666	536	121608	384	176346	624
86726	536	121728	384	176466	628
86786	536	121848	385	176586	624
86846	535	121968	385	176706	625
86906	535	122088	384	176826	625
86966	536	122208	384	176946	624
87026	536	122328	384	177066	626
87086	535	122448	384	177186	627
87146	535	122568	384	177306	624
87206	534	122688	384	177426	625
87266	534	122808	384	177546	625
87326	534	122928	384	177666	624
87386	534	123048	384	177786	627
87446	535	123168	384	177906	628
87506	534	123288	383	178026	628
87566	534	123408	384	178146	625
87626	534	123528	384	178266	624
87686	534	123648	383	178386	627
87746	534	123768	384	178506	625
87806	533	123888	383	178626	625
87866	534	124008	384	178746	625
87926	533	124128	384	178866	625
87986	533	124248	384	178986	629
88046	533	124368	384	179106	629
88106	533	124488	383	179226	628
88166	533	124608	383	179346	629
88226	532	124728	383	179466	626
88286	532	124848	383	179586	628
88346	532	124968	383	179706	625
88406	532	125088	383	179826	624
88466	531	125208	383	179946	625
88526	532	125328	384	180066	605
88586	532	125448	383	180186	624
88646	532	125568	383	180306	621
88706	482	125688	383	180426	623
88766	529	125808	383	180546	624
88826	534	125928	383	180666	624
88886	534	126048	383	180786	623
88946	536	126168	383	180906	623
89006	536	126288	383	181026	623
89066	537	126408	383	181146	624
89126	537	126528	383	181266	624
89186	537	126648	382	181386	624
89246	536	126768	383	181506	622
89306	538	126888	383	181626	624
89366	537	127008	383	181746	620
89426	538	127128	382	181866	624
89486	537	127248	382	181986	620
89546	538	127368	383	182106	624
89606	537	127488	382	182226	625
89666	537	127608	332	182346	624
89726	538	127732	383	182466	624
89786	538	127848	390	182586	622
89846	537	127968	392	182706	625
89906	538	128088	392	182826	624
89966	537	128208	394	182946	626
90026	538	128328	393	183066	603
90086	537	128448	393	183186	623
90146	537	128568	395	183306	622
90206	537	128688	394	183426	619
90266	537	128808	396	183546	622
90326	537	128928	396	183666	620
90386	538	129048	396	183786	621
90446	538	129168	397	183906	622
90506	538	129288	397	184026	620
90566	537	129408	398	184146	622
90626	537	129532	398	184266	618
90686	537	129648	398	184386	619
90746	538	129768	397	184506	623
90806	537	129888	398	184626	619
90866	537	130008	399	184746	622
90926	537	130128	398	184866	619
90986	537	130248	398	184986	621
91046	538	130368	398	185106	619
91106	538	130488	398	185226	623
91166	538	130608	399	185346	624
91226	538	130728	399	185466	625
91286	537	130848	398	185586	622
91346	538	130968	398	185706	625
91406	538	131088	398	185826	624
91466	537	131208	399	185946	626
91526	538	131328	399	186066	623
91586	537	131448	399	186186	623
91646	537	131568	398	186306	623
91706	537	131688	398	186426	623
91766	538	131808	398	186546	626
91826	537	131928	398	186666	627
91886	538	132048	398	186786	625
91946	537	132168	398	186906	628
92006	537	132288	398	187026	624
92066	537	132408	398	187146	624
92126	536	132528	398	187266	625
92186	537	132648	398	187386	627
92246	537	132768	398	187506	627
92306	537	132888	397	187626	628
92366	537	133008	397	187746	627
92426	537	133128	398	187866	626
92486	536	133248	396	187986	625
92546	536	133368	397	188106	629
92606	537	133488	397	188226	626
92666	537	133608	396	188346	628
92726	536	133728	396	188466	625
92786	536	133848	396	188586	625
92846	536	133968	397	188706	629
92906	537	134088	396	188826	628
92966	536	134208	396	188946	626
93026	537	134328	396	189066	631
93086	536	134448	395	189186	629
93146	537	134568	395	189306	631
93206	535	134688	395	189426	632
93266	536	134808	395	189546	631
93326	537	134928	395	189666	629
93386	536	135048	395	189786	628
93446	535	135168	394	189906	627
93506	536	135288	394	190026	629
93566	535	135408	394	190146	629
93626	535	135528	395	190266	629
93686	535	135648	394	190386	629
93746	535	135768	394	190506	631
93806	535	135888	393	190626	630
93866	535	136008	381	190746	632
93926	535	136128	390	190866	629
93986	535	136248	391	190986	632
94046	534	136368	392	191106	630
94106	534	136488	393	191226	630
94166	534	136608	391	191346	629
94226	535	136728	393	191466	631
94286	534	136848	391	191586	634
94346	533	136968	392	191706	629
94406	534	137088	392	191826	632
94466	534	137208	392	191946	633
94526	535	137332	391	192066	633
94586	534	137448	390	192186	630
94646	534	137568	390	192306	630
94706	533	137688	391	192426	629
94766	534	137808	391	192546	632
94826	533	137928	391	192666	632
94886	533	138048	391	192786	631
94946	533	138168	390	192906	634
95006	534	138288	391	193026	634
95066	533	138408	391	193146	632
95126	533	138528	391	193266	631
95186	534	138648	391	193386	631
95246	533	138768	390	193506	631
95306	533	138888	389	193626	631
95366	533	139008	390	193746	631
95426	532	139128	389	193866	631
95486	533	139248	389	193986	631
95546	533	139368	389	194106	633
95606	533	139488	390	194226	634
95666	533	139608	389	194346	632
95726	532	139728	389	194466	602
95786	532	139848	387	194586	627
95846	533	139968	387	194706	627
95906	533	140088	388	194826	632
95966	533	140208	387	194946	628
96026	533	140328	387	195066	626
96086	532	140448	387	195186	629
96146	532	140568	387	195306	628
96206	532	140688	387	195426	630
96266	532	140808	387	195546	631
96326	532	140928	386	195666	628
96386	531	141048	386	195786	630
96446	532	141168	387	195906	631
96506	532	141288	386	196026	631
96566	533	141408	385	196146	629
96626	532	141528	384	196266	628
96686	533	141648	385	196386	632
96746	532	141768	385	196506	626
96806	532	141888	385	196626	631
96866	532	142008	384	196746	631
96926	533	142128	384	196866	632
96986	532	142248	384	196986	630
97046	532	142368	385	197106	629
97106	531	142488	384	197226	632
97166	532	142608	384	197346	628
97226	532	142728	384	197466	633
97286	531	142848	383	197586	633
97346	532	142968	382	197706	628
97406	532	143088	382	197826	629
97466	532	143208	382	197946	630
97526	531	143328	381	198066	633
97586	532	143448	382	198186	634
97646	531	143568	381	198306	630
97706	531	143688	381	198426	632
97766	531	143808	381	198546	633
97826	531	143928	381	198666	631
97886	531	144048	381	198786	630
97946	531	144168	380	198906	631
98006	530	144288	380	199026	631
98066	531	144412	381	199146	634
98126	530	144528	380	199266	630
98186	530	144648	380	199386	631
98246	530	144768	380	199506	636
98306	531	144888	379	199626	629
98366	530	145008	381	199746	635
98426	531	145128	379	199866	601
98486	530	145248	379	199986	630
98546	530	145368	379	200106	626
98606	530	145488	380	200226	623
98666	530	145608	381	200346	627
98726	529	145728	379	200466	626
98786	530	145848	378	200586	630
98846	529	145968	379	200706	625
98906	529	146088	378	200826	627
98966	529	146208	378	200946	625
99026	530	146328	378	201066	624
99086	529	146448	379	201186	627
99146	529	146568	378	201306	629
99206	529	146688	378	201426	626
99266	528	146808	378	201546	626
99326	530	146928	379	201666	627
99386	530	147048	378	201786	631
99446	529	147168	377	201906	631
99506	529	147288	377	202026	630
99566	529	147408	378	202146	628
99626	529	147528	378	202266	627
99686	529	147648	377	202386	633
99746	529	147768	378	202506	628
99806	528	147888	377	202626	627
99866	528	148008	377	202746	627
99926	528	148128	377	202866	628
99986	527	148248	376	202986	625
100046	528	148368	377	203106	629
100106	528	148488	376	203226	630
100166	528	148608	376	203346	630
100226	528	148728	376	203466	629
100286	528	148848	378	203586	629
100346	528	148968	375	203706	628
100406	528	149088	376	203826	632
100466	527	149208	377	203946	604
100526	527	149328	376	204066	625
100586	527	149448	376	204186	631
100646	527	149568	375	204306	627
100706	527	149688	376	204426	625
100766	527	149808	376	204546	623
100826	527	149928	376	204666	624
100886	527	150048	374	204786	625
100946	527	150168	375	204906	624
101006	527	150288	375	205026	626
101066	527	150408	375	205146	628
101126	528	150528	376	205266	624
101186	527	150648	376	205386	629
101246	526	150768	376	205506	625
101306	527	150888	375	205626	625
101366	527	151008	376	205746	626
101426	526	151128	375	205866	627
101486	526	151248	375	205986	628
101546	526	151368	374	206106	630
101606	526	151488	374	206226	629
101666	526	151608	375	206346	628
101726	526	151728	375	206466	626
101786	526	151848	375	206586	630
101846	526	151968	375	206706	626
101906	526	152088	375	206826	627
101966	525	152208	375	206946	626
102026	526	152328	375	207066	630
102086	526	152448	375	207186	626
102146	525	152568	374	207306	627
102206	525	152688	374	207426	628
102266	526	152808	375	207546	628
102326	525	152928	375	207666	629
102386	525	153048	375	207786	629
102446	525	153168	374	207906	627
102506	526	153288	375	208026	633
102566	525	153408	374	208146	631
102626	525	153528	373	208266	631
102686	525	153648	375	208386	630
102746	525	153768	374	208506	628
102806	525	153888	373	208626	629
102866	525	154008	374	208746	630
102926	525	154128	374	208866	628
102986	525	154248	375	208986	630
103046	525	154368	375	209106	630
103106	525	154488	374	209226	635
103166	524	154608	373	209346	631
103226	525	154728	374	209466	632
103286	525	154848	373	209586	632
103346	524	154968	374	209706	634
103406	524	155088	375	209826	631
103466	524	155208	375	209946	632
103526	525	155328	373	210066	599
103586	524	155448	373	210186	625
103646	525	155568	374	210306	627
103706	524	155688	374	210426	626
103766	524	155808	375	210546	625
103826	524	155928	375	210666	630
103886	525	156048	373	210786	624
103946	524	156168	374	210906	625
104006	523	156288	373	211026	622
104066	524	156408	374	211146	625
104126	523	156528	373	211266	626
104186	524	156648	375	211386	629
104246	524	156768	374	211506	624
104306	523	156888	374	211626	627
104366	524	157008	373	211746	628
104426	523	157128	373	211866	628
104486	523	157248	374	211986	625
104546	523	157368	374	212106	625
104606	523	157488	374	212226	625
104666	523	157608	373	212346	623
104726	523	157728	374	212466	626
104786	524	157848	373	212586	627
104846	523	157968	375	212706	629
104906	524	158088	373	212826	626
104966	522	158208	374	212946	626
105026	523	158328	374	213066	625
105086	523	158448	374	213186	627
105146	523	158568	373	213306	628
105206	523	158688	374	213426	629
105266	522	158808	375	213546	631
105326	522	158928	374	213666	629
105386	523	159048	374	213786	629
105446	522	159168	375	213906	630
105506	522	159288	374	214026	628
105566	521	159408	374	214146	629
105626	521	159528	374	214266	630
105686	522	159648	374	214386	629
105746	522	159768	374	214506	627
105806	522	159888	373	214626	631
105866	522	160008	374	214746	629
105926	522	160132	374	214866	629
105986	522	160248	373	214986	628
106046	521	160368	374	215106	629
106106	521	160488	374	215226	631
106166	521	160608	375	215346	631
106226	522	160728	375	215466	630
106286	521	160852	374	215586	632
106346	521	160972	374	215706	631
106406	521	161088	374	215826	630
106466	521	161208	373	215946	632
106526	521	161332	375	216066	632
106586	521	161448	374	216186	630
106646	521	161572	374	216306	632
106706	521	161688	375	216426	630
106766	521	161808	374	216546	633
106826	521	161932	374	216666	630
106886	520	162048	374	216786	630
106946	521	162172	373	216906	629
107006	521	162288	374	217026	632
107066	520	162408	374	217146	635
107126	519	162528	374	217266	633
107186	520	162648	374	217386	631
107246	521	162768	374	217506	633
107306	521	162888	374	217626	633
107366	520	163012	374	217746	632
107426	521	163132	374	217866	632
107486	521	163248	374	217986	634
107546	521	163368	374	218106	633
107606	520	163488	374	218226	633
107666	521	163608	374	218346	632
107726	520	163728	373	218466	633
107786	521	163852	374	218586	634
107846	520	163968	374	218706	630
107906	519	164088	373	218826	634
107966	521	164208	375	218946	634
108026	520	164328	374	219066	635
108086	520	164448	373	219186	632
108146	519	164568	374	219306	633
108206	520	164688	374	219426	633
108266	520	164808	374	219546	632
108326	520	164928	374	219666	632
108386	520	165048	375	219786	633
108446	520	165168	374	219906	632
108506	521	165288	374	220026	634
108566	520	165408	374	220146	632
108626	520	165528	373	220266	633
108686	520	165648	373	220386	634
108746	521	165768	373	220506	633
108806	521	165888	373	220626	633
108866	520	166008	374	220746	633
108926	521	166128	373	220866	591
108986	519	166248	374	220986	627
109046	520	166372	373	221106	628
109106	520	166488	373	221226	628
109166	520	166608	373	221346	627
109226	519	166728	374	221466	630
109286	520	166848	373	221586	629
109346	520	166968	373	221706	628
109406	520	167088	374	221826	627
109466	520	167208	373	221946	629
109526	521	167328	374	222066	630
109586	519	167448	373	222186	626
109646	519	167568	373	222306	626
109706	519	167688	373	222426	631
109766	519	167812	373	222546	626
109826	519	167928	373	222666	627
109886	520	168048	372	222786	632
109946	520	168168	372	222906	627
110006	520	168288	373	223026	628
110066	520	168412	374	223146	629
110126	519	168528	373	223266	627
110186	519	168648	373	223386	627
110246	520	168768	372	223506	627
110306	519	168892	373	223626	627
110366	520	169008	373	223746	632
110426	519	169128	373	223866	631
110486	520	169248	373	223986	627
110546	520	169368	373	224106	631
110606	519	169488	372	224226	629
110666	519	169608	372	224346	630
110726	520	169728	372	224466	631
110786	519	169848	373	224586	630
110846	519	169968	373	224706	631
110906	518	170088	373	224826	630
110966	518	170208	372	224946	630
111026	518	170328	372	225066	631
111086	519	170452	372	225186	630
111146	519	170568	373	225306	632
111206	518	170688	373	225426	630
111266	518	170808	372	225546	632
111326	518	170928	373	225666	630
111386	519	171048	371	225786	631
111446	519	171168	372	225906	630
111506	518	171288	372	226026	632
111566	518	171408	372	226146	631
111626	517	171528	372	226266	631
111686	517	171652	372	226386	630
111746	518	171768	372	226506	631
111806	517	171892	372	226626	633
111866	518	172008	373	226746	629
111926	518	172128	372	226866	631
111986	517	172248	327	226986	628
112046	517	172368	374	227106	630
112106	517	172488	377	227226	630
112166	518	172608	378	227346	632
112226	517	172728	378	227466	632
112286	517	172848	378	227586	631
112346	516	172968	378	227706	632
112406	516	173088	379	227826	630
112466	516	173208	379	227946	629
112526	517	173328	379	228066	631
112586	517	173448	379	228186	632
112646	517	173568	379	228306	633
112706	516	173688	379	228426	632
112766	517	173808	380	228546	631
112826	516	173928	379	228666	634
112886	515	174052	380	228786	631
112946	516	174168	378	228906	625
113006	516	174288	379	229026	628
113066	516	174408	379	229146	632
113126	515	174528	378	229266	630
113186	515	174648	380	229386	629
113246	516	174772	379	229506	631
113306	515	174888	378	229626	632
113366	516	175008	378	229746	633
113426	515	175128	379	229866	628
113486	516	175248	378	229986	631
113546	515	175372	379	230106	632
113606	515	175488	378	230226	631
113666	515	175608	378	230346	632
113726	515	175728	378	230466	632
113786	515	175848	379	230586	630
113846	515	175968	378	230706	631
113906	515	176088	379	230826	632
113966	514	176208	378	230946	631
114026	514	176328	378	231066	633
114086	515	176448	378	231186	634
114146	514	176568	378	231306	634
114206	515	176688	377	231426	635
114266	514	176808	377	231546	632
114326	514	176928	378	231666	632
114386	515	177048	378	231786	633
114446	515	177168	378	231906	631
114506	513	177292	376	232026	630
114566	514	177408	377	232146	632
114626	513	177528	377	232266	632
114686	513	177648	376	232386	632
114746	513	177768	377	232506	632
114806	513	177888	376	232626	633
114866	513	178008	377	232746	633
114926	513	178128	376	232866	630
114986	513	178248	376	232986	631
115046	513	178368	375	233106	631
115106	513	178488	376	233226	632
115166	513	178608	375	233346	632
115226	513	178728	375	233466	633
115286	513	178848	374	233586	633
115346	513	178968	374	233706	632
115406	513	179092	375	233826	632
115466	512	179208	374	233946	632
115526	512	179328	374	234066	633
115586	512	179448	374	234186	632
115646	512	179577	375	234306	633
115706	512	179688	375	234426	632
115766	512	179808	373	234546	634
115826	512	179928	375	234666	631
115886	512	180048	373	234786	631
115946	511	180168	374	234906	631
116006	511	180288	374	235026	630
116066	512	180408	374	235146	632
116126	511	180528	374	235266	631
116186	512	180648	374	235386	630
116246	512	180768	373	235506	629
116306	511	180888	370	235626	630
116366	512	181008	377	235746	630
116426	510	181128	379	235866	632
116486	512	181248	380	235986	633
116546	512	181368	379	236106	631
116606	512	181492	379	236226	632
116666	512	181612	380	236346	632
116726	511	181728	381	236466	630
116786	510	181848	381	236586	630
[truncated: 14,775 more rows]
