# Supplementary material for: Interaction of Cleat-Matrix on Coal Permeability from Experimental Observations and Numerical Analysis
Source: Hindawi journal article supplement (doi:10.1155/2019/7474587), 2019-11-18
Supplement: f1 [file 7474587.f1.zip › 7474587.f1.xlsx/Fig.7 and Fig.8.xlsx]

## Sheet: Sheet1
Fig.7
Time	5MPa pore pressure vs 7MPa confining stress	Time	3MPa pore pressure vs 7MPa confining stress	Time	1MPa pore pressure vs 7MPa confining stress
9557	2.7442e-18	5594	2.19595e-18	9794	1.21121e-18
19217	2.62053e-18	16634	2.04432e-18	18934	1.18113e-18
25337	2.59698e-18	53894	1.95509e-18	45974	1.17178e-18
29897	2.5852e-18	75014	1.97276e-18	75594	1.17077e-18
36857	2.56753e-18	103754	1.95509e-18	86634	1.15421e-18
41357	2.56342e-18	153519	2.11409e-18	123894	1.15499e-18
45737	2.55342e-18	180225	1.97865e-18
Fig.8
Time	3MPa pore pressure vs 5MPa confining stress	Time	4MPa pore pressure vs 6MPa confining stress	Time	5MPa pore pressure vs 7MPa confining stress
9590	4.01796e-18	10140	3.31541e-18	9557	2.7442e-18
17510	3.87485e-18	16080	3.28008e-18	19217	2.62053e-18
28010	3.81596e-18	24660	3.22119e-18	25337	2.59698e-18
64321	3.66286e-18	37440	3.13875e-18	29897	2.5852e-18
75661	3.76885e-18	46260	3.16819e-18	36857	2.56753e-18
88321	3.70997e-18	53520	3.11005e-18	41357	2.56342e-18
106621	3.73941e-18	61440	3.09164e-18	45737	2.55342e-18
